# Supplementary material for: Comparison of lifestyle, cognitive function, mental health, and quality of life between hospitalized older adults with COVID-19 and non-COVID-19 in South Korea: a cross-sectional study
Source: Springer Nature journal article supplement (doi:10.1186/s12877-023-04646-y), 2024-04-02

Group=1

| Gender | Frequency | Percent | Cumulative Frequency | Cumulative Percent |
|--------|-----------|---------|----------------------|--------------------|
| 1      | 92        | 48.68   | 92                   | 48.68              |
| 2      | 97        | 51.32   | 189                  | 100.00             |

| Study | Frequency | Percent | Cumulative Frequency | Cumulative Percent |
|-------|-----------|---------|----------------------|--------------------|
| 2     | 2         | 1.06    | 2                    | 1.06               |
| 3     | 4         | 2.12    | 6                    | 3.17               |
| 4     | 54        | 28.57   | 60                   | 31.75              |
| 5     | 129       | 68.25   | 189                  | 100.00             |

| Occupation | Frequency | Percent | Cumulative Frequency | Cumulative Percent |
|------------|-----------|---------|----------------------|--------------------|
| 1          | 108       | 57.14   | 108                  | 57.14              |
| 2          | 81        | 42.86   | 189                  | 100.00             |

| HTN | Frequency | Percent | Cumulative Frequency | Cumulative Percent |
|-----|-----------|---------|----------------------|--------------------|
| 1   | 122       | 64.55   | 122                  | 64.55              |
| 2   | 67        | 35.45   | 189                  | 100.00             |

| DM | Frequency | Percent | Cumulative Frequency | Cumulative Percent |
|----|-----------|---------|----------------------|--------------------|
| 1  | 169       | 89.42   | 169                  | 89.42              |
| 2  | 20        | 10.58   | 189                  | 100.00             |

| HL | Frequency | Percent | Cumulative Frequency | Cumulative Percent |
|----|-----------|---------|----------------------|--------------------|
| 1  | 169       | 89.42   | 169                  | 89.42              |
| 2  | 20        | 10.58   | 189                  | 100.00             |

| Cerebrovascular | Frequency | Percent | Cumulative Frequency | Cumulative Percent |
|-----------------|-----------|---------|----------------------|--------------------|
| 1               | 189       | 100.00  | 189                  | 100.00             |

| Cardiovascular | Frequency | Percent | Cumulative Frequency | Cumulative Percent |
|----------------|-----------|---------|----------------------|--------------------|
| 1              | 185       | 97.88   | 185                  | 97.88              |
| 2              | 4         | 2.12    | 189                  | 100.00             |

Group=1

| etc | Frequency | Percent | Cumulative Frequency | Cumulative Percent |
|-----|-----------|---------|----------------------|--------------------|
| III | 32        | 16.93   | 32                   | 16.93              |
| 1   | 156       | 82.54   | 188                  | 99.47              |
| B□  | 1         | 0.53    | 189                  | 100.00             |

Group=2

| Gender | Frequency | Percent | Cumulative Frequency | Cumulative Percent |
|--------|-----------|---------|----------------------|--------------------|
| 1      | 39        | 35.14   | 39                   | 35.14              |
| 2      | 72        | 64.86   | 111                  | 100.00             |

| Study | Frequency | Percent | Cumulative Frequency | Cumulative Percent |
|-------|-----------|---------|----------------------|--------------------|
| 1     | 38        | 34.23   | 38                   | 34.23              |
| 2     | 19        | 17.12   | 57                   | 51.35              |
| 3     | 19        | 17.12   | 76                   | 68.47              |
| 4     | 22        | 19.82   | 98                   | 88.29              |
| 5     | 13        | 11.71   | 111                  | 100.00             |

| Occupation | Frequency | Percent | Cumulative Frequency | Cumulative Percent |
|------------|-----------|---------|----------------------|--------------------|
| 1          | 62        | 55.86   | 62                   | 55.86              |
| 2          | 38        | 34.23   | 100                  | 90.09              |
| 3          | 11        | 9.91    | 111                  | 100.00             |

| HTN | Frequency | Percent | Cumulative Frequency | Cumulative Percent |
|-----|-----------|---------|----------------------|--------------------|
| 1   | 62        | 55.86   | 62                   | 55.86              |
| 2   | 49        | 44.14   | 111                  | 100.00             |

| DM | Frequency | Percent | Cumulative Frequency | Cumulative Percent |
|----|-----------|---------|----------------------|--------------------|
| 1  | 84        | 75.68   | 84                   | 75.68              |
| 2  | 27        | 24.32   | 111                  | 100.00             |

| HL | Frequency | Percent | Cumulative Frequency | Cumulative Percent |
|----|-----------|---------|----------------------|--------------------|
| 1  | 77        | 69.37   | 77                   | 69.37              |
| 2  | 34        | 30.63   | 111                  | 100.00             |

Group=2

| Cerebrovascular | Frequency | Percent | Cumulative Frequency | Cumulative Percent |
|-----------------|-----------|---------|----------------------|--------------------|
| 1               | 103       | 92.79   | 103                  | 92.79              |
| 2               | 8         | 7.21    | 111                  | 100.00             |

| Cardiovascular | Frequency | Percent | Cumulative Frequency | Cumulative Percent |
|----------------|-----------|---------|----------------------|--------------------|
| 1              | 91        | 81.98   | 91                   | 81.98              |
| 2              | 20        | 18.02   | 111                  | 100.00             |

| etc | Frequency | Percent | Cumulative Frequency | Cumulative Percent |
|-----|-----------|---------|----------------------|--------------------|
| III | 21        | 18.92   | 21                   | 18.92              |
| 1   | 90        | 81.08   | 111                  | 100.00             |

| Frequency<br>Expected<br>Percent<br>Row Pct<br>Col Pct | Table of Group by Gender |                                        |                                         |                  |
|--------------------------------------------------------|--------------------------|----------------------------------------|-----------------------------------------|------------------|
|                                                        | Group                    | Gender                                 |                                         | Total            |
|                                                        |                          | 1                                      | 2                                       |                  |
|                                                        | 1                        | 92<br>82.53<br>30.67<br>48.68<br>70.23 | 97<br>106.47<br>32.33<br>51.32<br>57.40 | 189<br><br>63.00 |
|                                                        | 2                        | 39<br>48.47<br>13.00<br>35.14<br>29.77 | 72<br>62.53<br>24.00<br>64.86<br>42.60  | 111<br><br>37.00 |
|                                                        | <b>Total</b>             | 131<br>43.67                           | 169<br>56.33                            | 300<br>100.00    |

Statistics for Table of Group by Gender

| Statistic                   | DF | Value  | Prob   |
|-----------------------------|----|--------|--------|
| Chi-Square                  | 1  | 5.2134 | 0.0224 |
| Likelihood Ratio Chi-Square | 1  | 5.2667 | 0.0217 |
| Continuity Adj. Chi-Square  | 1  | 4.6774 | 0.0306 |
| Mantel-Haenszel Chi-Square  | 1  | 5.1960 | 0.0226 |
| Phi Coefficient             |    | 0.1318 |        |
| Contingency Coefficient     |    | 0.1307 |        |
| Cramer's V                  |    | 0.1318 |        |

| Fisher's Exact Test      |        |
|--------------------------|--------|
| Cell (1,1) Frequency (F) | 92     |
| Left-sided Pr <= F       | 0.9921 |
| Right-sided Pr >= F      | 0.0150 |
| Table Probability (P)    | 0.0071 |
| Two-sided Pr <= P        | 0.0298 |

Sample Size = 300

| Frequency<br>Expected<br>Percent<br>Row Pct<br>Col Pct | Table of Group by Study |                                         |                                      |                                      |                                        |                                         |               |
|--------------------------------------------------------|-------------------------|-----------------------------------------|--------------------------------------|--------------------------------------|----------------------------------------|-----------------------------------------|---------------|
|                                                        | Group                   | Study                                   |                                      |                                      |                                        |                                         | Total         |
|                                                        |                         | 1                                       | 2                                    | 3                                    | 4                                      | 5                                       |               |
|                                                        | 1                       | 0<br>23.94<br>0.00<br>0.00<br>0.00      | 2<br>13.23<br>0.67<br>1.06<br>9.52   | 4<br>14.49<br>1.33<br>2.12<br>17.39  | 54<br>47.88<br>18.00<br>28.57<br>71.05 | 129<br>89.46<br>43.00<br>68.25<br>90.85 | 189<br>63.00  |
|                                                        | 2                       | 38<br>14.06<br>12.67<br>34.23<br>100.00 | 19<br>7.77<br>6.33<br>17.12<br>90.48 | 19<br>8.51<br>6.33<br>17.12<br>82.61 | 22<br>28.12<br>7.33<br>19.82<br>28.95  | 13<br>52.54<br>4.33<br>11.71<br>9.15    | 111<br>37.00  |
|                                                        | <b>Total</b>            | 38<br>12.67                             | 21<br>7.00                           | 23<br>7.67                           | 76<br>25.33                            | 142<br>47.33                            | 300<br>100.00 |

Statistics for Table of Group by Study

| Statistic                   | DF | Value    | Prob   |
|-----------------------------|----|----------|--------|
| Chi-Square                  | 4  | 160.3376 | <.0001 |
| Likelihood Ratio Chi-Square | 4  | 182.5211 | <.0001 |
| Mantel-Haenszel Chi-Square  | 1  | 151.8376 | <.0001 |
| Phi Coefficient             |    | 0.7311   |        |
| Contingency Coefficient     |    | 0.5902   |        |
| Cramer's V                  |    | 0.7311   |        |

Sample Size = 300

| Frequency<br>Expected<br>Percent<br>Row Pct<br>Col Pct | Table of Group by Occupation |            |        |        |       |
|--------------------------------------------------------|------------------------------|------------|--------|--------|-------|
|                                                        | Group                        | Occupation |        |        | Total |
|                                                        |                              | 1          | 2      | 3      |       |
| 1                                                      | 108                          | 81         | 0      | 189    |       |
|                                                        | 107.1                        | 74.97      | 6.93   |        |       |
|                                                        | 36.00                        | 27.00      | 0.00   | 63.00  |       |
|                                                        | 57.14                        | 42.86      | 0.00   |        |       |
|                                                        | 63.53                        | 68.07      | 0.00   |        |       |
| 2                                                      | 62                           | 38         | 11     | 111    |       |
|                                                        | 62.9                         | 44.03      | 4.07   |        |       |
|                                                        | 20.67                        | 12.67      | 3.67   | 37.00  |       |
|                                                        | 55.86                        | 34.23      | 9.91   |        |       |
|                                                        | 36.47                        | 31.93      | 100.00 |        |       |
| Total                                                  | 170                          | 119        | 11     | 300    |       |
|                                                        | 56.67                        | 39.67      | 3.67   | 100.00 |       |

Statistics for Table of Group by Occupation

| Statistic                   | DF | Value   | Prob   |
|-----------------------------|----|---------|--------|
| Chi-Square                  | 2  | 20.0610 | <.0001 |
| Likelihood Ratio Chi-Square | 2  | 23.2329 | <.0001 |
| Mantel-Haenszel Chi-Square  | 1  | 2.7100  | 0.0997 |
| Phi Coefficient             |    | 0.2586  |        |
| Contingency Coefficient     |    | 0.2504  |        |
| Cramer's V                  |    | 0.2586  |        |

Sample Size = 300

| Frequency<br>Expected<br>Percent<br>Row Pct<br>Col Pct | Table of Group by HTN |       |        |       |
|--------------------------------------------------------|-----------------------|-------|--------|-------|
|                                                        | Group                 | HTN   |        | Total |
|                                                        |                       | 1     | 2      |       |
| 1                                                      | 122                   | 67    | 189    |       |
|                                                        | 115.92                | 73.08 | 63.00  |       |
|                                                        | 40.67                 | 22.33 |        |       |
|                                                        | 64.55                 | 35.45 |        |       |
|                                                        | 66.30                 | 57.76 |        |       |
| 2                                                      | 62                    | 49    | 111    |       |
|                                                        | 68.08                 | 42.92 | 37.00  |       |
|                                                        | 20.67                 | 16.33 |        |       |
|                                                        | 55.86                 | 44.14 |        |       |
|                                                        | 33.70                 | 42.24 |        |       |
| Total                                                  | 184                   | 116   | 300    |       |
|                                                        | 61.33                 | 38.67 | 100.00 |       |

Statistics for Table of Group by HTN

| Statistic                   | DF | Value  | Prob   |
|-----------------------------|----|--------|--------|
| Chi-Square                  | 1  | 2.2290 | 0.1354 |
| Likelihood Ratio Chi-Square | 1  | 2.2171 | 0.1365 |
| Continuity Adj. Chi-Square  | 1  | 1.8775 | 0.1706 |
| Mantel-Haenszel Chi-Square  | 1  | 2.2216 | 0.1361 |
| Phi Coefficient             |    | 0.0862 |        |
| Contingency Coefficient     |    | 0.0859 |        |
| Cramer's V                  |    | 0.0862 |        |

| Fisher's Exact Test      |        |
|--------------------------|--------|
| Cell (1,1) Frequency (F) | 122    |
| Left-sided Pr <= F       | 0.9466 |
| Right-sided Pr >= F      | 0.0856 |
| Table Probability (P)    | 0.0322 |
| Two-sided Pr <= P        | 0.1425 |

Sample Size = 300

| Frequency<br>Expected<br>Percent<br>Row Pct<br>Col Pct | Table of Group by DM                     |                                       |                  |       |
|--------------------------------------------------------|------------------------------------------|---------------------------------------|------------------|-------|
|                                                        | Group                                    | DM                                    |                  | Total |
|                                                        |                                          | 1                                     | 2                |       |
| <b>1</b>                                               | 169<br>159.39<br>56.33<br>89.42<br>66.80 | 20<br>29.61<br>6.67<br>10.58<br>42.55 | 189<br><br>63.00 |       |
| <b>2</b>                                               | 84<br>93.61<br>28.00<br>75.68<br>33.20   | 27<br>17.39<br>9.00<br>24.32<br>57.45 | 111<br><br>37.00 |       |
| <b>Total</b>                                           | 253<br>84.33                             | 47<br>15.67                           | 300<br>100.00    |       |

**Statistics for Table of Group by DM**

| Statistic                   | DF | Value  | Prob   |
|-----------------------------|----|--------|--------|
| Chi-Square                  | 1  | 9.9956 | 0.0016 |
| Likelihood Ratio Chi-Square | 1  | 9.6519 | 0.0019 |
| Continuity Adj. Chi-Square  | 1  | 8.9825 | 0.0027 |
| Mantel-Haenszel Chi-Square  | 1  | 9.9622 | 0.0016 |
| Phi Coefficient             |    | 0.1825 |        |
| Contingency Coefficient     |    | 0.1796 |        |
| Cramer's V                  |    | 0.1825 |        |

| Fisher's Exact Test      |        |
|--------------------------|--------|
| Cell (1,1) Frequency (F) | 169    |
| Left-sided Pr <= F       | 0.9995 |
| Right-sided Pr >= F      | 0.0016 |
| Table Probability (P)    | 0.0010 |
| Two-sided Pr <= P        | 0.0027 |

**Sample Size = 300**

| Frequency<br>Expected<br>Percent<br>Row Pct<br>Col Pct | Table of Group by HL |       |        |       |
|--------------------------------------------------------|----------------------|-------|--------|-------|
|                                                        | Group                | HL    |        | Total |
|                                                        |                      | 1     | 2      |       |
| 1                                                      | 169                  | 20    | 189    |       |
|                                                        | 154.98               | 34.02 |        |       |
|                                                        | 56.33                | 6.67  | 63.00  |       |
|                                                        | 89.42                | 10.58 |        |       |
|                                                        | 68.70                | 37.04 |        |       |
| 2                                                      | 77                   | 34    | 111    |       |
|                                                        | 91.02                | 19.98 |        |       |
|                                                        | 25.67                | 11.33 | 37.00  |       |
|                                                        | 69.37                | 30.63 |        |       |
|                                                        | 31.30                | 62.96 |        |       |
| Total                                                  | 246                  | 54    | 300    |       |
|                                                        | 82.00                | 18.00 | 100.00 |       |

Statistics for Table of Group by HL

| Statistic                   | DF | Value   | Prob   |
|-----------------------------|----|---------|--------|
| Chi-Square                  | 1  | 19.0435 | <.0001 |
| Likelihood Ratio Chi-Square | 1  | 18.4136 | <.0001 |
| Continuity Adj. Chi-Square  | 1  | 17.7094 | <.0001 |
| Mantel-Haenszel Chi-Square  | 1  | 18.9800 | <.0001 |
| Phi Coefficient             |    | 0.2519  |        |
| Contingency Coefficient     |    | 0.2443  |        |
| Cramer's V                  |    | 0.2519  |        |

| Fisher's Exact Test      |        |
|--------------------------|--------|
| Cell (1,1) Frequency (F) | 169    |
| Left-sided Pr <= F       | 1.0000 |
| Right-sided Pr >= F      | <.0001 |
| Table Probability (P)    | <.0001 |
| Two-sided Pr <= P        | <.0001 |

Sample Size = 300



| Frequency<br>Expected<br>Percent<br>Row Pct<br>Col Pct | Table of Group by Cerebrovascular |                 |        |        |
|--------------------------------------------------------|-----------------------------------|-----------------|--------|--------|
|                                                        | Group                             | Cerebrovascular |        |        |
|                                                        |                                   | 1               | 2      | Total  |
|                                                        | 1                                 | 189             | 0      | 189    |
|                                                        |                                   | 183.96          | 5.04   |        |
|                                                        |                                   | 63.00           | 0.00   | 63.00  |
|                                                        |                                   | 100.00          | 0.00   |        |
|                                                        |                                   | 64.73           | 0.00   |        |
|                                                        | 2                                 | 103             | 8      | 111    |
|                                                        |                                   | 108.04          | 2.96   |        |
|                                                        |                                   | 34.33           | 2.67   | 37.00  |
|                                                        |                                   | 92.79           | 7.21   |        |
|                                                        |                                   | 35.27           | 100.00 |        |
|                                                        | <b>Total</b>                      | 292             | 8      | 300    |
|                                                        |                                   | 97.33           | 2.67   | 100.00 |

Statistics for Table of Group by Cerebrovascular

| Statistic                                                                                              | DF | Value   | Prob   |
|--------------------------------------------------------------------------------------------------------|----|---------|--------|
| Chi-Square                                                                                             | 1  | 13.9948 | 0.0002 |
| Likelihood Ratio Chi-Square                                                                            | 1  | 16.2837 | <.0001 |
| Continuity Adj. Chi-Square                                                                             | 1  | 11.3558 | 0.0008 |
| Mantel-Haenszel Chi-Square                                                                             | 1  | 13.9482 | 0.0002 |
| Phi Coefficient                                                                                        |    | 0.2160  |        |
| Contingency Coefficient                                                                                |    | 0.2111  |        |
| Cramer's V                                                                                             |    | 0.2160  |        |
| <b>WARNING: 25% of the cells have expected counts less than 5. Chi-Square may not be a valid test.</b> |    |         |        |

| Fisher's Exact Test      |        |
|--------------------------|--------|
| Cell (1,1) Frequency (F) | 189    |
| Left-sided Pr <= F       | 1.0000 |
| Right-sided Pr >= F      | 0.0003 |
|                          |        |
| Table Probability (P)    | 0.0003 |
| Two-sided Pr <= P        | 0.0003 |

Sample Size = 300

| Frequency<br>Expected<br>Percent<br>Row Pct<br>Col Pct | Table of Group by Cardiovascular        |                                          |                                     |                  |
|--------------------------------------------------------|-----------------------------------------|------------------------------------------|-------------------------------------|------------------|
|                                                        | Group                                   | Cardiovascular                           |                                     |                  |
|                                                        |                                         | 1                                        | 2                                   | Total            |
|                                                        | 1                                       | 185<br>173.88<br>61.67<br>97.88<br>67.03 | 4<br>15.12<br>1.33<br>2.12<br>16.67 | 189<br><br>63.00 |
| 2                                                      | 91<br>102.12<br>30.33<br>81.98<br>32.97 | 20<br>8.88<br>6.67<br>18.02<br>83.33     | 111<br><br>37.00                    |                  |
| <b>Total</b>                                           | 276<br>92.00                            | 24<br>8.00                               | 300<br>100.00                       |                  |

Statistics for Table of Group by Cardiovascular

| Statistic                   | DF | Value   | Prob   |
|-----------------------------|----|---------|--------|
| Chi-Square                  | 1  | 24.0253 | <.0001 |
| Likelihood Ratio Chi-Square | 1  | 23.7933 | <.0001 |
| Continuity Adj. Chi-Square  | 1  | 21.9133 | <.0001 |
| Mantel-Haenszel Chi-Square  | 1  | 23.9452 | <.0001 |
| Phi Coefficient             |    | 0.2830  |        |
| Contingency Coefficient     |    | 0.2723  |        |
| Cramer's V                  |    | 0.2830  |        |

| Fisher's Exact Test      |        |
|--------------------------|--------|
| Cell (1,1) Frequency (F) | 185    |
| Left-sided Pr <= F       | 1.0000 |
| Right-sided Pr >= F      | <.0001 |
| Table Probability (P)    | <.0001 |
| Two-sided Pr <= P        | <.0001 |

Sample Size = 300

| Group | N Obs | Variable     | N         | Mean       | Std Dev    | Minimum     | Maximum     |
|-------|-------|--------------|-----------|------------|------------|-------------|-------------|
| 1     | 189   | Age          | 189       | 61.4126984 | 5.8043498  | 55.0000000  | 78.0000000  |
|       |       | YLPPA_PRE    | 189       | 11.2328042 | 3.4408038  | 5.0000000   | 25.0000000  |
|       |       | YLPPA_POST   | 189       | 9.8253968  | 3.3968368  | 5.0000000   | 22.0000000  |
|       |       | YLPPA_Diff   | 189       | 1.4074074  | 3.1737199  | -9.0000000  | 12.0000000  |
|       |       | YLPAP_PRE    | 189       | 8.4761905  | 2.3351419  | 4.0000000   | 19.0000000  |
|       |       | YLPAP_POST   | 189       | 6.7671958  | 1.9043017  | 4.0000000   | 14.0000000  |
|       |       | YLPAP_Diff   | 189       | 1.7089947  | 2.0355807  | -5.0000000  | 8.0000000   |
|       |       | YLPDIET_PRE  | 189       | 33.3492063 | 7.7682361  | 20.0000000  | 55.0000000  |
|       |       | YLPDIET_POST | 189       | 33.0052910 | 7.7249922  | 16.0000000  | 55.0000000  |
|       |       | YLPDIET_Diff | 189       | 0.3439153  | 4.5794671  | -16.0000000 | 25.0000000  |
|       |       | VASD         | 189       | 4.3756614  | 2.3882782  | 1.0000000   | 10.0000000  |
|       |       | PHQ          | 189       | 4.1375661  | 4.0974975  | 0           | 20.0000000  |
|       |       | VASA         | 189       | 5.2063492  | 2.0276708  | 1.0000000   | 9.0000000   |
|       |       | SAS          | 189       | 36.2328042 | 7.3375153  | 23.0000000  | 70.0000000  |
|       |       | ISI          | 189       | 8.5767196  | 6.2544187  | 0           | 28.0000000  |
|       |       | FCV          | 189       | 17.4814815 | 5.9444168  | 7.0000000   | 34.0000000  |
|       |       | WHOQOL       | 189       | 84.0000000 | 13.9969602 | 49.0000000  | 118.0000000 |
|       |       | PRMQ         | 189       | 30.1693122 | 8.6800646  | 16.0000000  | 58.0000000  |
|       |       | PM           | 189       | 15.4708995 | 4.3485691  | 8.0000000   | 28.0000000  |
|       |       | RM           | 189       | 14.6984127 | 4.6102393  | 8.0000000   | 30.0000000  |
| SMCQ  | 189   | 2.6402116    | 2.5511099 | 0          | 14.0000000 |             |             |
| 2     | 111   | Age          | 111       | 68.6306306 | 7.8727700  | 54.0000000  | 86.0000000  |
|       |       | YLPPA_PRE    | 111       | 8.9369369  | 2.1160825  | 4.0000000   | 18.0000000  |
|       |       | YLPPA_POST   | 111       | 5.1621622  | 0.5960558  | 5.0000000   | 9.0000000   |
|       |       | YLPPA_Diff   | 111       | 3.7747748  | 2.1049063  | -1.0000000  | 13.0000000  |
|       |       | YLPAP_PRE    | 111       | 6.2072072  | 2.1705346  | 4.0000000   | 16.0000000  |
|       |       | YLPAP_POST   | 111       | 4.3153153  | 0.5874751  | 4.0000000   | 6.0000000   |
|       |       | YLPAP_Diff   | 111       | 1.8918919  | 2.0597941  | -1.0000000  | 12.0000000  |
|       |       | YLPDIET_PRE  | 111       | 34.0180180 | 4.4558072  | 25.0000000  | 48.0000000  |
|       |       | YLPDIET_POST | 111       | 29.2792793 | 3.3362232  | 16.0000000  | 41.0000000  |
|       |       | YLPDIET_Diff | 111       | 4.7387387  | 5.0284856  | -6.0000000  | 25.0000000  |
|       |       | VASD         | 111       | 4.8738739  | 2.1282392  | 0           | 10.0000000  |
|       |       | PHQ          | 111       | 5.1081081  | 4.0030701  | 0           | 19.0000000  |
|       |       | VASA         | 111       | 5.2972973  | 2.6236498  | 0           | 10.0000000  |
|       |       | SAS          | 111       | 37.0540541 | 7.3630994  | 21.0000000  | 56.0000000  |
|       |       | ISI          | 111       | 10.7027027 | 5.2006898  | 2.0000000   | 28.0000000  |
|       |       | FCV          | 111       | 17.4324324 | 5.3557473  | 7.0000000   | 35.0000000  |
|       |       | WHOQOL       | 111       | 89.0720721 | 15.2528458 | 54.0000000  | 123.0000000 |
|       |       | PRMQ         | 111       | 32.6036036 | 9.4851839  | 17.0000000  | 60.0000000  |
|       |       | PM           | 111       | 18.4774775 | 5.6469571  | 9.0000000   | 31.0000000  |
|       |       | RM           | 111       | 14.1261261 | 4.4926548  | 8.0000000   | 32.0000000  |
| SMCQ  | 111   | 2.9639640    | 2.6489378 | 0          | 10.0000000 |             |             |

**Difference: YLPPA\_PRE - YLPPA\_POST**

| N   | Mean   | Std Dev | Std Err | Minimum | Maximum |
|-----|--------|---------|---------|---------|---------|
| 189 | 1.4074 | 3.1737  | 0.2309  | -9.0000 | 12.0000 |

| Mean   | 95% CL Mean |        | Std Dev | 95% CL Std Dev |        |
|--------|-------------|--------|---------|----------------|--------|
| 1.4074 | 0.9520      | 1.8628 | 3.1737  | 2.8828         | 3.5305 |

| DF  | t Value | Pr >  t |
|-----|---------|---------|
| 188 | 6.10    | <.0001  |

Difference: YLPPA\_PRE - YLPPA\_POST

Difference: YLPPA\_PRE - YLPPA\_POST

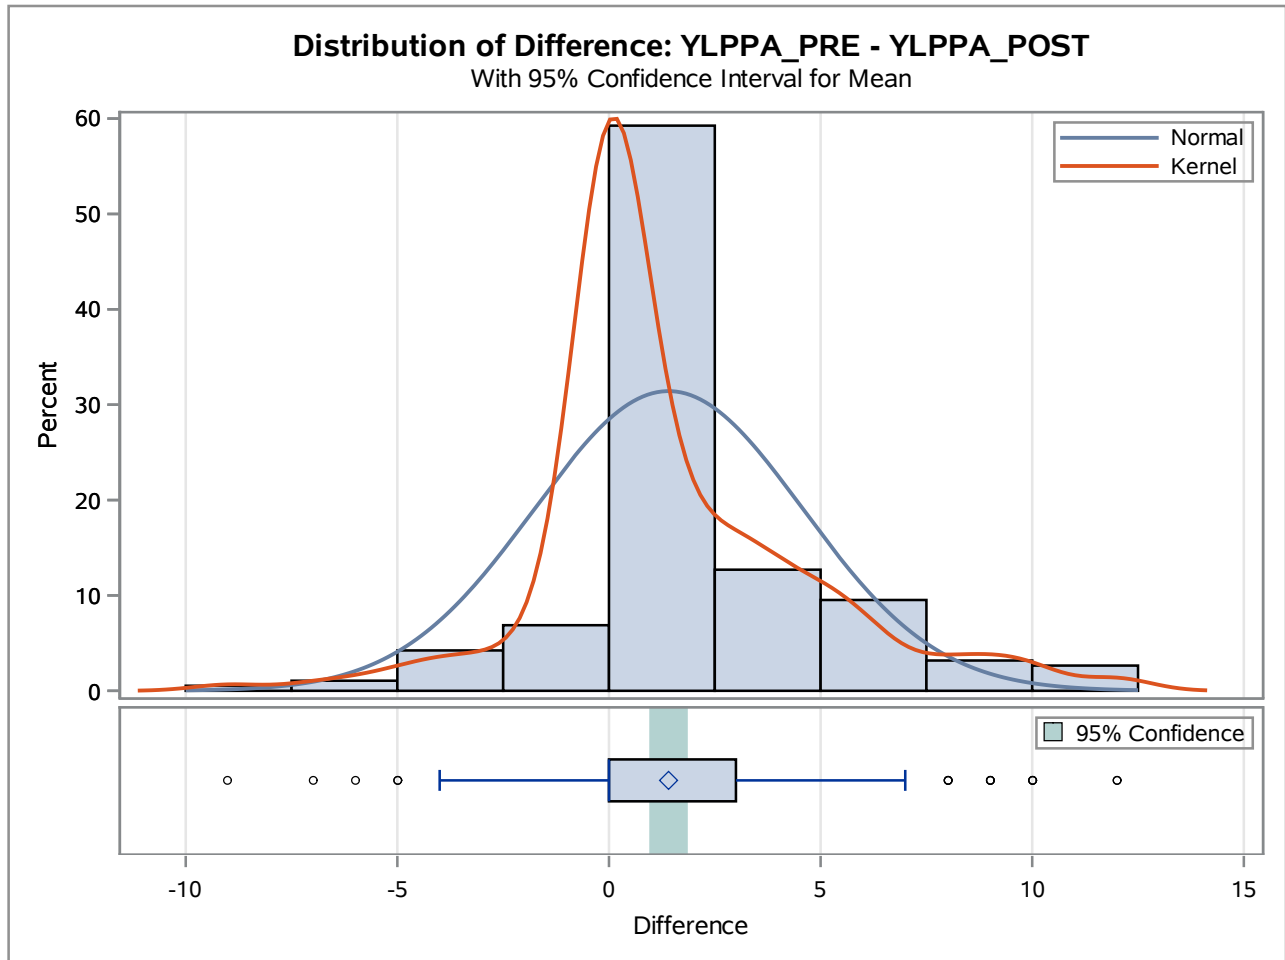

Difference: YLPPA\_PRE - YLPPA\_POST

Difference: YLPPA\_PRE - YLPPA\_POST

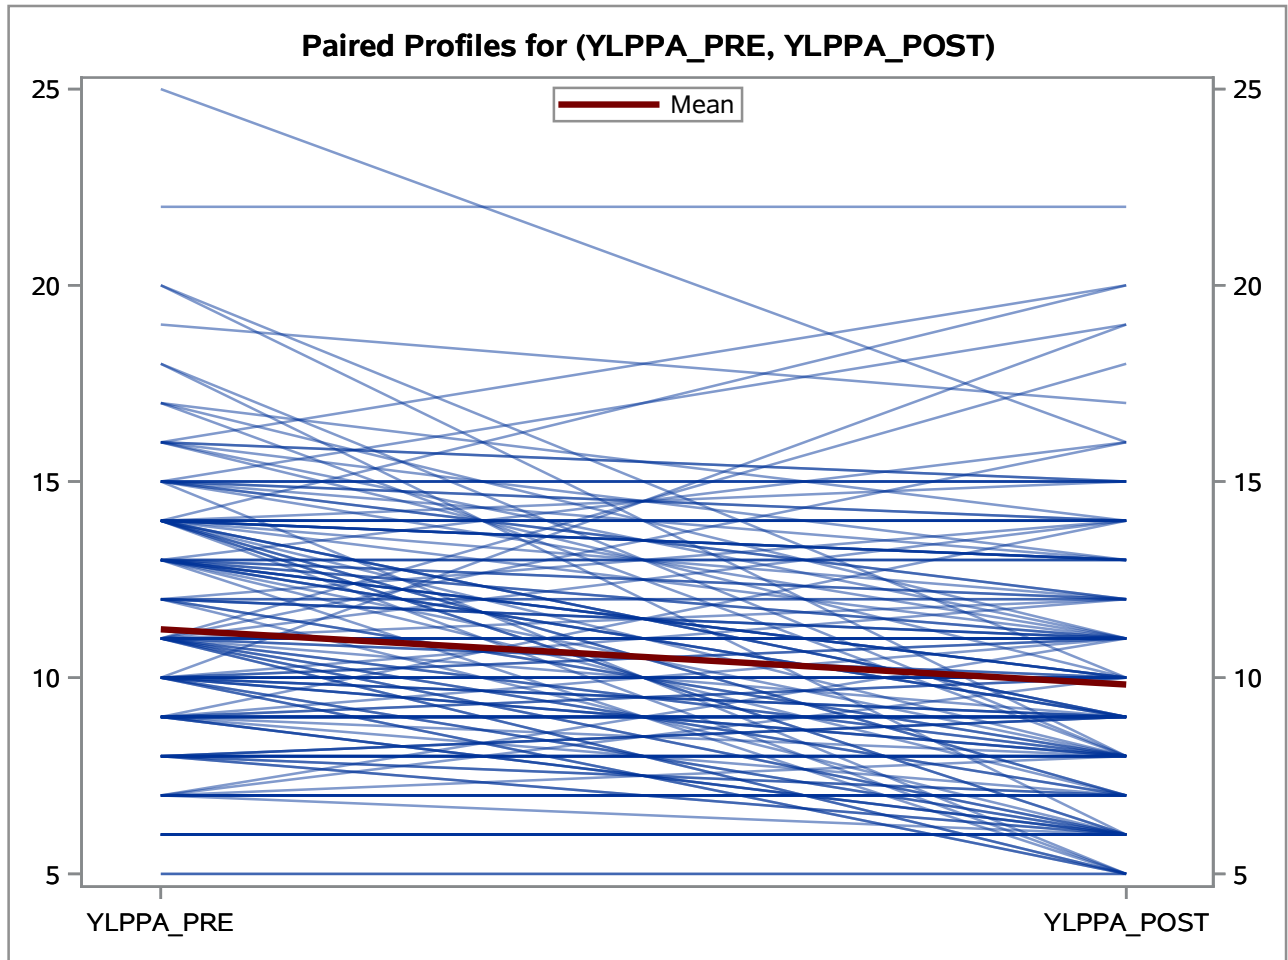

Difference: YLPPA\_PRE - YLPPA\_POST

Difference: YLPPA\_PRE - YLPPA\_POST

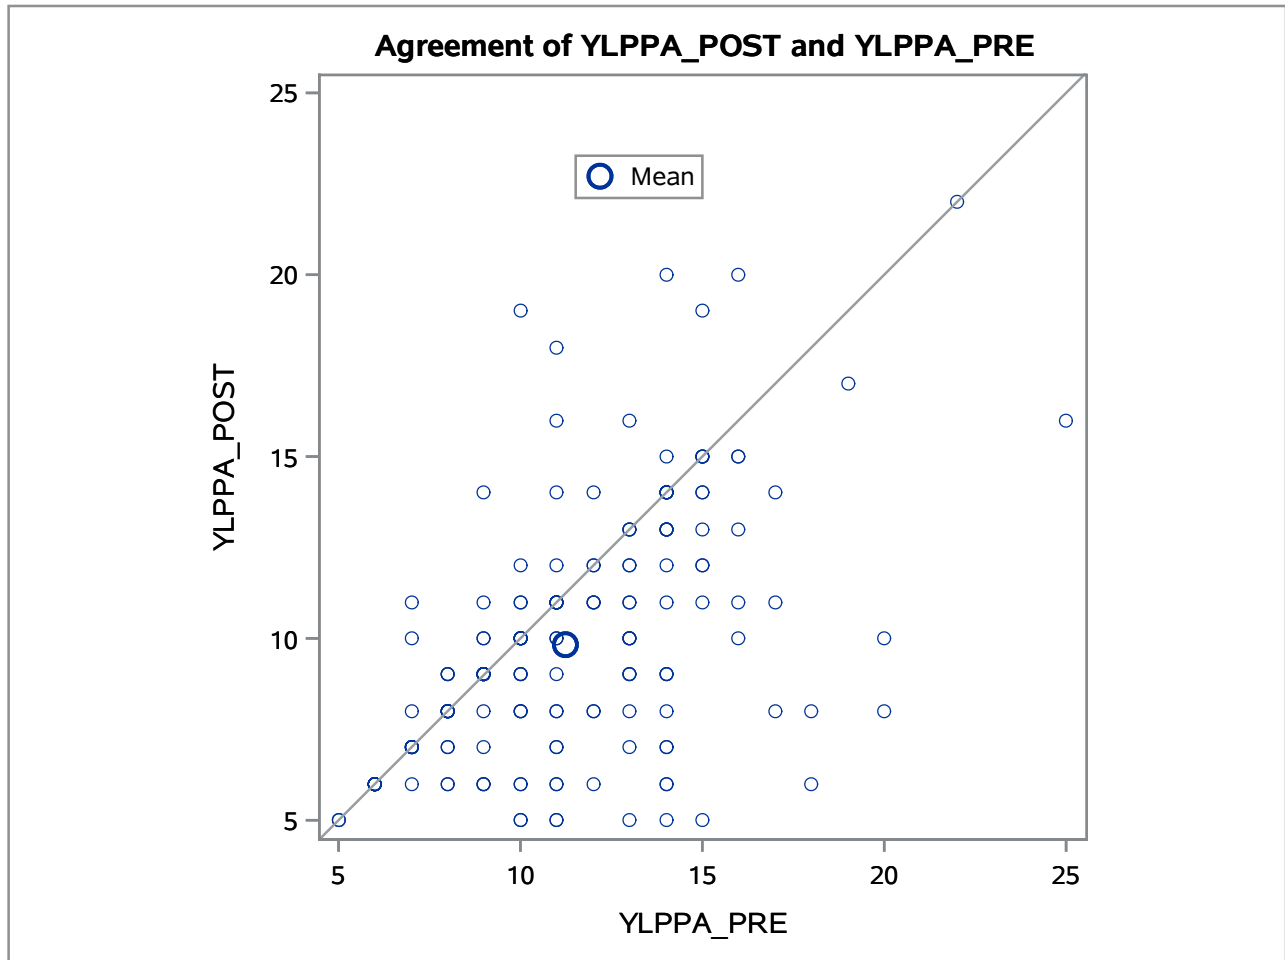

Difference: YLPPA\_PRE - YLPPA\_POST

Difference: YLPPA\_PRE - YLPPA\_POST

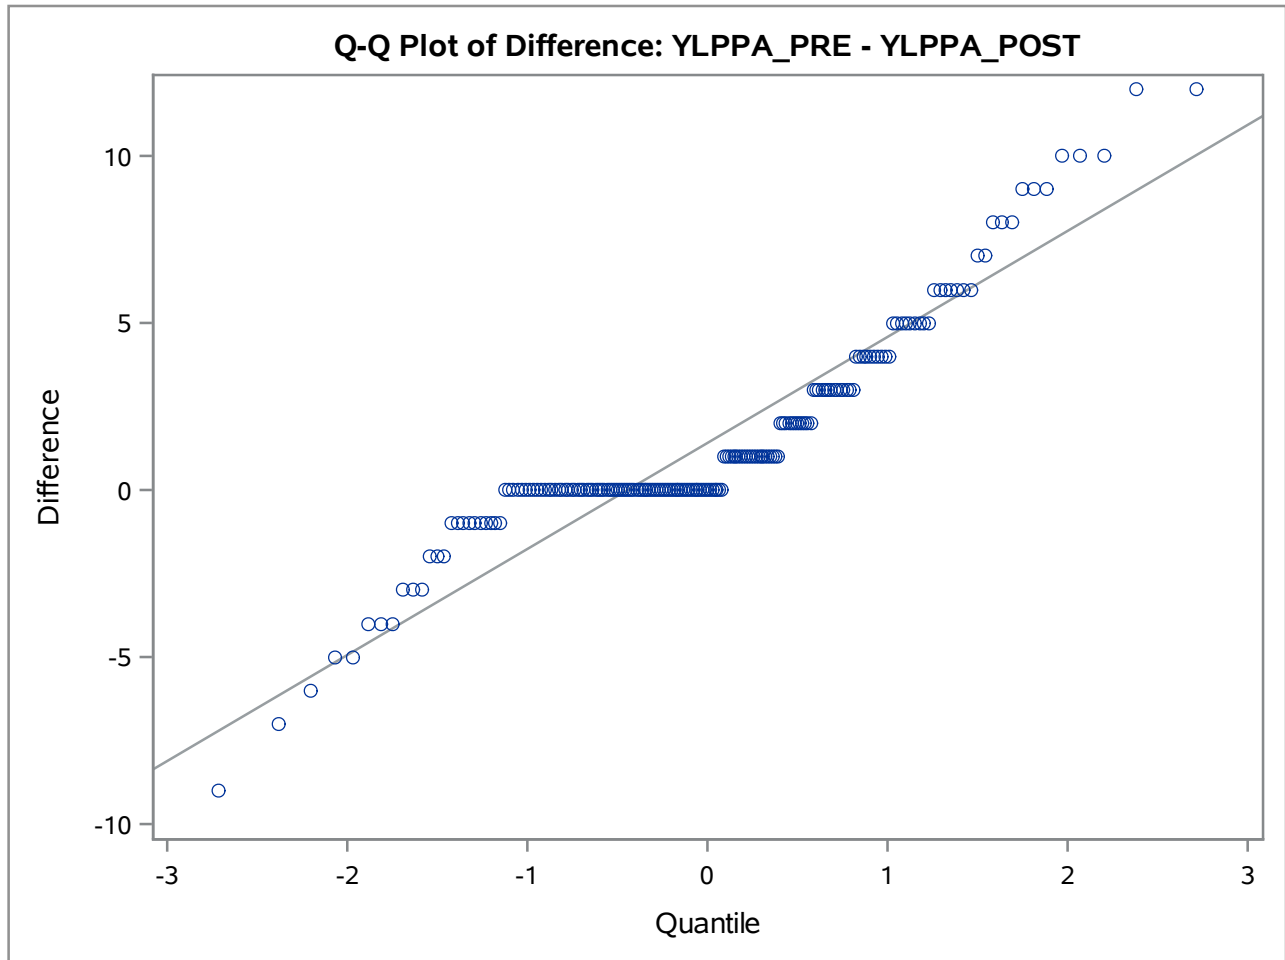

Difference: YLPPA\_PRE - YLPPA\_POST

| N   | Mean   | Std Dev | Std Err | Minimum | Maximum |
|-----|--------|---------|---------|---------|---------|
| 111 | 3.7748 | 2.1049  | 0.1998  | -1.0000 | 13.0000 |

| Mean   | 95% CL Mean   | Std Dev | 95% CL Std Dev |
|--------|---------------|---------|----------------|
| 3.7748 | 3.3788 4.1707 | 2.1049  | 1.8597 2.4251  |

| DF  | t Value | Pr >  t |
|-----|---------|---------|
| 110 | 18.89   | <.0001  |

Difference: YLPPA\_PRE - YLPPA\_POST

Difference: YLPPA\_PRE - YLPPA\_POST

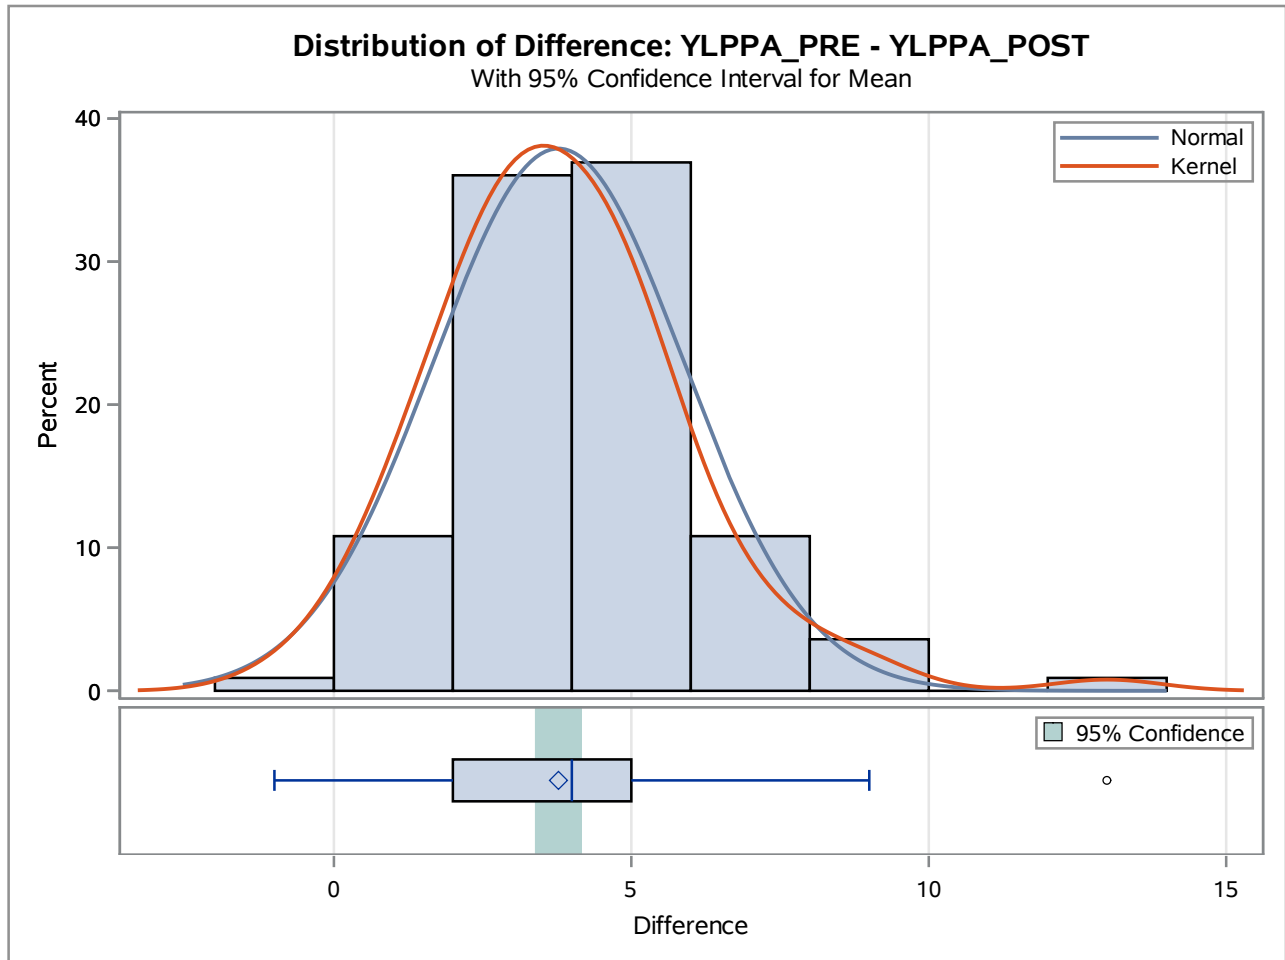



Difference: YLPPA\_PRE - YLPPA\_POST

Difference: YLPPA\_PRE - YLPPA\_POST

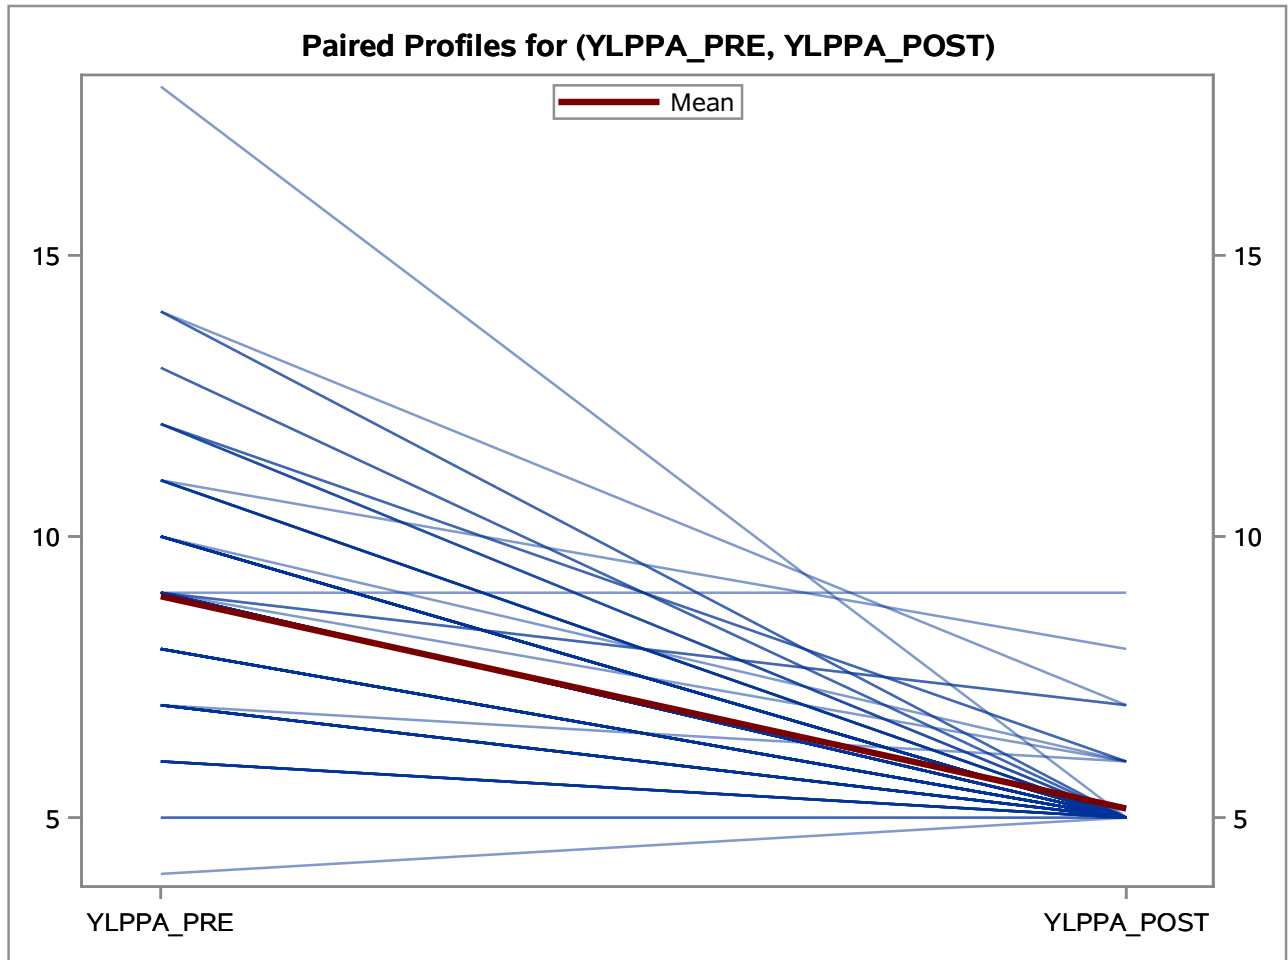

Difference: YLPPA\_PRE - YLPPA\_POST

Difference: YLPPA\_PRE - YLPPA\_POST

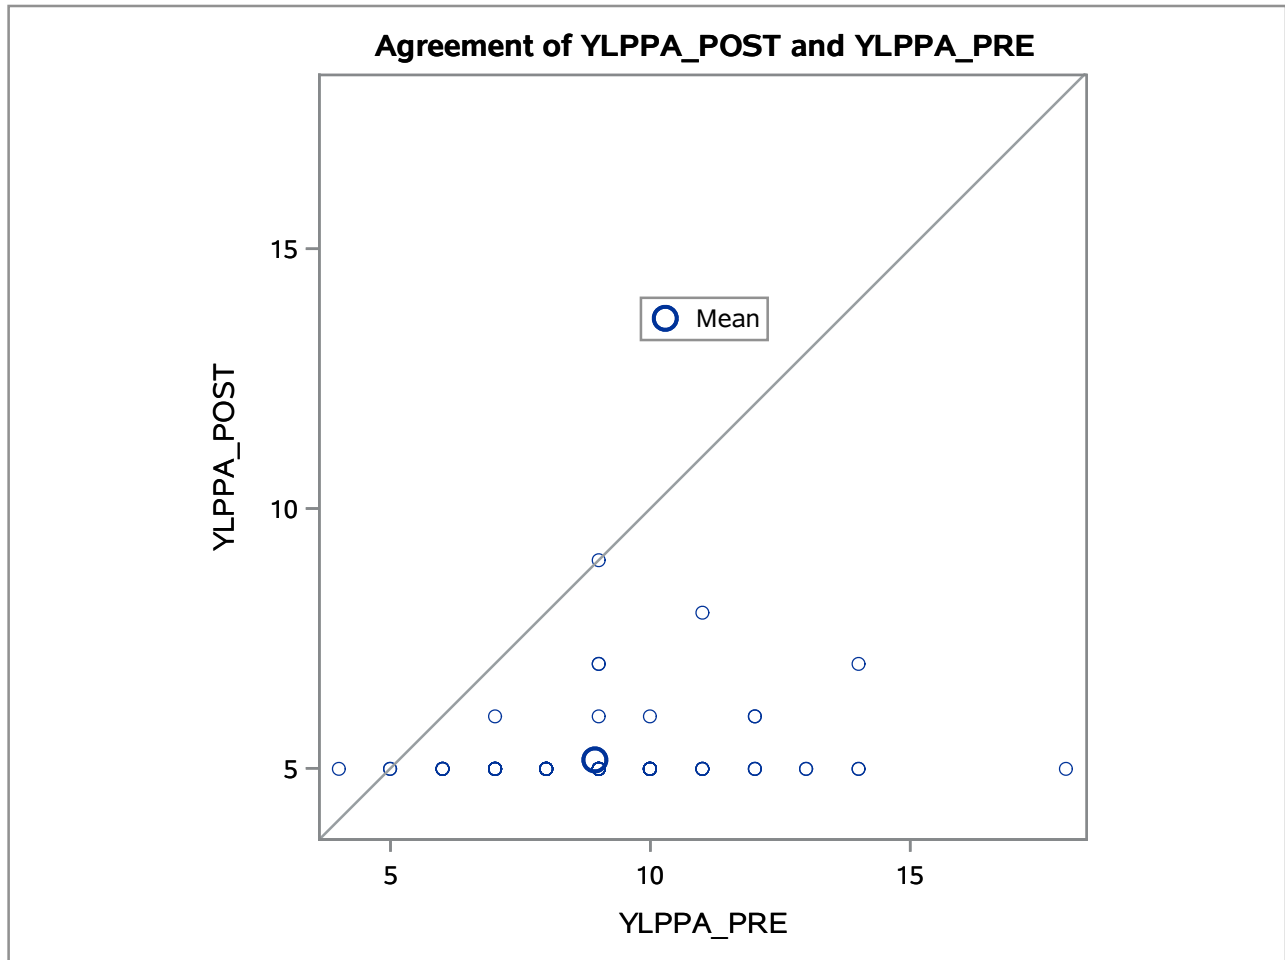

Difference: YLPPA\_PRE - YLPPA\_POST

Difference: YLPPA\_PRE - YLPPA\_POST

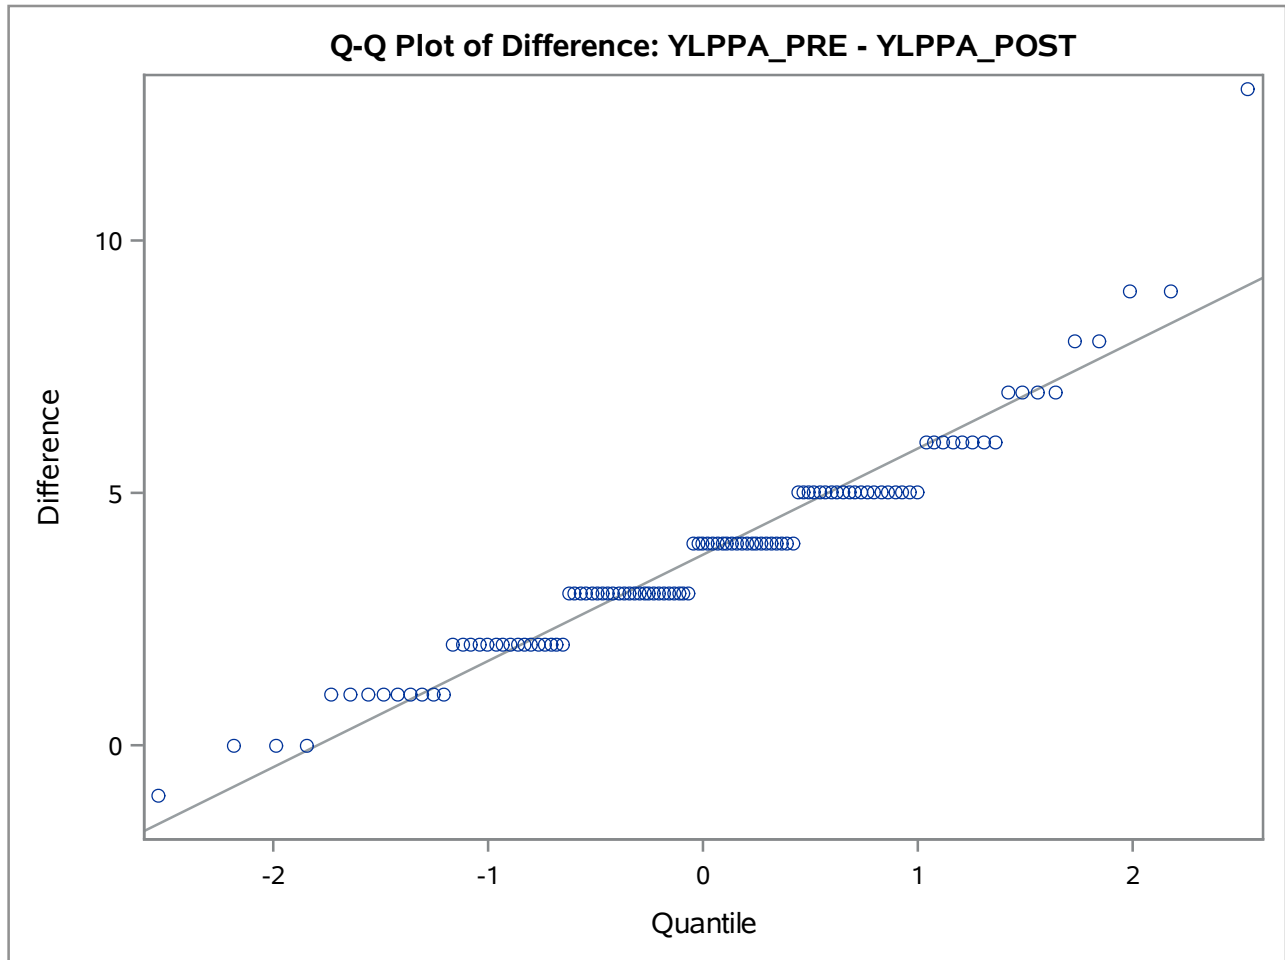

Difference: YLPAP\_PRE - YLPAP\_POST

| N   | Mean   | Std Dev | Std Err | Minimum | Maximum |
|-----|--------|---------|---------|---------|---------|
| 189 | 1.7090 | 2.0356  | 0.1481  | -5.0000 | 8.0000  |

| Mean   | 95% CL Mean   | Std Dev | 95% CL Std Dev |
|--------|---------------|---------|----------------|
| 1.7090 | 1.4169 2.0011 | 2.0356  | 1.8490 2.2644  |

| DF  | t Value | Pr >  t |
|-----|---------|---------|
| 188 | 11.54   | <.0001  |

Difference: YLPAP\_PRE - YLPAP\_POST

Difference: YLPAP\_PRE - YLPAP\_POST

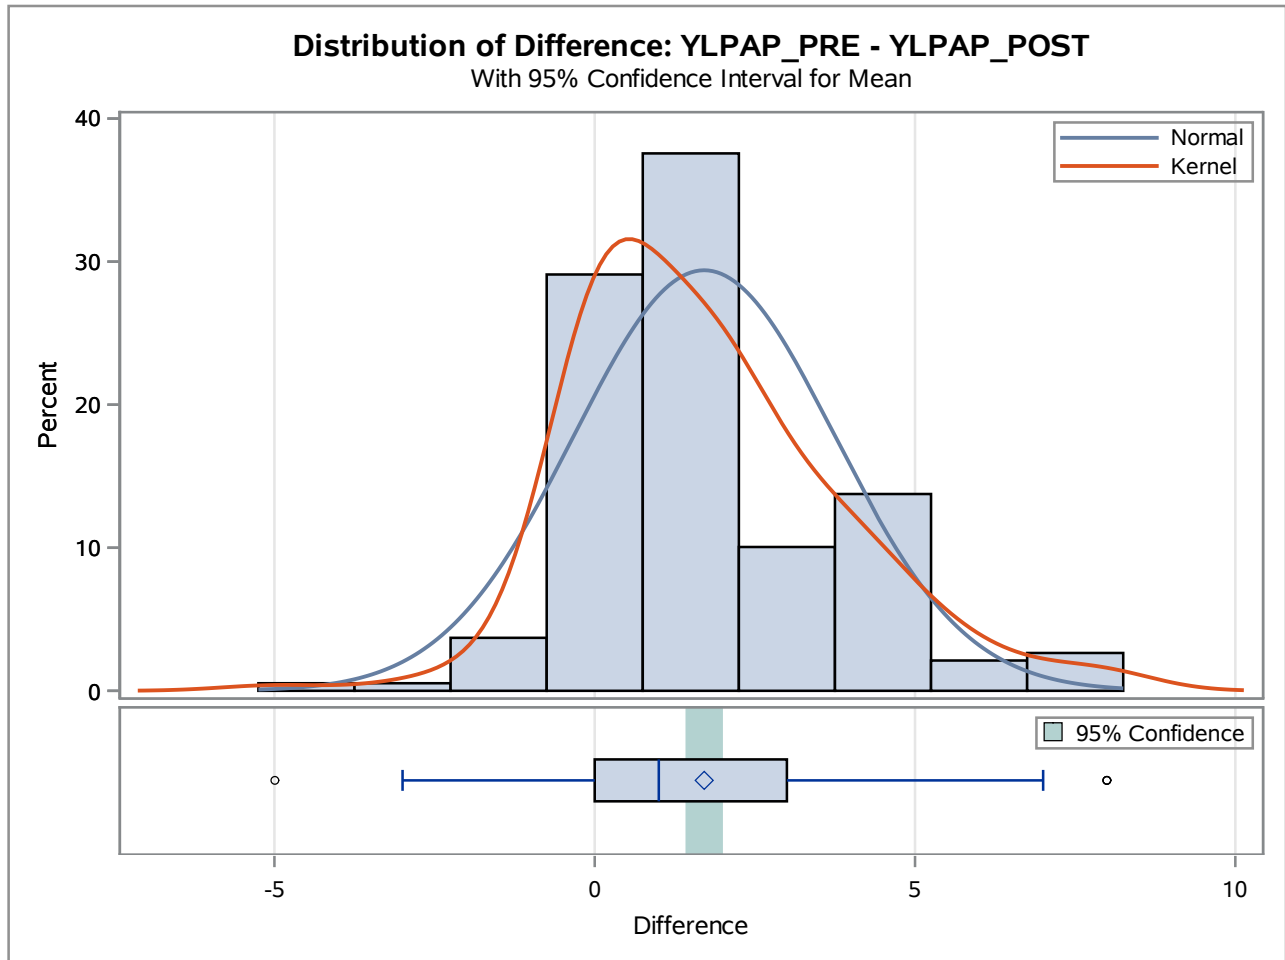

Difference: YLPAP\_PRE - YLPAP\_POST

Difference: YLPAP\_PRE - YLPAP\_POST

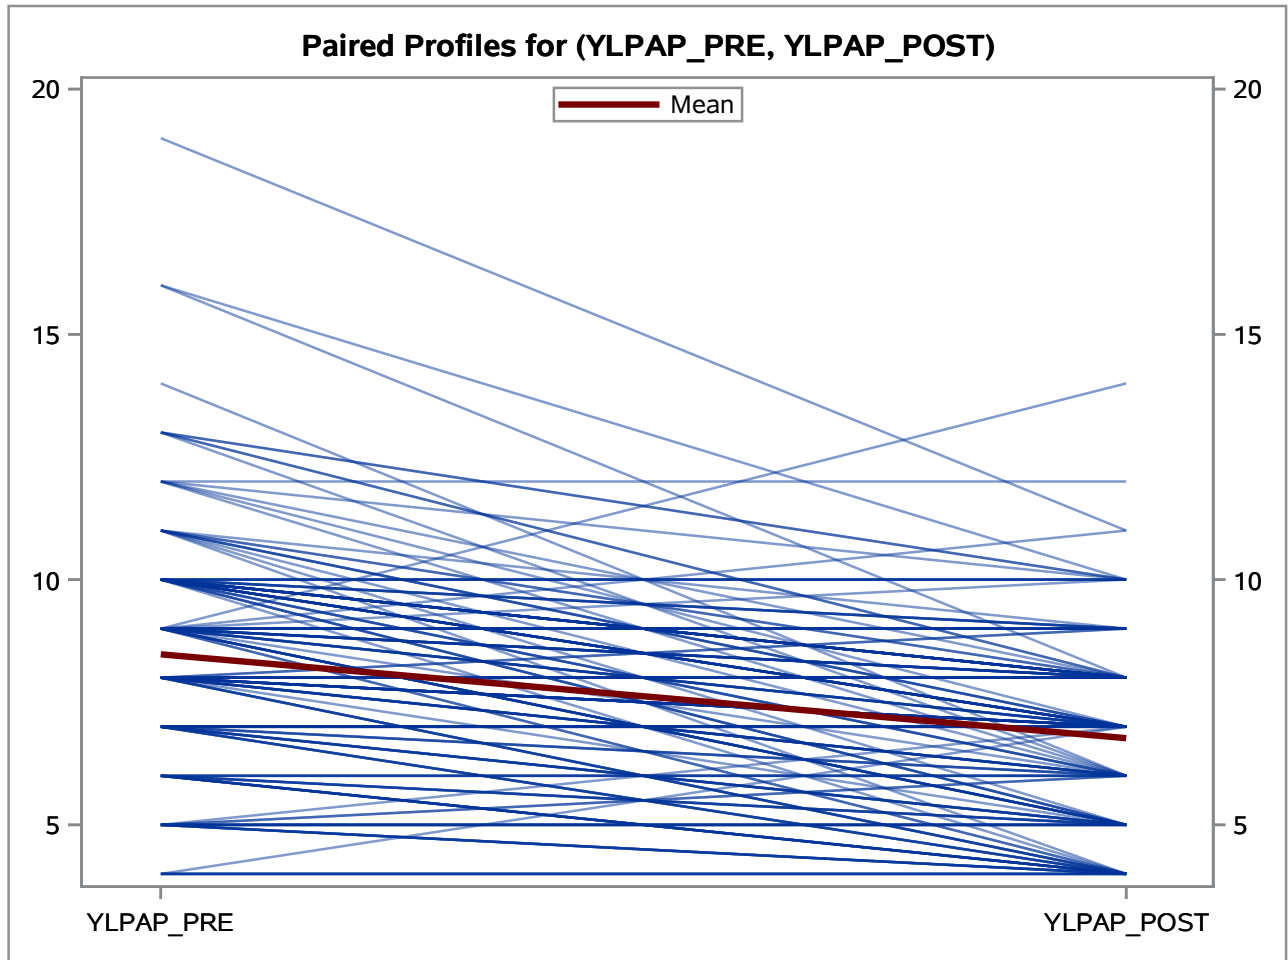

Difference: YLPAP\_PRE - YLPAP\_POST

Difference: YLPAP\_PRE - YLPAP\_POST

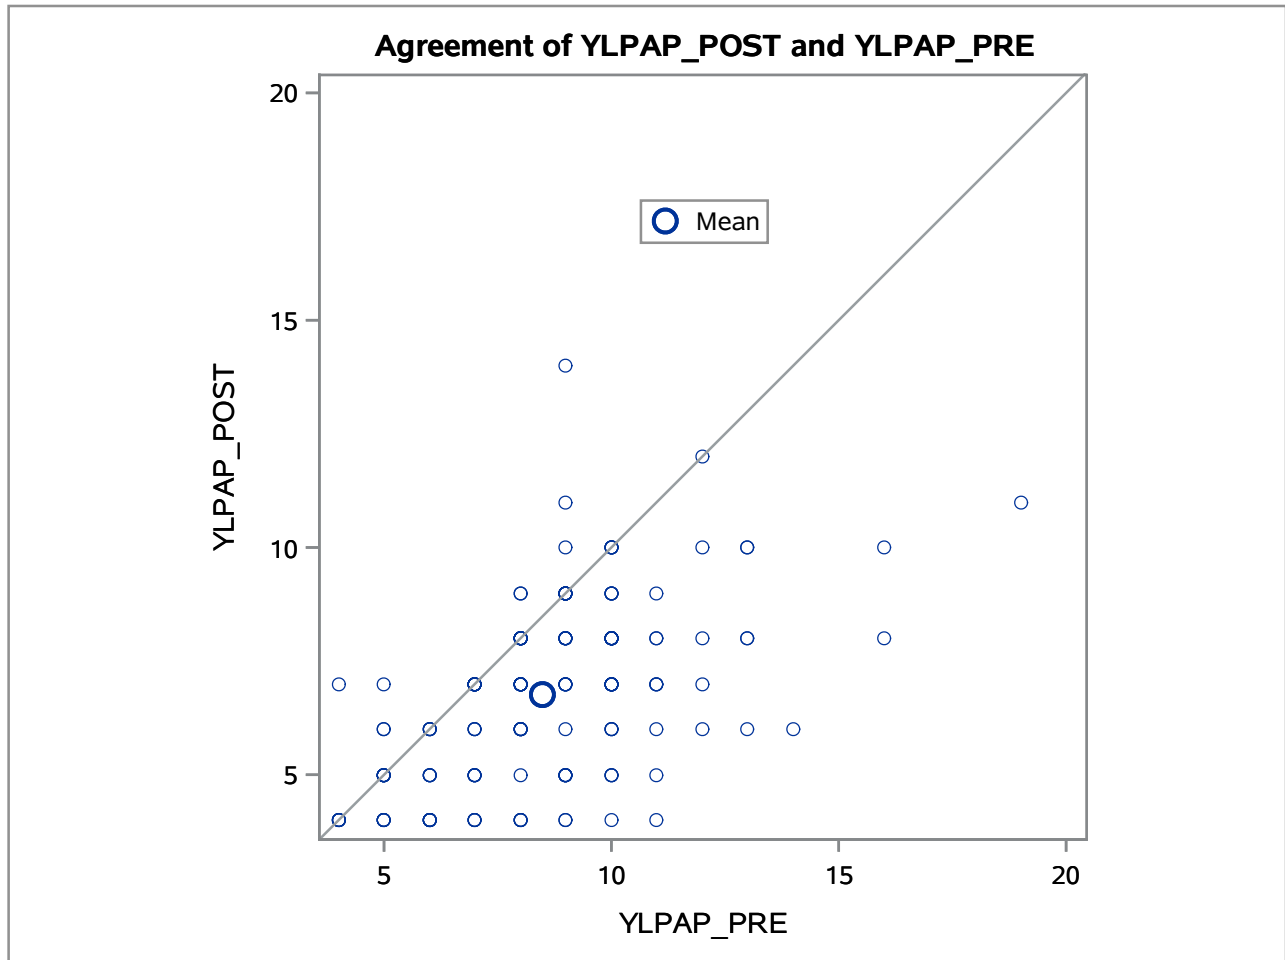

Difference: YLPAP\_PRE - YLPAP\_POST

Difference: YLPAP\_PRE - YLPAP\_POST

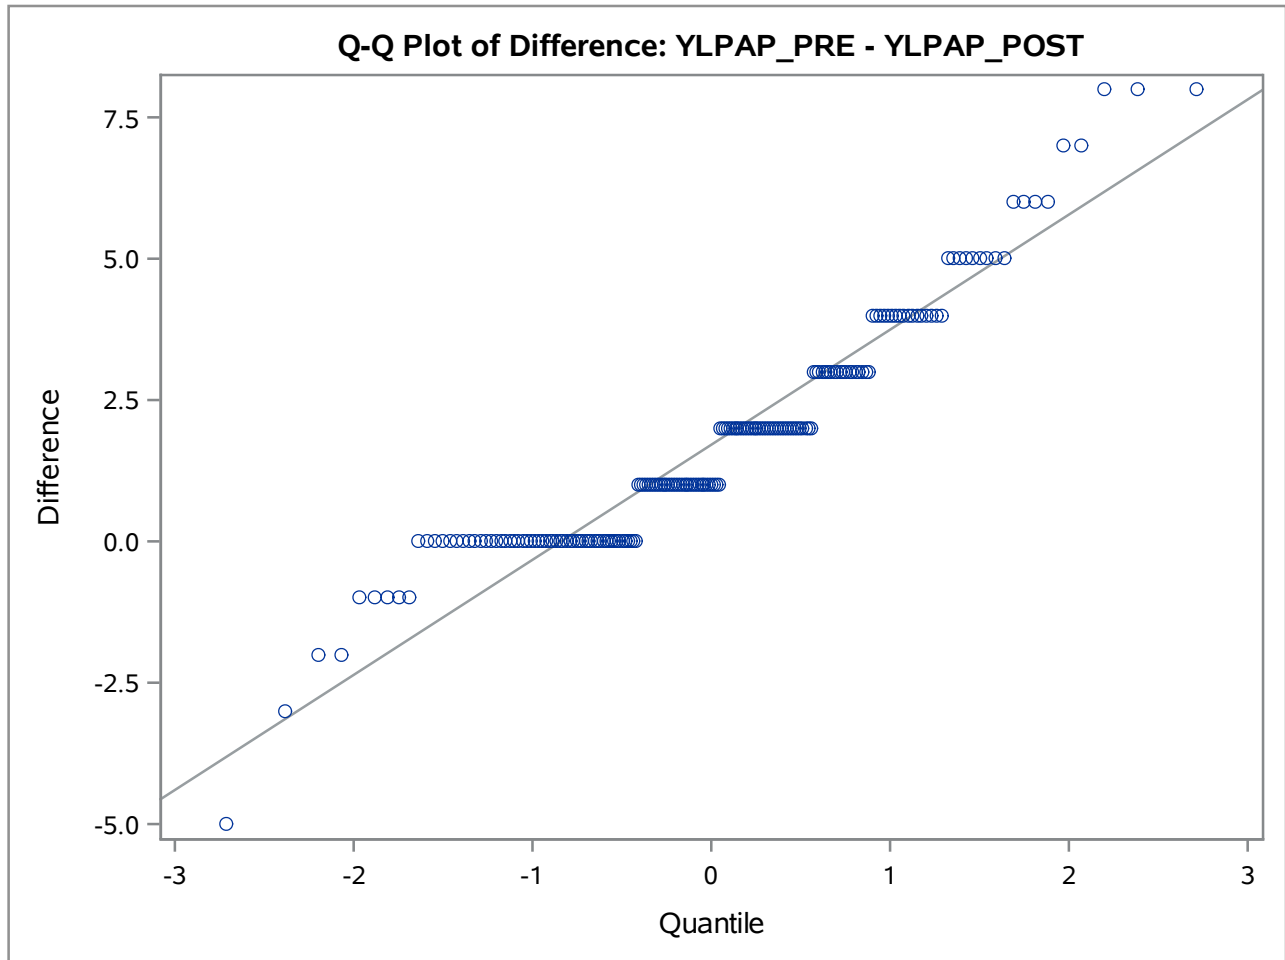

Difference: YLPAP\_PRE - YLPAP\_POST

| N   | Mean   | Std Dev | Std Err | Minimum | Maximum |
|-----|--------|---------|---------|---------|---------|
| 111 | 1.8919 | 2.0598  | 0.1955  | -1.0000 | 12.0000 |

| Mean   | 95% CL Mean   | Std Dev | 95% CL Std Dev |
|--------|---------------|---------|----------------|
| 1.8919 | 1.5044 2.2793 | 2.0598  | 1.8199 2.3732  |

| DF  | t Value | Pr >  t |
|-----|---------|---------|
| 110 | 9.68    | <.0001  |

Difference: YLPAP\_PRE - YLPAP\_POST

Difference: YLPAP\_PRE - YLPAP\_POST

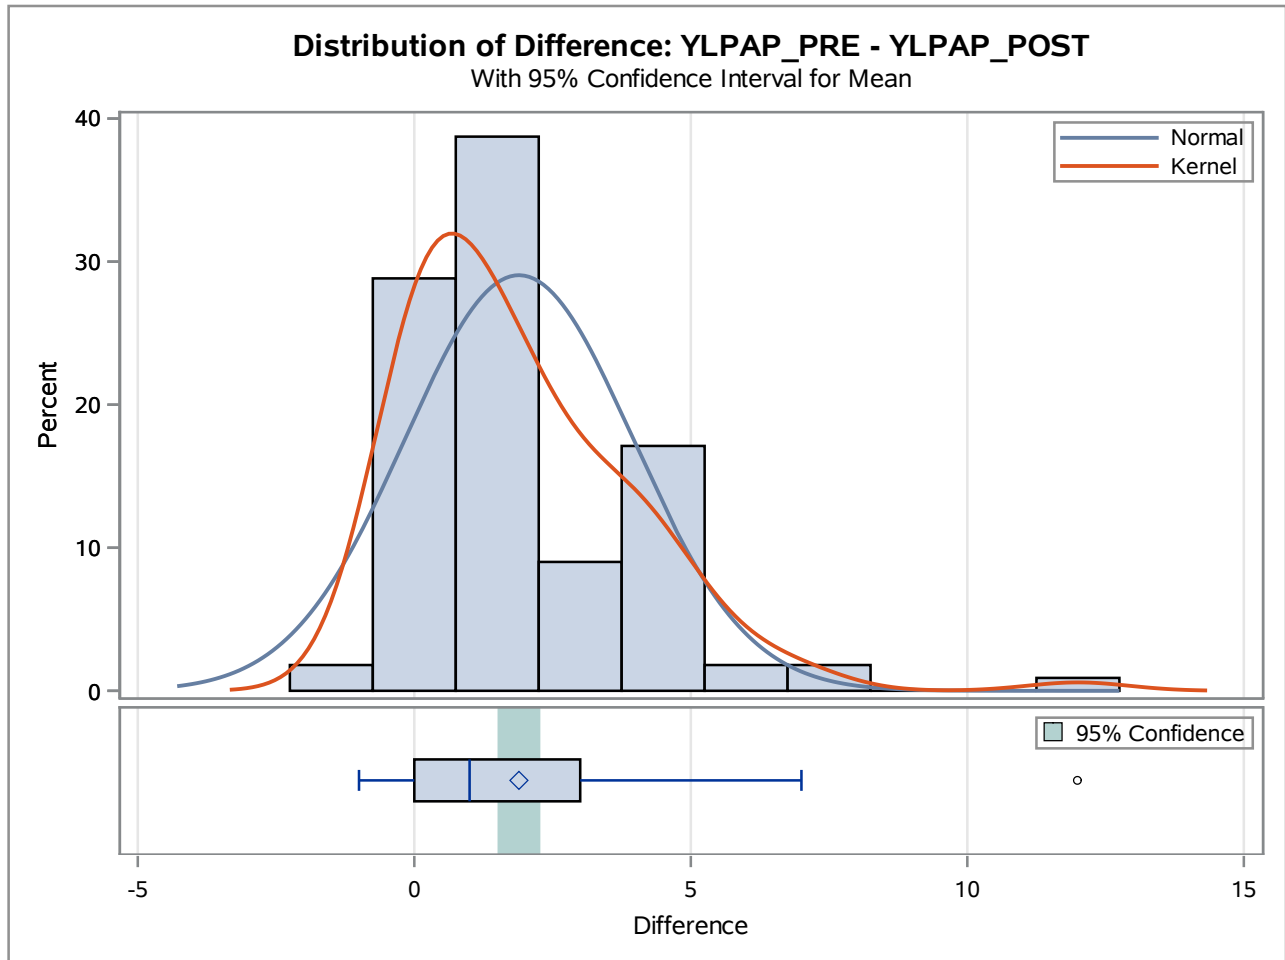



Difference: YLPAP\_PRE - YLPAP\_POST

Difference: YLPAP\_PRE - YLPAP\_POST

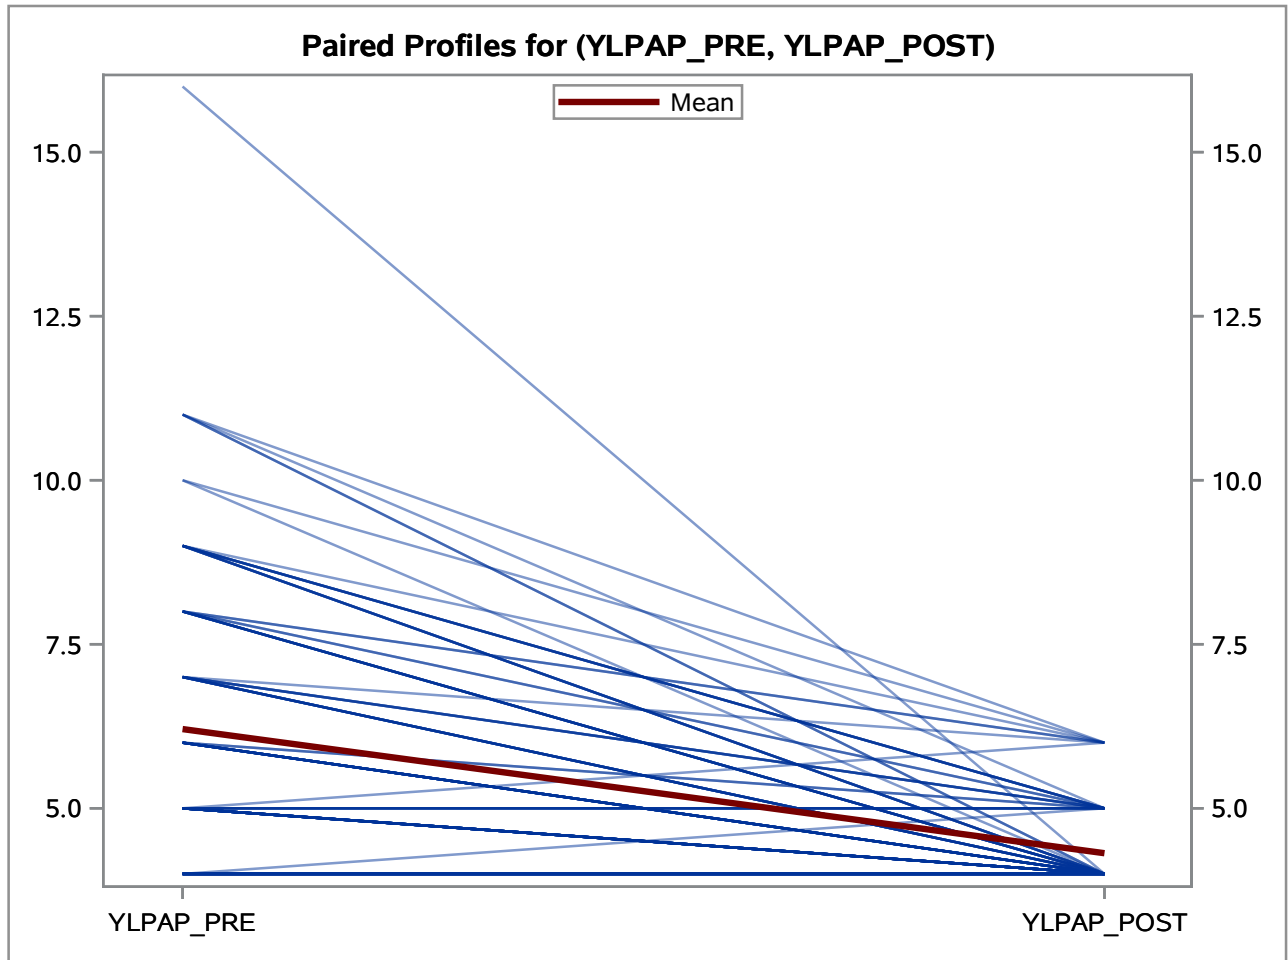

Difference: YLPAP\_PRE - YLPAP\_POST

Difference: YLPAP\_PRE - YLPAP\_POST

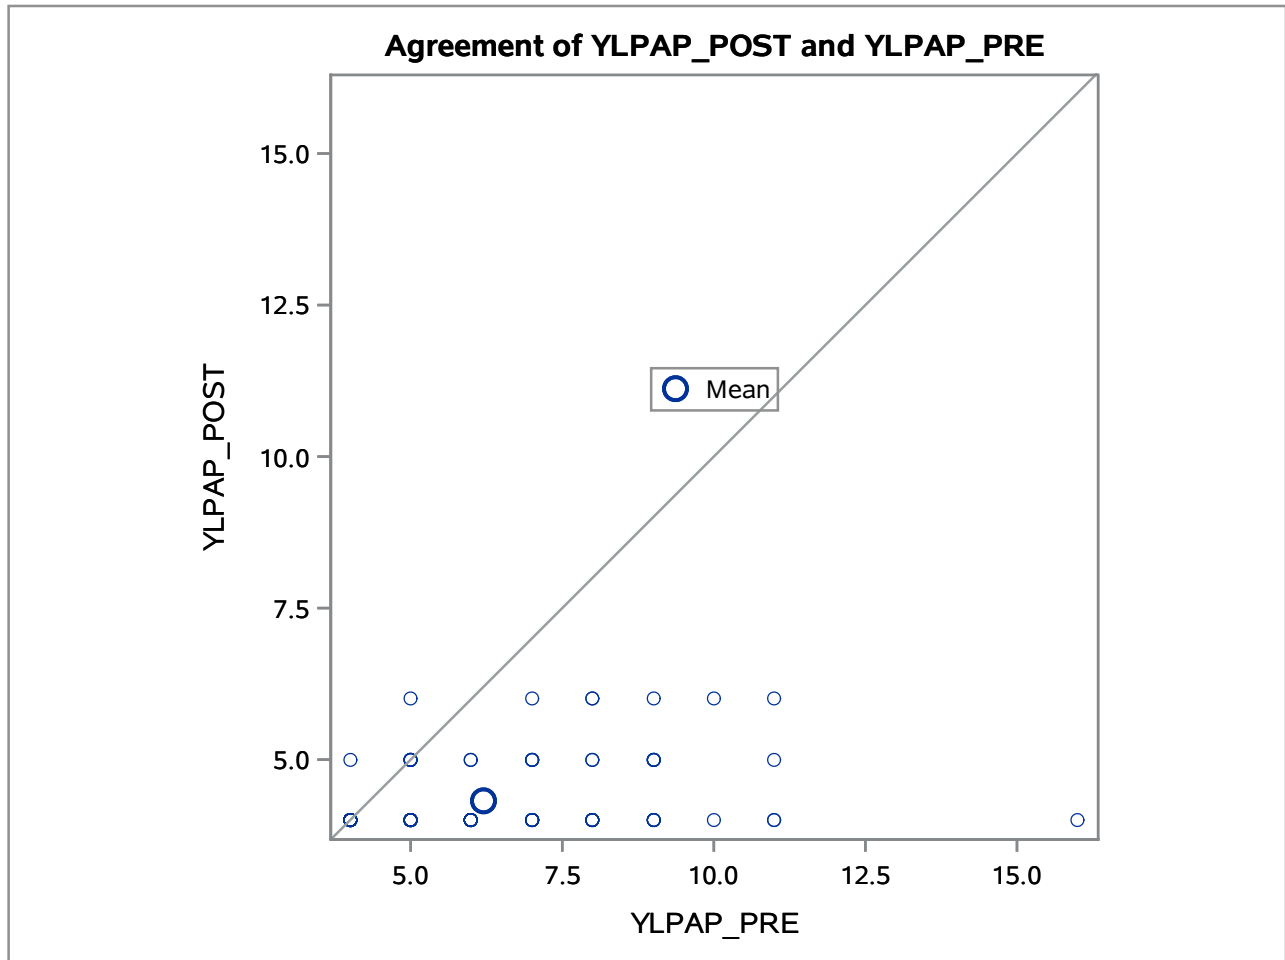

Difference: YLPAP\_PRE - YLPAP\_POST

Difference: YLPAP\_PRE - YLPAP\_POST

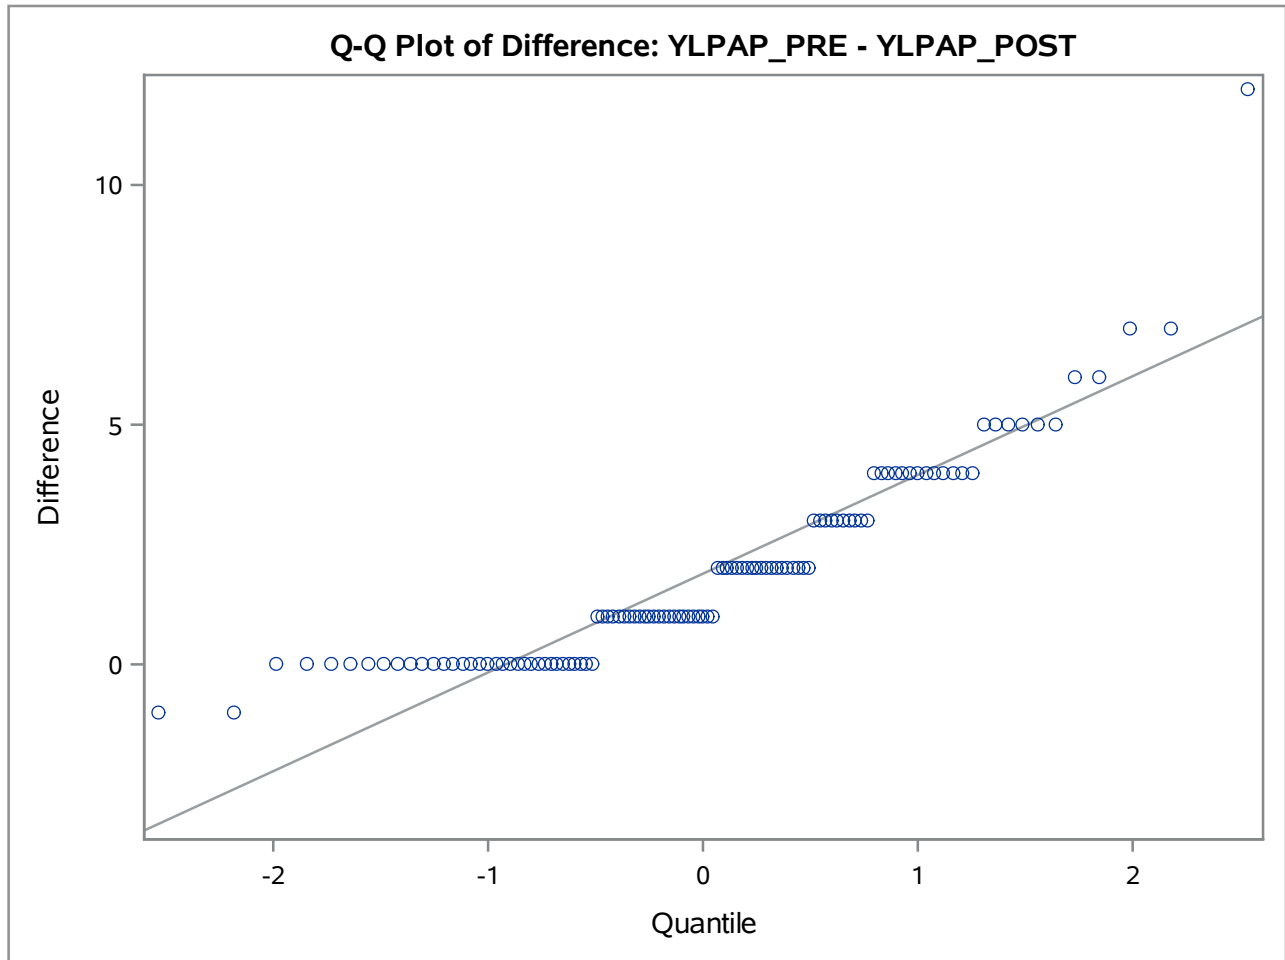

Difference: YLPDIET\_PRE - YLPDIET\_POST

| N   | Mean   | Std Dev | Std Err | Minimum  | Maximum |
|-----|--------|---------|---------|----------|---------|
| 189 | 0.3439 | 4.5795  | 0.3331  | -16.0000 | 25.0000 |

| Mean   | 95% CL Mean | Std Dev | 95% CL Std Dev |
|--------|-------------|---------|----------------|
| 0.3439 | -0.3132     | 1.0010  | 4.5795         |

| DF  | t Value | Pr >  t |
|-----|---------|---------|
| 188 | 1.03    | 0.3032  |

Difference: YLPDIET\_PRE - YLPDIET\_POST

Difference: YLPDIET\_PRE - YLPDIET\_POST

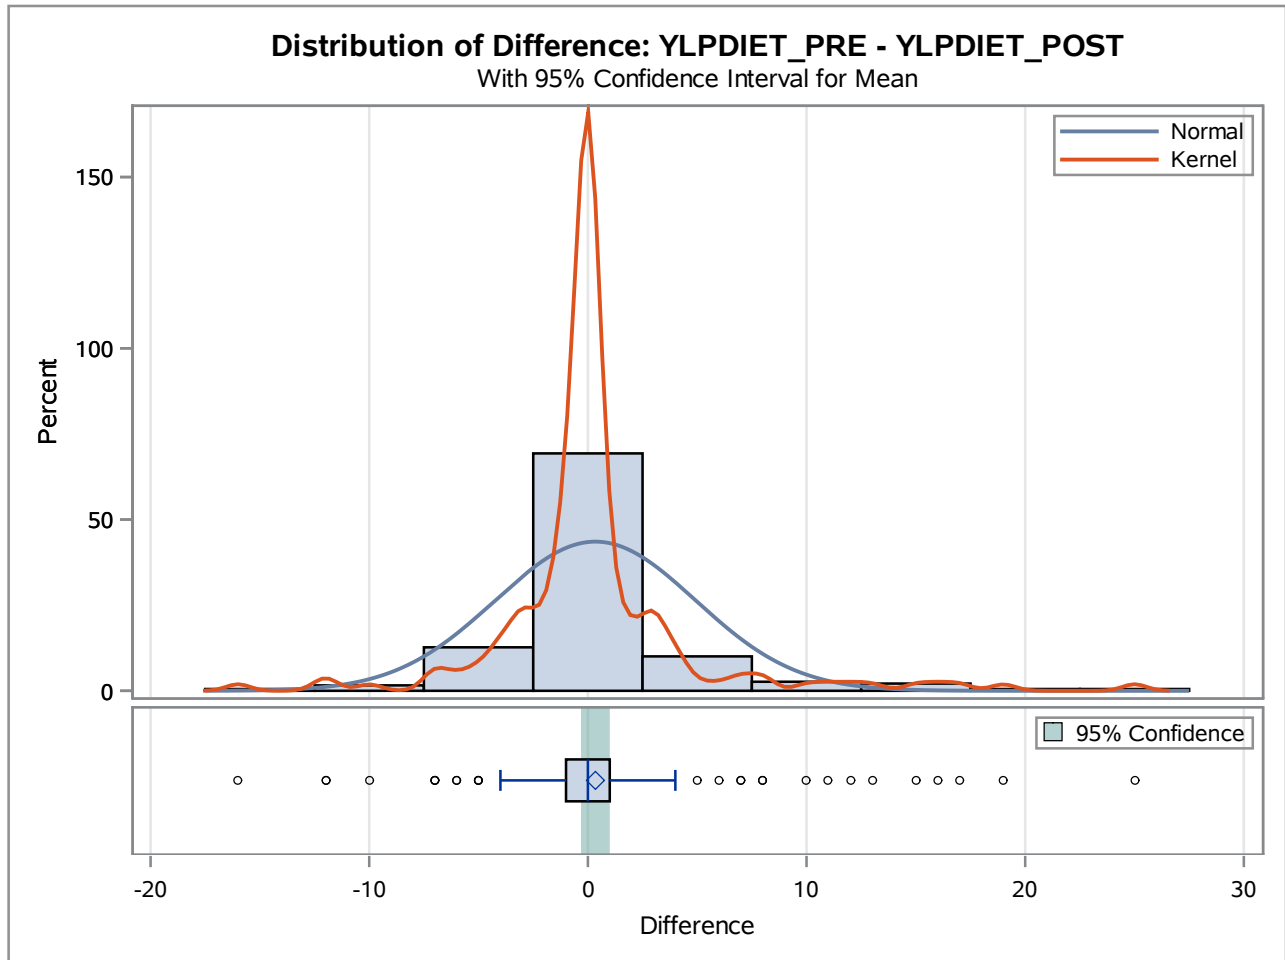

Difference: YLPDIET\_PRE - YLPDIET\_POST

Difference: YLPDIET\_PRE - YLPDIET\_POST

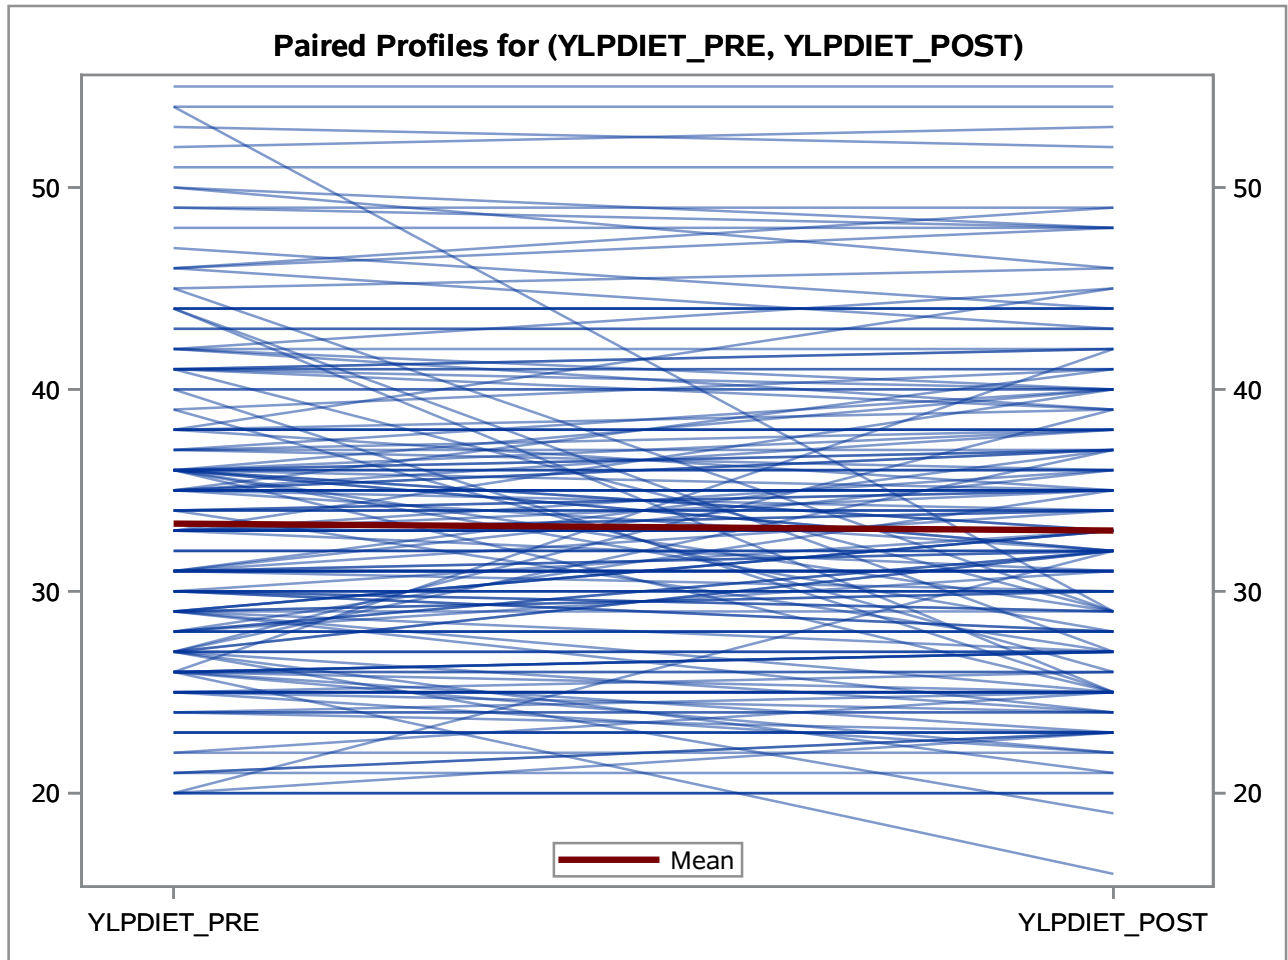

Difference: YLPDIET\_PRE - YLPDIET\_POST

Difference: YLPDIET\_PRE - YLPDIET\_POST

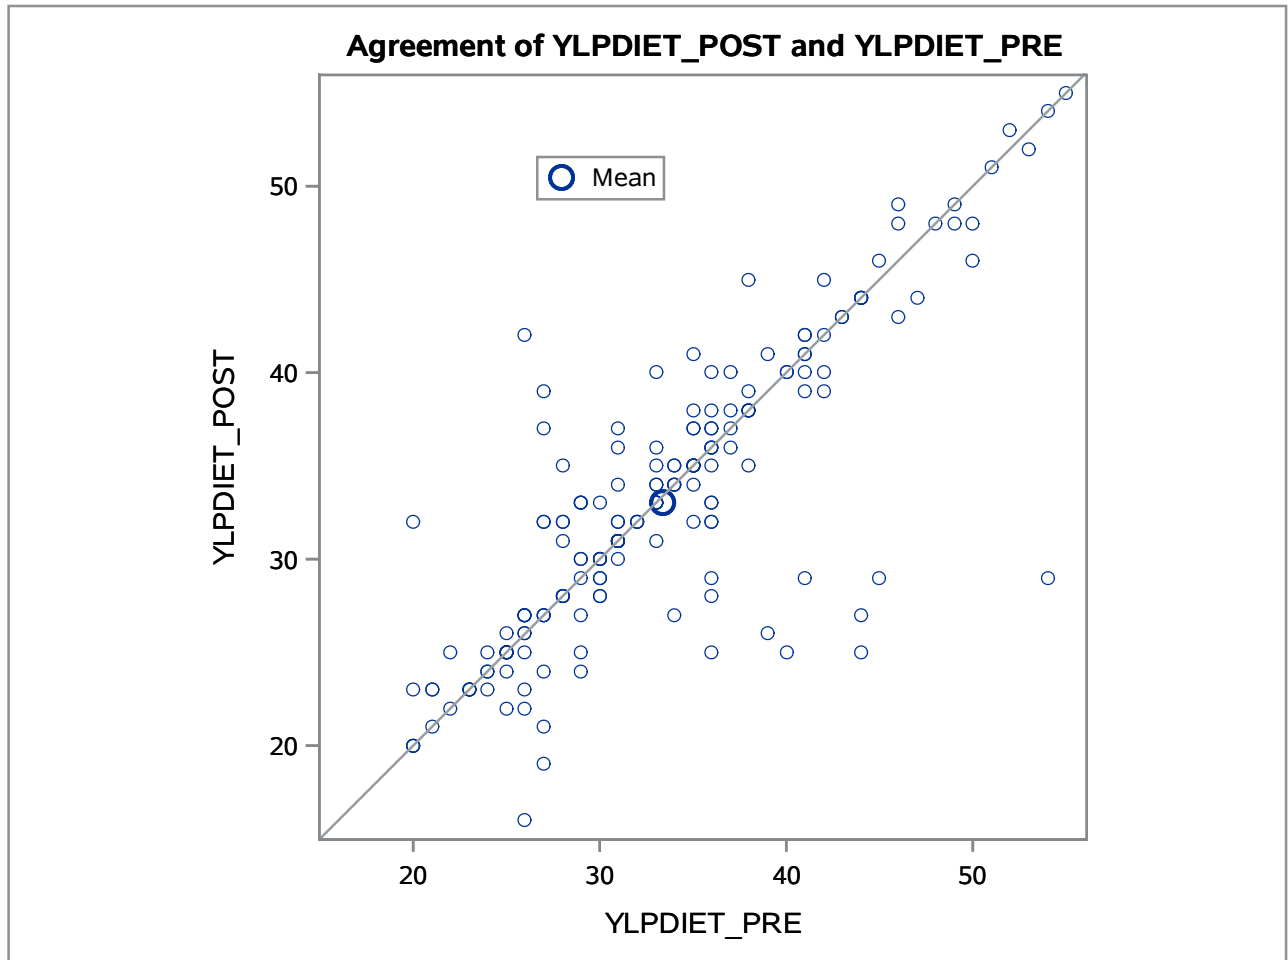

Difference: YLPDIET\_PRE - YLPDIET\_POST

Difference: YLPDIET\_PRE - YLPDIET\_POST

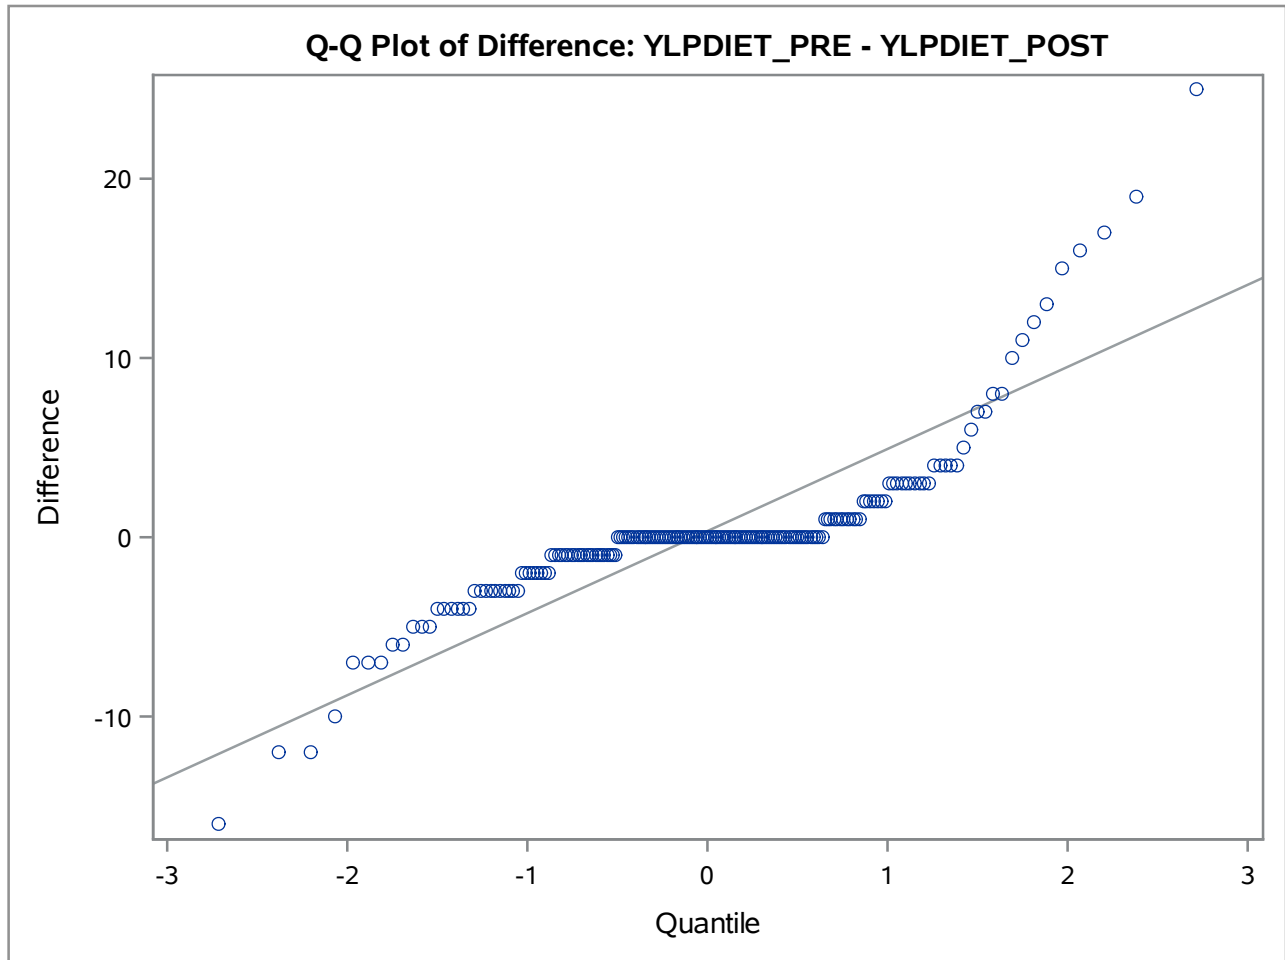

Difference: YLPDIET\_PRE - YLPDIET\_POST

| N   | Mean   | Std Dev | Std Err | Minimum | Maximum |
|-----|--------|---------|---------|---------|---------|
| 111 | 4.7387 | 5.0285  | 0.4773  | -6.0000 | 25.0000 |

| Mean   | 95% CL Mean   | Std Dev | 95% CL Std Dev |
|--------|---------------|---------|----------------|
| 4.7387 | 3.7929 5.6846 | 5.0285  | 4.4428 5.7935  |

| DF  | t Value | Pr >  t |
|-----|---------|---------|
| 110 | 9.93    | <.0001  |

Difference: YLPDIET\_PRE - YLPDIET\_POST

Difference: YLPDIET\_PRE - YLPDIET\_POST

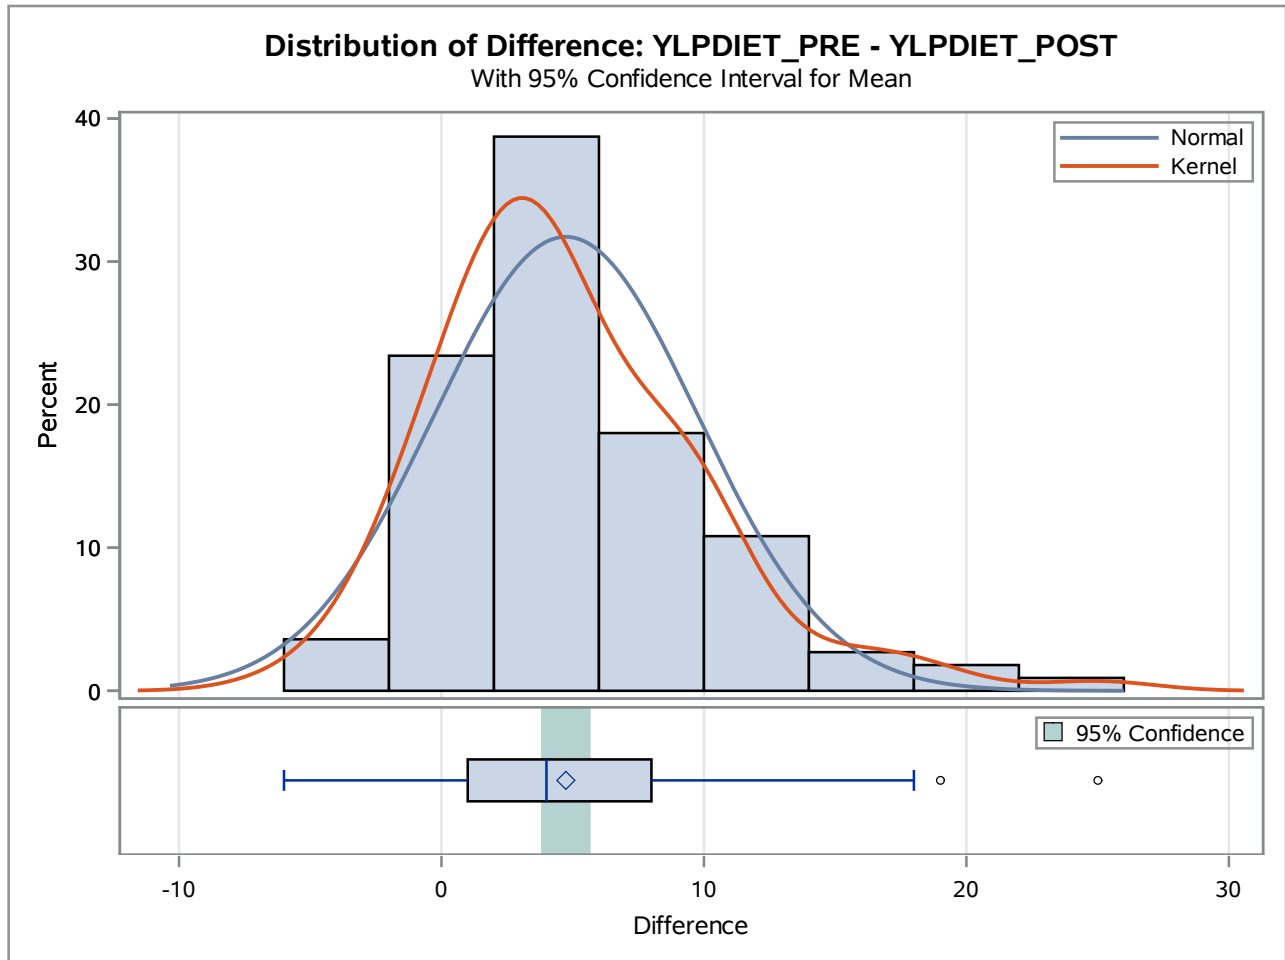



Difference: YLPDIET\_PRE - YLPDIET\_POST

Difference: YLPDIET\_PRE - YLPDIET\_POST

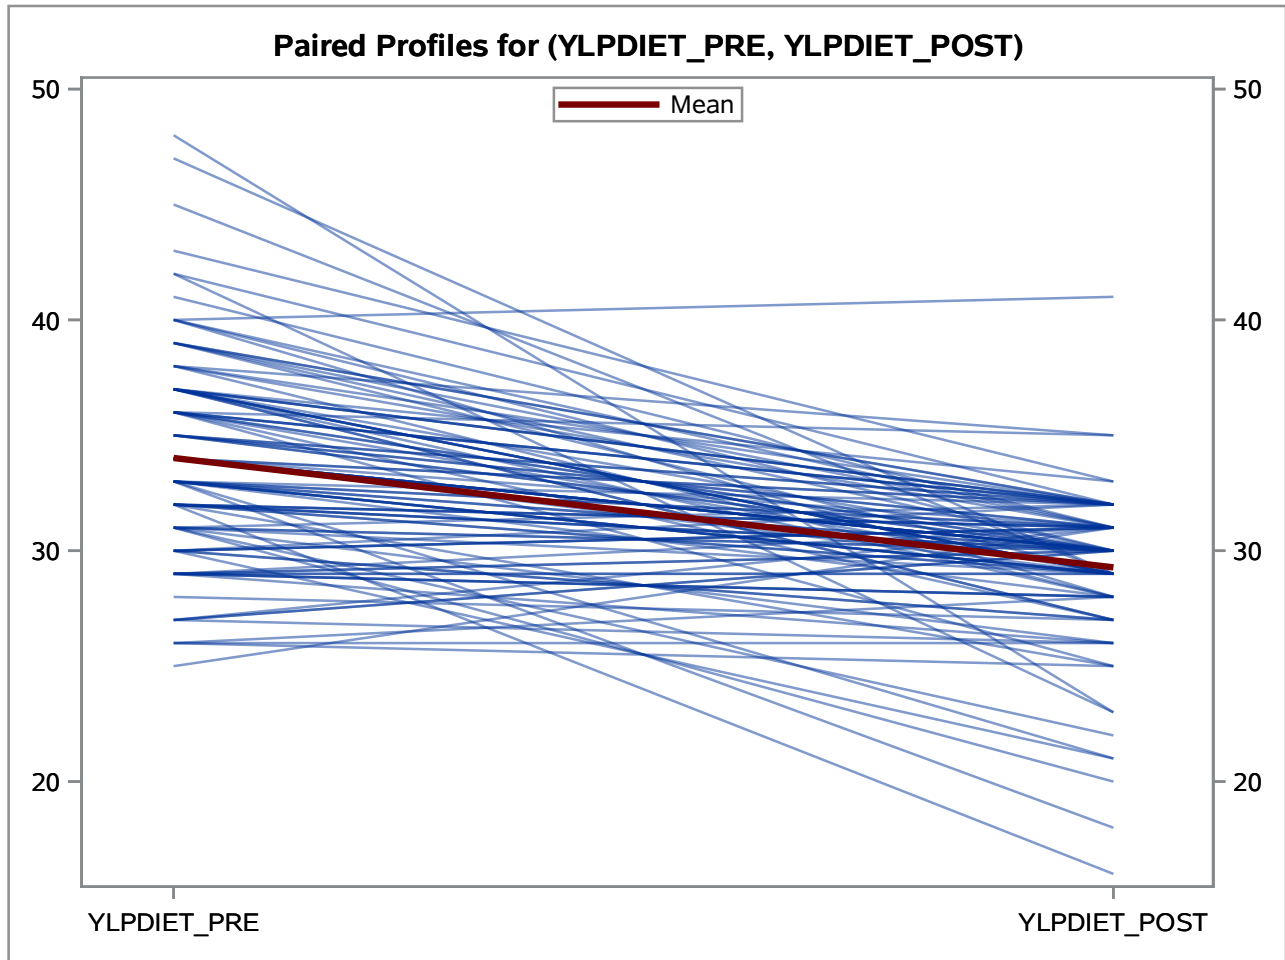

Difference: YLPDIET\_PRE - YLPDIET\_POST

Difference: YLPDIET\_PRE - YLPDIET\_POST

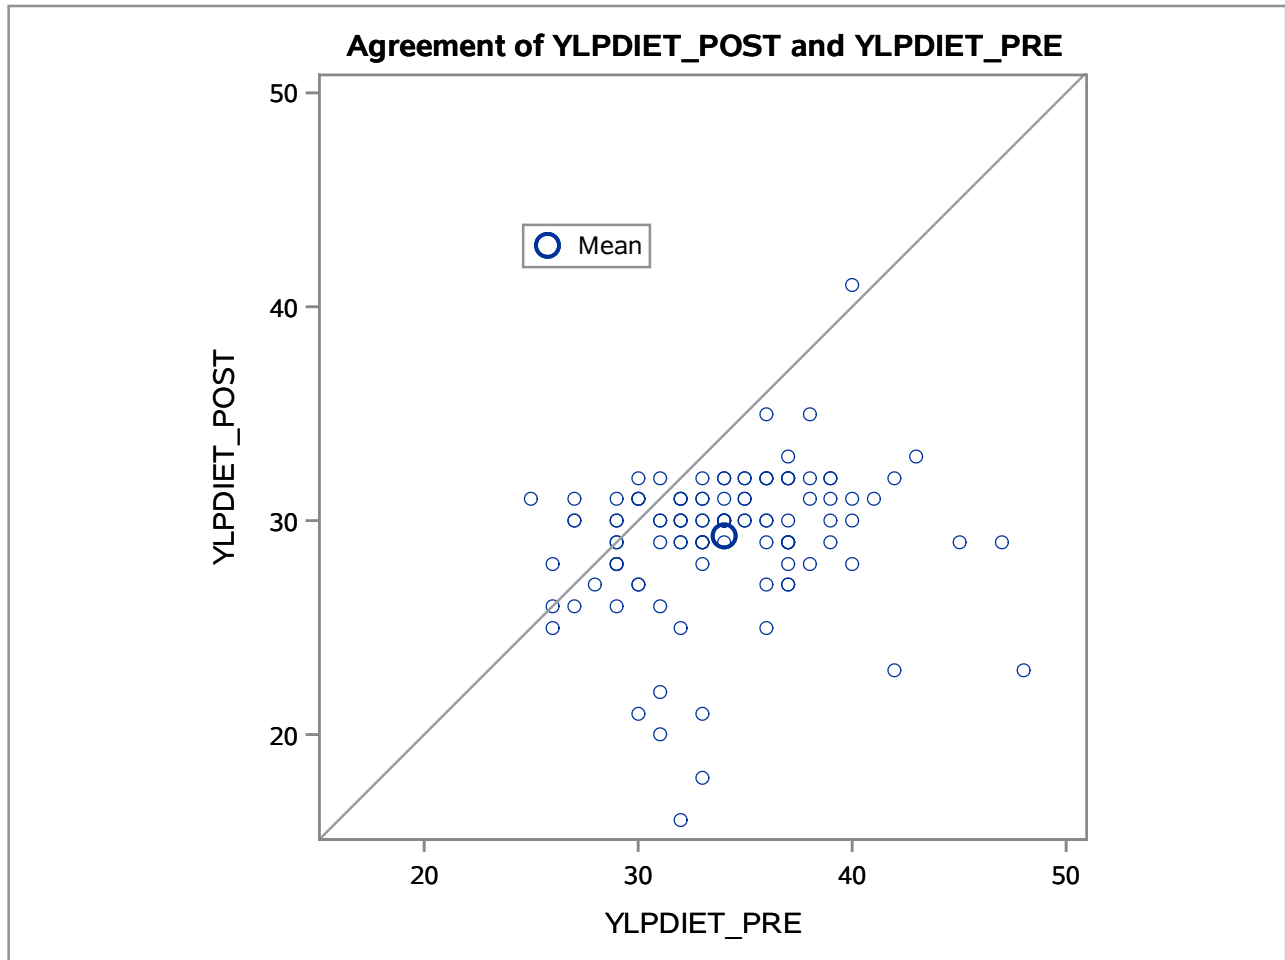

Difference: YLPDIET\_PRE - YLPDIET\_POST

Difference: YLPDIET\_PRE - YLPDIET\_POST

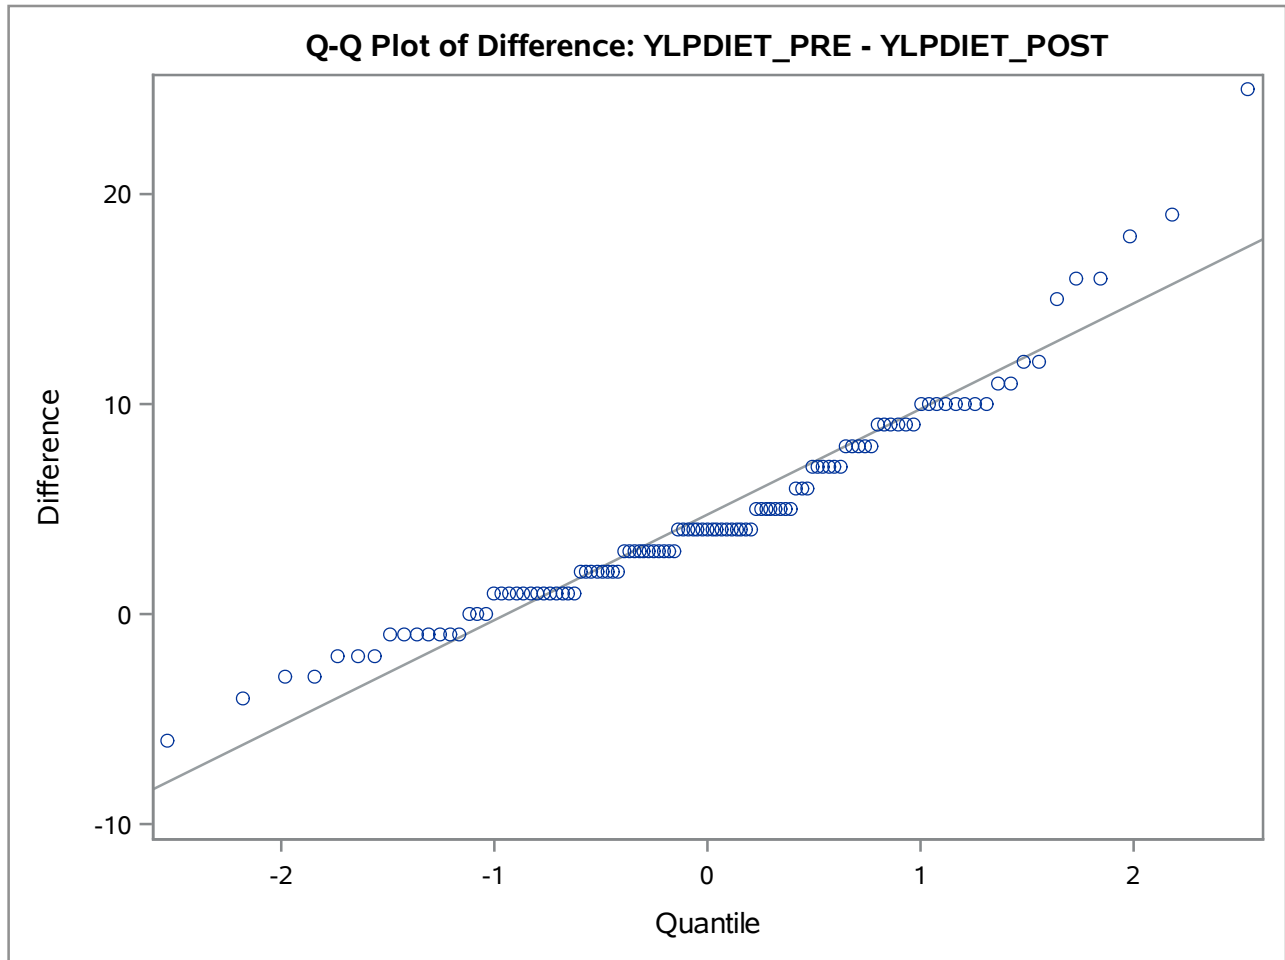

Variable: YLPPA\_Diff  
Group = 1

| Moments                |            |                         |            |
|------------------------|------------|-------------------------|------------|
| <b>N</b>               | 189        | <b>Sum Weights</b>      | 189        |
| <b>Mean</b>            | 1.40740741 | <b>Sum Observations</b> | 266        |
| <b>Std Deviation</b>   | 3.1737199  | <b>Variance</b>         | 10.072498  |
| <b>Skewness</b>        | 0.71839909 | <b>Kurtosis</b>         | 1.9385526  |
| <b>Uncorrected SS</b>  | 2268       | <b>Corrected SS</b>     | 1893.62963 |
| <b>Coeff Variation</b> | 225.501151 | <b>Std Error Mean</b>   | 0.23085415 |

| Basic Statistical Measures |          |                            |          |
|----------------------------|----------|----------------------------|----------|
| Location                   |          | Variability                |          |
| <b>Mean</b>                | 1.407407 | <b>Std Deviation</b>       | 3.17372  |
| <b>Median</b>              | 0.000000 | <b>Variance</b>            | 10.07250 |
| <b>Mode</b>                | 0.000000 | <b>Range</b>               | 21.00000 |
|                            |          | <b>Interquartile Range</b> | 3.00000  |

Variable: YLPPA\_Diff  
Group = 1

| Tests for Location: Mu0=0 |           |          |          |        |
|---------------------------|-----------|----------|----------|--------|
| Test                      | Statistic |          | p Value  |        |
| Student's t               | t         | 6.096522 | Pr >  t  | <.0001 |
| Sign                      | M         | 32       | Pr >=  M | <.0001 |
| Signed Rank               | S         | 2018     | Pr >=  S | <.0001 |

| Quantiles (Definition 5) |          |
|--------------------------|----------|
| Level                    | Quantile |
| 100% Max                 | 12       |
| 99%                      | 12       |
| 95%                      | 8        |
| 90%                      | 6        |
| 75% Q3                   | 3        |
| 50% Median               | 0        |
| 25% Q1                   | 0        |
| 10%                      | -1       |
| 5%                       | -3       |
| 1%                       | -7       |
| 0% Min                   | -9       |

| Extreme Observations |     |         |     |
|----------------------|-----|---------|-----|
| Lowest               |     | Highest |     |
| Value                | Obs | Value   | Obs |
| -9                   | 2   | 10      | 48  |
| -7                   | 155 | 10      | 70  |
| -6                   | 180 | 10      | 134 |
| -5                   | 87  | 12      | 117 |
| -5                   | 85  | 12      | 149 |

Variable: YLPPA\_Diff  
Group = 2

| Moments       |            |                  |            |
|---------------|------------|------------------|------------|
| N             | 111        | Sum Weights      | 111        |
| Mean          | 3.77477477 | Sum Observations | 419        |
| Std Deviation | 2.10490632 | Variance         | 4.43063063 |
| Skewness      | 0.9108472  | Kurtosis         | 2.72407399 |

Variable: YLPPA\_Diff  
Group = 2

| Moments         |            |                |            |
|-----------------|------------|----------------|------------|
| Uncorrected SS  | 2069       | Corrected SS   | 487.369369 |
| Coeff Variation | 55.7624348 | Std Error Mean | 0.19978887 |

| Basic Statistical Measures |          |                     |          |
|----------------------------|----------|---------------------|----------|
| Location                   |          | Variability         |          |
| Mean                       | 3.774775 | Std Deviation       | 2.10491  |
| Median                     | 4.000000 | Variance            | 4.43063  |
| Mode                       | 3.000000 | Range               | 14.00000 |
|                            |          | Interquartile Range | 3.00000  |

| Tests for Location: Mu0=0 |           |          |          |        |
|---------------------------|-----------|----------|----------|--------|
| Test                      | Statistic |          | p Value  |        |
| Student's t               | t         | 18.89382 | Pr >  t  | <.0001 |
| Sign                      | M         | 53       | Pr >=  M | <.0001 |
| Signed Rank               | S         | 2937.5   | Pr >=  S | <.0001 |

| Quantiles (Definition 5) |          |
|--------------------------|----------|
| Level                    | Quantile |
| 100% Max                 | 13       |
| 99%                      | 9        |
| 95%                      | 7        |
| 90%                      | 6        |
| 75% Q3                   | 5        |
| 50% Median               | 4        |
| 25% Q1                   | 2        |
| 10%                      | 1        |
| 5%                       | 1        |
| 1%                       | 0        |
| 0% Min                   | -1       |

Variable: YLPPA\_Diff  
Group = 2

| Extreme Observations |     |         |     |
|----------------------|-----|---------|-----|
| Lowest               |     | Highest |     |
| Value                | Obs | Value   | Obs |
| -1                   | 220 | 8       | 198 |
| 0                    | 300 | 8       | 288 |
| 0                    | 226 | 9       | 212 |
| 0                    | 201 | 9       | 231 |
| 1                    | 295 | 13      | 195 |

Variable: YLPAP\_Diff  
Group = 1

| Moments                |            |                         |            |
|------------------------|------------|-------------------------|------------|
| <b>N</b>               | 189        | <b>Sum Weights</b>      | 189        |
| <b>Mean</b>            | 1.70899471 | <b>Sum Observations</b> | 323        |
| <b>Std Deviation</b>   | 2.03558072 | <b>Variance</b>         | 4.14358888 |
| <b>Skewness</b>        | 0.65760396 | <b>Kurtosis</b>         | 1.05932527 |
| <b>Uncorrected SS</b>  | 1331       | <b>Corrected SS</b>     | 778.994709 |
| <b>Coeff Variation</b> | 119.109832 | <b>Std Error Mean</b>   | 0.14806671 |

| Basic Statistical Measures |          |                            |          |
|----------------------------|----------|----------------------------|----------|
| Location                   |          | Variability                |          |
| <b>Mean</b>                | 1.708995 | <b>Std Deviation</b>       | 2.03558  |
| <b>Median</b>              | 1.000000 | <b>Variance</b>            | 4.14359  |
| <b>Mode</b>                | 0.000000 | <b>Range</b>               | 13.00000 |
|                            |          | <b>Interquartile Range</b> | 3.00000  |

| Tests for Location: Mu0=0 |           |          |                     |        |
|---------------------------|-----------|----------|---------------------|--------|
| Test                      | Statistic |          | p Value             |        |
| <b>Student's t</b>        | t         | 11.54206 | <b>Pr &gt;  t </b>  | <.0001 |
| <b>Sign</b>               | M         | 58       | <b>Pr &gt;=  M </b> | <.0001 |
| <b>Signed Rank</b>        | S         | 4095.5   | <b>Pr &gt;=  S </b> | <.0001 |

Variable: YLPAP\_Diff  
Group = 1

| Quantiles (Definition 5) |          |
|--------------------------|----------|
| Level                    | Quantile |
| 100% Max                 | 8        |
| 99%                      | 8        |
| 95%                      | 5        |
| 90%                      | 4        |
| 75% Q3                   | 3        |
| 50% Median               | 1        |
| 25% Q1                   | 0        |
| 10%                      | 0        |
| 5%                       | 0        |
| 1%                       | -3       |
| 0% Min                   | -5       |

| Extreme Observations |     |         |     |
|----------------------|-----|---------|-----|
| Lowest               |     | Highest |     |
| Value                | Obs | Value   | Obs |
| -5                   | 2   | 7       | 23  |
| -3                   | 14  | 7       | 157 |
| -2                   | 97  | 8       | 34  |
| -2                   | 30  | 8       | 70  |
| -1                   | 185 | 8       | 71  |

Variable: YLPAP\_Diff  
Group = 2

| Moments                |            |                         |            |
|------------------------|------------|-------------------------|------------|
| <b>N</b>               | 111        | <b>Sum Weights</b>      | 111        |
| <b>Mean</b>            | 1.89189189 | <b>Sum Observations</b> | 210        |
| <b>Std Deviation</b>   | 2.05979413 | <b>Variance</b>         | 4.24275184 |
| <b>Skewness</b>        | 1.55881145 | <b>Kurtosis</b>         | 4.25919186 |
| <b>Uncorrected SS</b>  | 864        | <b>Corrected SS</b>     | 466.702703 |
| <b>Coeff Variation</b> | 108.874832 | <b>Std Error Mean</b>   | 0.19550701 |

Variable: YLPAP\_Diff  
Group = 2

| Basic Statistical Measures |          |                     |          |
|----------------------------|----------|---------------------|----------|
| Location                   |          | Variability         |          |
| Mean                       | 1.891892 | Std Deviation       | 2.05979  |
| Median                     | 1.000000 | Variance            | 4.24275  |
| Mode                       | 0.000000 | Range               | 13.00000 |
|                            |          | Interquartile Range | 3.00000  |

| Tests for Location: Mu0=0 |           |         |          |        |
|---------------------------|-----------|---------|----------|--------|
| Test                      | Statistic |         | p Value  |        |
| Student's t               | t         | 9.67685 | Pr >  t  | <.0001 |
| Sign                      | M         | 37.5    | Pr >=  M | <.0001 |
| Signed Rank               | S         | 1553    | Pr >=  S | <.0001 |

| Quantiles (Definition 5) |          |
|--------------------------|----------|
| Level                    | Quantile |
| 100% Max                 | 12       |
| 99%                      | 7        |
| 95%                      | 5        |
| 90%                      | 4        |
| 75% Q3                   | 3        |
| 50% Median               | 1        |
| 25% Q1                   | 0        |
| 10%                      | 0        |
| 5%                       | 0        |
| 1%                       | -1       |
| 0% Min                   | -1       |

| Extreme Observations |     |         |     |
|----------------------|-----|---------|-----|
| Lowest               |     | Highest |     |
| Value                | Obs | Value   | Obs |
| -1                   | 281 | 6       | 193 |
| -1                   | 269 | 6       | 235 |
| 0                    | 300 | 7       | 195 |
| 0                    | 299 | 7       | 230 |
| 0                    | 298 | 12      | 192 |



Variable: YLPDIET\_Diff  
Group = 1

| Moments                |            |                         |            |
|------------------------|------------|-------------------------|------------|
| <b>N</b>               | 189        | <b>Sum Weights</b>      | 189        |
| <b>Mean</b>            | 0.34391534 | <b>Sum Observations</b> | 65         |
| <b>Std Deviation</b>   | 4.57946707 | <b>Variance</b>         | 20.9715186 |
| <b>Skewness</b>        | 1.60262288 | <b>Kurtosis</b>         | 8.19798137 |
| <b>Uncorrected SS</b>  | 3965       | <b>Corrected SS</b>     | 3942.6455  |
| <b>Coeff Variation</b> | 1331.56812 | <b>Std Error Mean</b>   | 0.33310721 |

| Basic Statistical Measures |          |                            |          |
|----------------------------|----------|----------------------------|----------|
| Location                   |          | Variability                |          |
| <b>Mean</b>                | 0.343915 | <b>Std Deviation</b>       | 4.57947  |
| <b>Median</b>              | 0.000000 | <b>Variance</b>            | 20.97152 |
| <b>Mode</b>                | 0.000000 | <b>Range</b>               | 41.00000 |
|                            |          | <b>Interquartile Range</b> | 2.00000  |

| Tests for Location: Mu0=0 |           |          |                     |        |
|---------------------------|-----------|----------|---------------------|--------|
| Test                      | Statistic |          | p Value             |        |
| <b>Student's t</b>        | t         | 1.032446 | <b>Pr &gt;  t </b>  | 0.3032 |
| <b>Sign</b>               | M         | -4.5     | <b>Pr &gt;=  M </b> | 0.4394 |
| <b>Signed Rank</b>        | S         | 36.5     | <b>Pr &gt;=  S </b> | 0.9098 |

| Quantiles (Definition 5) |          |
|--------------------------|----------|
| Level                    | Quantile |
| <b>100% Max</b>          | 25       |
| <b>99%</b>               | 19       |
| <b>95%</b>               | 8        |
| <b>90%</b>               | 4        |
| <b>75% Q3</b>            | 1        |
| <b>50% Median</b>        | 0        |
| <b>25% Q1</b>            | -1       |
| <b>10%</b>               | -3       |
| <b>5%</b>                | -5       |
| <b>1%</b>                | -12      |
| <b>0% Min</b>            | -16      |

Variable: YLPDIET\_Diff  
Group = 1

| Extreme Observations |     |         |     |
|----------------------|-----|---------|-----|
| Lowest               |     | Highest |     |
| Value                | Obs | Value   | Obs |
| -16                  | 134 | 15      | 178 |
| -12                  | 180 | 16      | 149 |
| -12                  | 179 | 17      | 58  |
| -10                  | 87  | 19      | 34  |
| -7                   | 189 | 25      | 165 |

Variable: YLPDIET\_Diff  
Group = 2

| Moments                |            |                         |            |
|------------------------|------------|-------------------------|------------|
| <b>N</b>               | 111        | <b>Sum Weights</b>      | 111        |
| <b>Mean</b>            | 4.73873874 | <b>Sum Observations</b> | 526        |
| <b>Std Deviation</b>   | 5.02848561 | <b>Variance</b>         | 25.2856675 |
| <b>Skewness</b>        | 1.04271575 | <b>Kurtosis</b>         | 2.11536323 |
| <b>Uncorrected SS</b>  | 5274       | <b>Corrected SS</b>     | 2781.42342 |
| <b>Coeff Variation</b> | 106.11443  | <b>Std Error Mean</b>   | 0.47728273 |

| Basic Statistical Measures |          |                            |          |
|----------------------------|----------|----------------------------|----------|
| Location                   |          | Variability                |          |
| <b>Mean</b>                | 4.738739 | <b>Std Deviation</b>       | 5.02849  |
| <b>Median</b>              | 4.000000 | <b>Variance</b>            | 25.28567 |
| <b>Mode</b>                | 4.000000 | <b>Range</b>               | 31.00000 |
|                            |          | <b>Interquartile Range</b> | 7.00000  |

| Tests for Location: Mu0=0 |           |          |                     |        |
|---------------------------|-----------|----------|---------------------|--------|
| Test                      | Statistic |          | p Value             |        |
| <b>Student's t</b>        | t         | 9.928578 | <b>Pr &gt;  t </b>  | <.0001 |
| <b>Sign</b>               | M         | 40       | <b>Pr &gt;=  M </b> | <.0001 |
| <b>Signed Rank</b>        | S         | 2591     | <b>Pr &gt;=  S </b> | <.0001 |

Variable: YLPDIET\_Diff  
Group = 2

| Quantiles (Definition 5) |          |
|--------------------------|----------|
| Level                    | Quantile |
| 100% Max                 | 25       |
| 99%                      | 19       |
| 95%                      | 15       |
| 90%                      | 10       |
| 75% Q3                   | 8        |
| 50% Median               | 4        |
| 25% Q1                   | 1        |
| 10%                      | -1       |
| 5%                       | -2       |
| 1%                       | -4       |
| 0% Min                   | -6       |

| Extreme Observations |     |         |     |
|----------------------|-----|---------|-----|
| Lowest               |     | Highest |     |
| Value                | Obs | Value   | Obs |
| -6                   | 276 | 16      | 217 |
| -4                   | 274 | 16      | 235 |
| -3                   | 297 | 18      | 195 |
| -3                   | 267 | 19      | 225 |
| -2                   | 300 | 25      | 222 |

Variable: Age

| Group      | N   | Mean    | Std Dev | Std Err | Minimum | Maximum |
|------------|-----|---------|---------|---------|---------|---------|
| 1          | 189 | 61.4127 | 5.8043  | 0.4222  | 55.0000 | 78.0000 |
| 2          | 111 | 68.6306 | 7.8728  | 0.7473  | 54.0000 | 86.0000 |
| Diff (1-2) |     | -7.2179 | 6.6433  | 0.7944  |         |         |

| Group      | Method        | Mean    | 95% CL Mean |         | Std Dev | 95% CL Std Dev |        |
|------------|---------------|---------|-------------|---------|---------|----------------|--------|
| 1          |               | 61.4127 | 60.5798     | 62.2456 | 5.8043  | 5.2723         | 6.4568 |
| 2          |               | 68.6306 | 67.1498     | 70.1115 | 7.8728  | 6.9557         | 9.0705 |
| Diff (1-2) | Pooled        | -7.2179 | -8.7813     | -5.6545 | 6.6433  | 6.1501         | 7.2232 |
| Diff (1-2) | Satterthwaite | -7.2179 | -8.9115     | -5.5244 |         |                |        |

Variable: Age  
Group = 2

Variable: Age

| Method        | Variances | DF     | t Value | Pr >  t |
|---------------|-----------|--------|---------|---------|
| Pooled        | Equal     | 298    | -9.09   | <.0001  |
| Satterthwaite | Unequal   | 180.67 | -8.41   | <.0001  |

| Equality of Variances |        |        |         |        |
|-----------------------|--------|--------|---------|--------|
| Method                | Num DF | Den DF | F Value | Pr > F |
| Folded F              | 110    | 188    | 1.84    | 0.0002 |

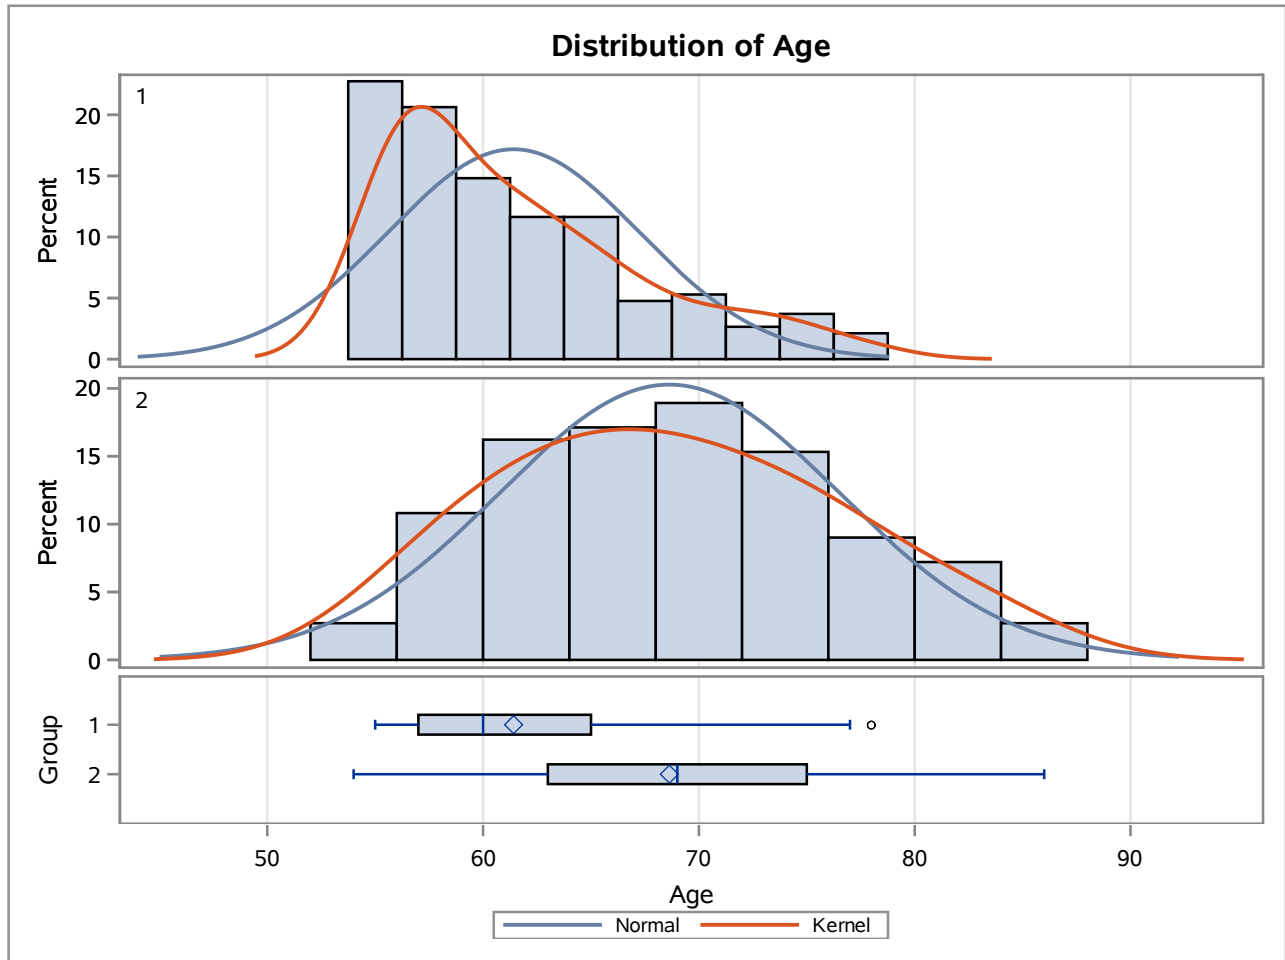

Variable: Age  
Group = 2

Variable: Age

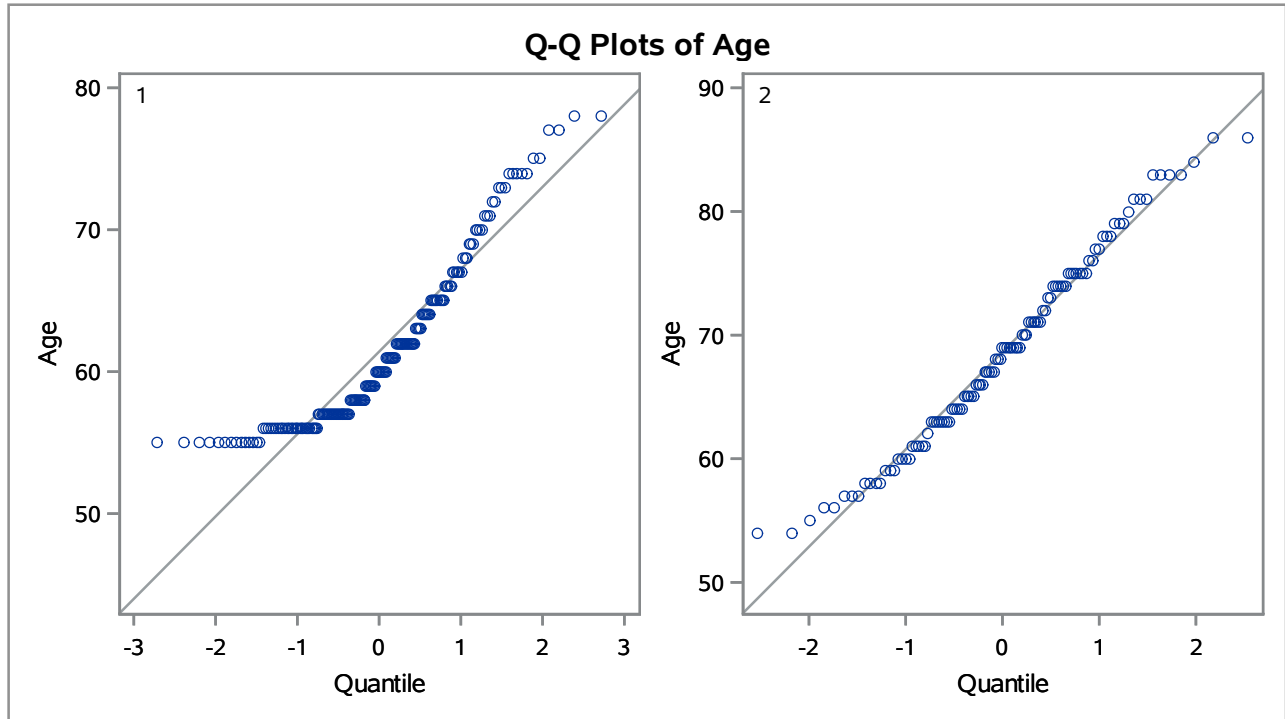

Variable: YLPPA\_Diff

| Group      | N   | Mean    | Std Dev | Std Err | Minimum | Maximum |
|------------|-----|---------|---------|---------|---------|---------|
| 1          | 189 | 1.4074  | 3.1737  | 0.2309  | -9.0000 | 12.0000 |
| 2          | 111 | 3.7748  | 2.1049  | 0.1998  | -1.0000 | 13.0000 |
| Diff (1-2) |     | -2.3674 | 2.8266  | 0.3380  |         |         |

| Group      | Method        | Mean    | 95% CL Mean |         | Std Dev | 95% CL Std Dev |        |
|------------|---------------|---------|-------------|---------|---------|----------------|--------|
| 1          |               | 1.4074  | 0.9520      | 1.8628  | 3.1737  | 2.8828         | 3.5305 |
| 2          |               | 3.7748  | 3.3788      | 4.1707  | 2.1049  | 1.8597         | 2.4251 |
| Diff (1-2) | Pooled        | -2.3674 | -3.0326     | -1.7022 | 2.8266  | 2.6168         | 3.0734 |
| Diff (1-2) | Satterthwaite | -2.3674 | -2.9682     | -1.7665 |         |                |        |

| Method        | Variances | DF    | t Value | Pr >  t |
|---------------|-----------|-------|---------|---------|
| Pooled        | Equal     | 298   | -7.00   | <.0001  |
| Satterthwaite | Unequal   | 293.6 | -7.75   | <.0001  |

| Equality of Variances |        |        |         |        |
|-----------------------|--------|--------|---------|--------|
| Method                | Num DF | Den DF | F Value | Pr > F |
| Folded F              | 188    | 110    | 2.27    | <.0001 |

Variable: YLPPA\_Diff  
Group = 2

Variable: YLPPA\_Diff

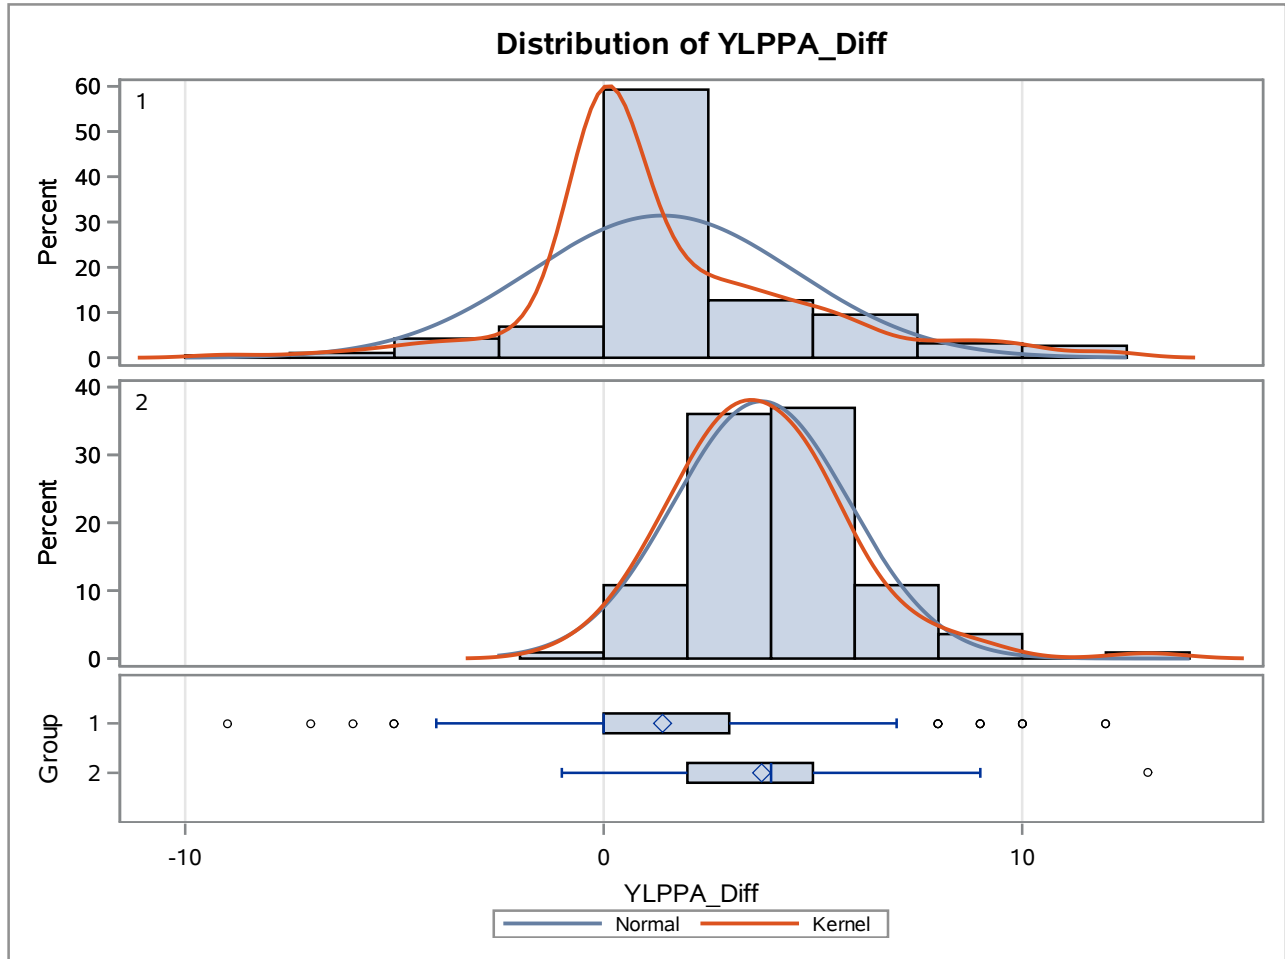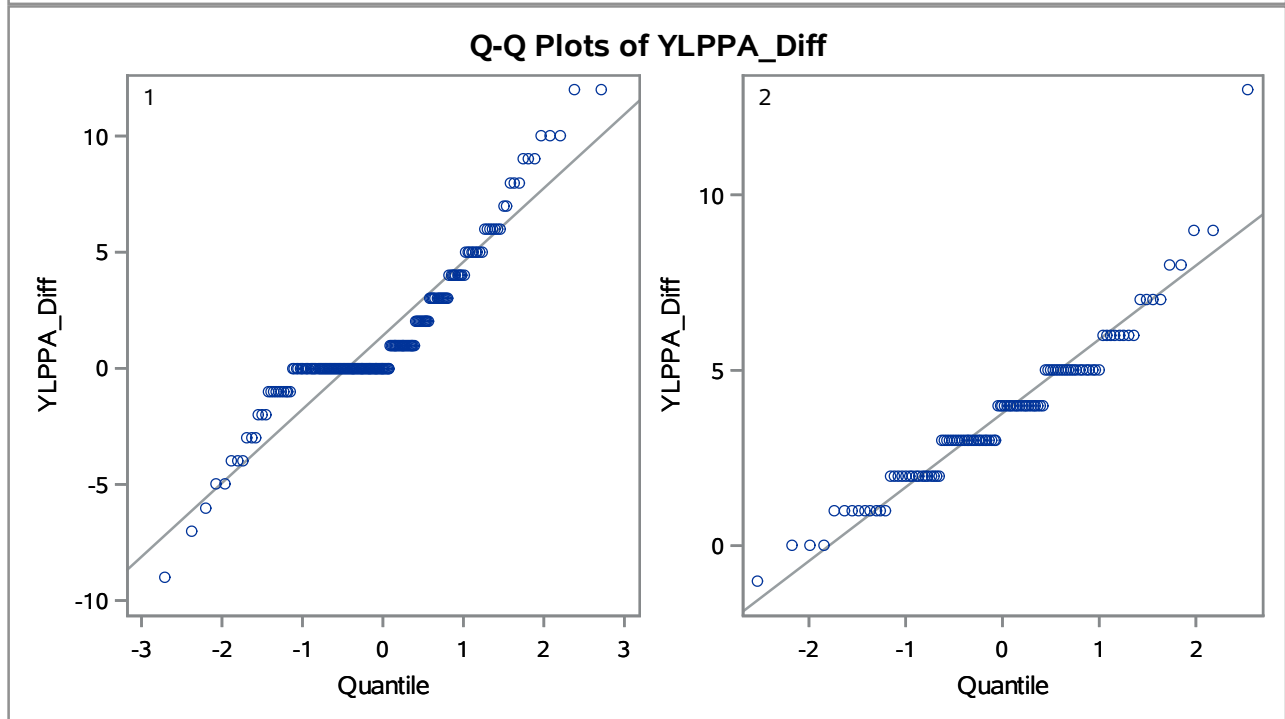

Variable: YLPAP\_Diff  
Group = 2

Variable: YLPAP\_Diff

Variable: YLPAP\_Diff

| Group      | N   | Mean    | Std Dev | Std Err | Minimum | Maximum |
|------------|-----|---------|---------|---------|---------|---------|
| 1          | 189 | 1.7090  | 2.0356  | 0.1481  | -5.0000 | 8.0000  |
| 2          | 111 | 1.8919  | 2.0598  | 0.1955  | -1.0000 | 12.0000 |
| Diff (1-2) |     | -0.1829 | 2.0446  | 0.2445  |         |         |

| Group      | Method        | Mean    | 95% CL Mean |        | Std Dev | 95% CL Std Dev |        |
|------------|---------------|---------|-------------|--------|---------|----------------|--------|
|            |               |         | Lower       | Upper  |         | Lower          | Upper  |
| 1          |               | 1.7090  | 1.4169      | 2.0011 | 2.0356  | 1.8490         | 2.2644 |
| 2          |               | 1.8919  | 1.5044      | 2.2793 | 2.0598  | 1.8199         | 2.3732 |
| Diff (1-2) | Pooled        | -0.1829 | -0.6640     | 0.2983 | 2.0446  | 1.8928         | 2.2230 |
| Diff (1-2) | Satterthwaite | -0.1829 | -0.6661     | 0.3003 |         |                |        |

| Method        | Variances | DF     | t Value | Pr >  t |
|---------------|-----------|--------|---------|---------|
| Pooled        | Equal     | 298    | -0.75   | 0.4550  |
| Satterthwaite | Unequal   | 228.41 | -0.75   | 0.4566  |

| Equality of Variances |        |        |         |        |
|-----------------------|--------|--------|---------|--------|
| Method                | Num DF | Den DF | F Value | Pr > F |
| Folded F              | 110    | 188    | 1.02    | 0.8776 |

Variable: YLPAP\_Diff  
Group = 2

Variable: YLPAP\_Diff

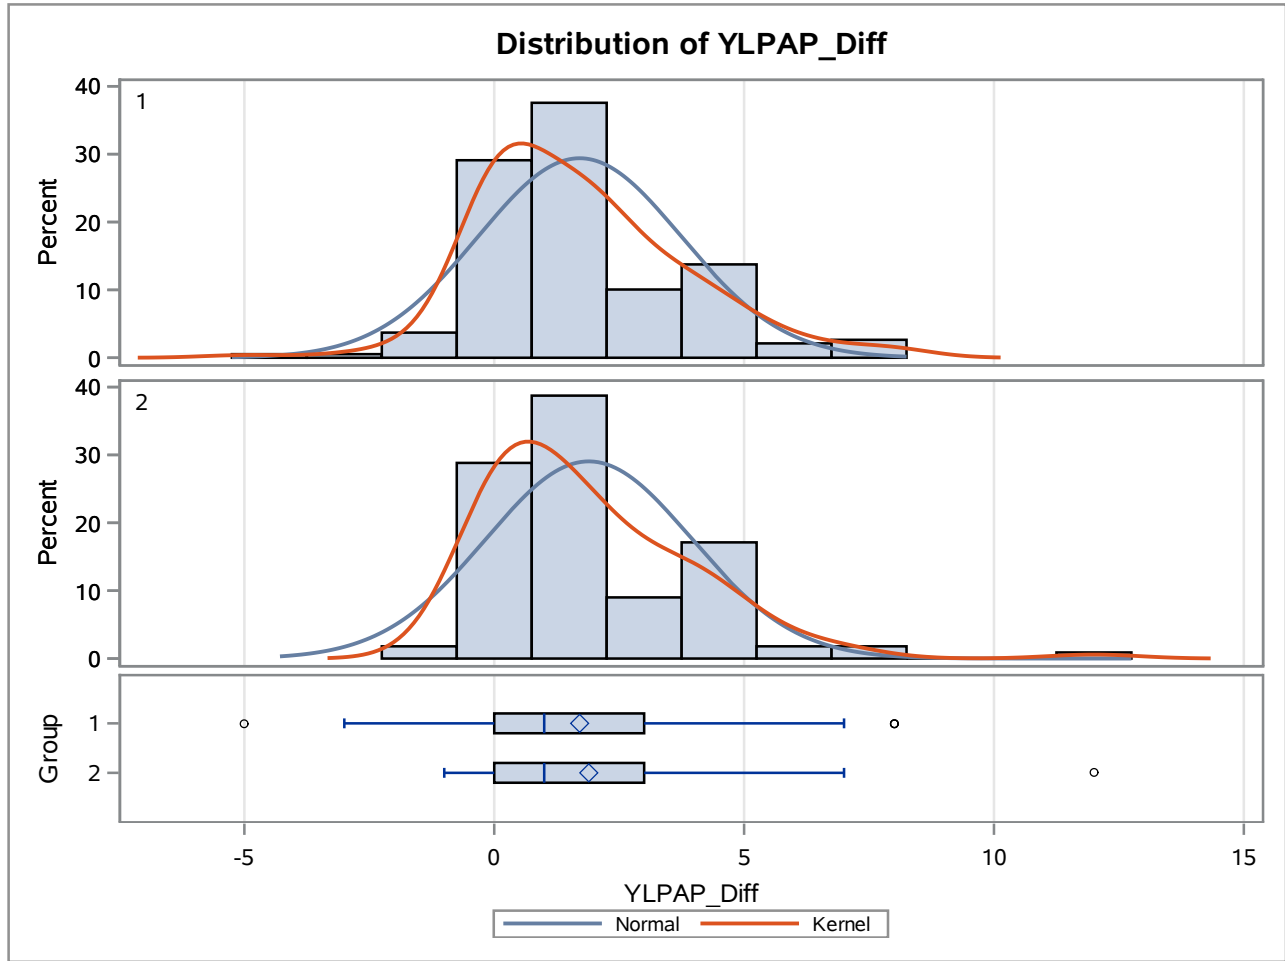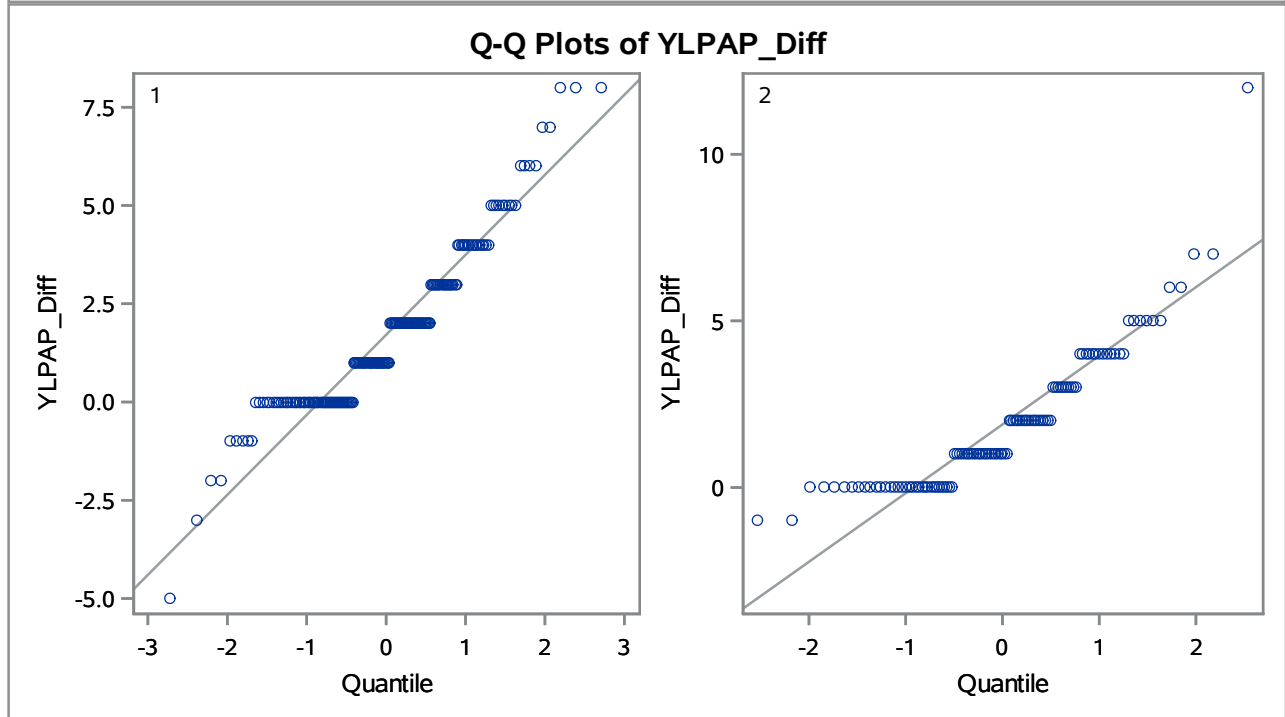



Variable: YLPDIET\_Diff  
Group = 2

Variable: YLPDIET\_Diff

Variable: YLPDIET\_Diff

| Group      | N   | Mean    | Std Dev | Std Err | Minimum  | Maximum |
|------------|-----|---------|---------|---------|----------|---------|
| 1          | 189 | 0.3439  | 4.5795  | 0.3331  | -16.0000 | 25.0000 |
| 2          | 111 | 4.7387  | 5.0285  | 0.4773  | -6.0000  | 25.0000 |
| Diff (1-2) |     | -4.3948 | 4.7502  | 0.5680  |          |         |

| Group      | Method        | Mean    | 95% CL Mean |         | Std Dev | 95% CL Std Dev |        |
|------------|---------------|---------|-------------|---------|---------|----------------|--------|
|            |               |         |             |         |         |                |        |
| 1          |               | 0.3439  | -0.3132     | 1.0010  | 4.5795  | 4.1597         | 5.0943 |
| 2          |               | 4.7387  | 3.7929      | 5.6846  | 5.0285  | 4.4428         | 5.7935 |
| Diff (1-2) | Pooled        | -4.3948 | -5.5127     | -3.2770 | 4.7502  | 4.3975         | 5.1648 |
| Diff (1-2) | Satterthwaite | -4.3948 | -5.5421     | -3.2476 |         |                |        |

| Method        | Variances | DF     | t Value | Pr >  t |
|---------------|-----------|--------|---------|---------|
| Pooled        | Equal     | 298    | -7.74   | <.0001  |
| Satterthwaite | Unequal   | 213.61 | -7.55   | <.0001  |

| Equality of Variances |        |        |         |        |
|-----------------------|--------|--------|---------|--------|
| Method                | Num DF | Den DF | F Value | Pr > F |
| Folded F              | 110    | 188    | 1.21    | 0.2614 |

Variable: YLPDIET\_Diff  
Group = 2

Variable: YLPDIET\_Diff

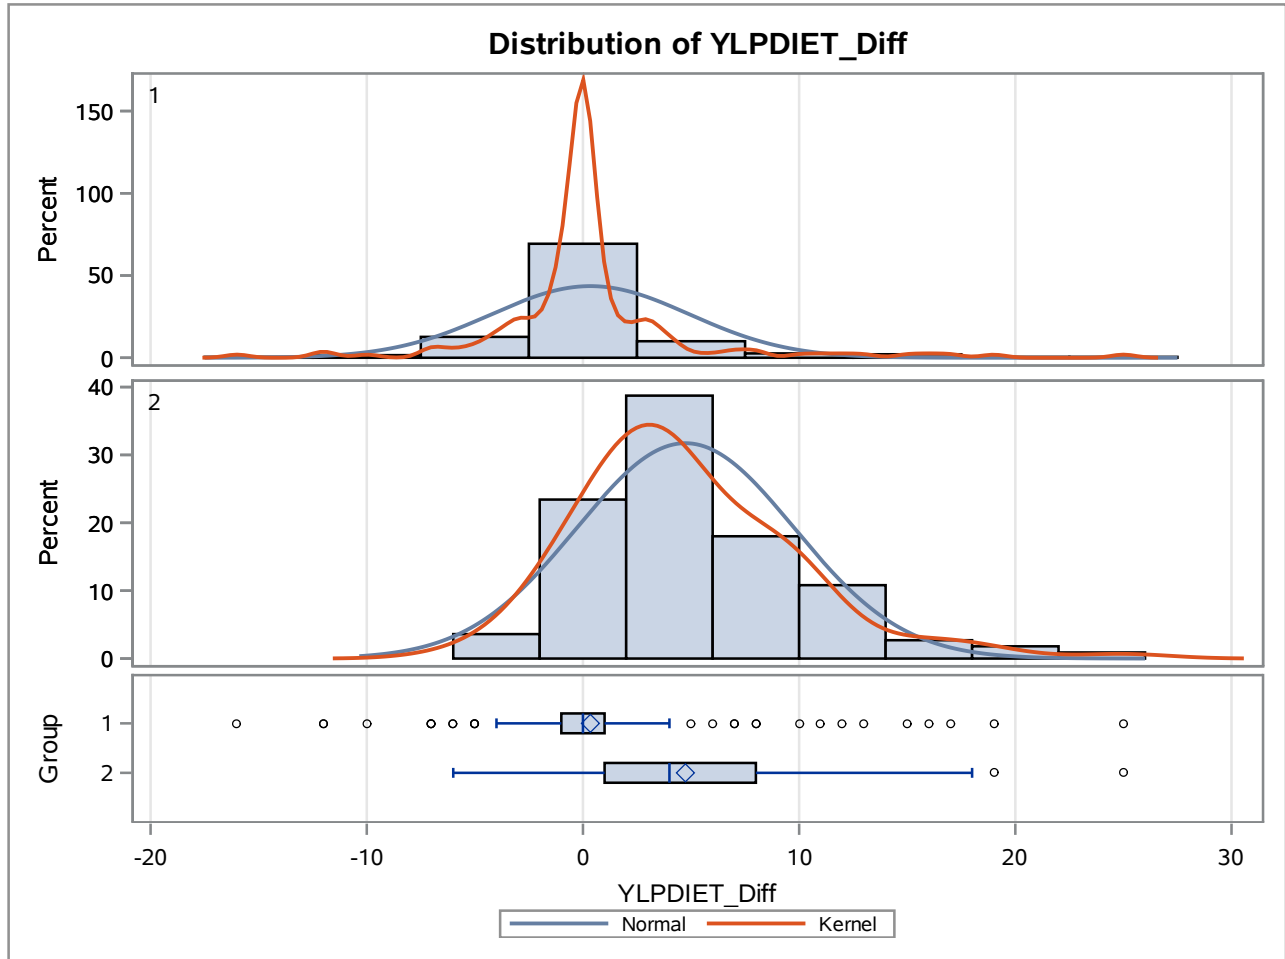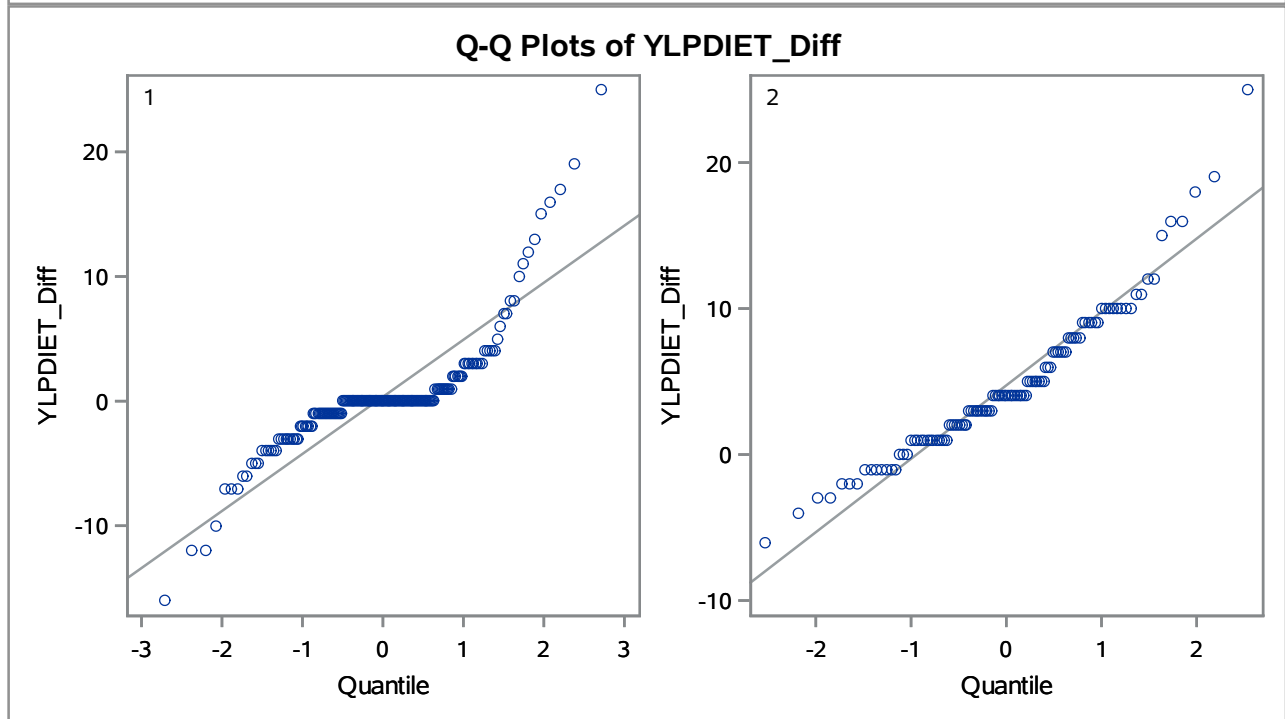

Variable: VASD  
Group = 2

Variable: VASD

Variable: VASD

| Group      | N   | Mean    | Std Dev | Std Err | Minimum | Maximum |
|------------|-----|---------|---------|---------|---------|---------|
| 1          | 189 | 4.3757  | 2.3883  | 0.1737  | 1.0000  | 10.0000 |
| 2          | 111 | 4.8739  | 2.1282  | 0.2020  | 0       | 10.0000 |
| Diff (1-2) |     | -0.4982 | 2.2957  | 0.2745  |         |         |

| Group      | Method        | Mean    | 95% CL Mean |        | Std Dev | 95% CL Std Dev |        |
|------------|---------------|---------|-------------|--------|---------|----------------|--------|
|            |               |         | Lower       | Upper  |         | Lower          | Upper  |
| 1          |               | 4.3757  | 4.0330      | 4.7184 | 2.3883  | 2.1693         | 2.6568 |
| 2          |               | 4.8739  | 4.4736      | 5.2742 | 2.1282  | 1.8803         | 2.4520 |
| Diff (1-2) | Pooled        | -0.4982 | -1.0385     | 0.0420 | 2.2957  | 2.1253         | 2.4961 |
| Diff (1-2) | Satterthwaite | -0.4982 | -1.0229     | 0.0265 |         |                |        |

| Method        | Variances | DF     | t Value | Pr >  t |
|---------------|-----------|--------|---------|---------|
| Pooled        | Equal     | 298    | -1.81   | 0.0706  |
| Satterthwaite | Unequal   | 252.17 | -1.87   | 0.0626  |

| Equality of Variances |        |        |         |        |
|-----------------------|--------|--------|---------|--------|
| Method                | Num DF | Den DF | F Value | Pr > F |
| Folded F              | 188    | 110    | 1.26    | 0.1848 |

Variable: VASD  
Group = 2

Variable: VASD

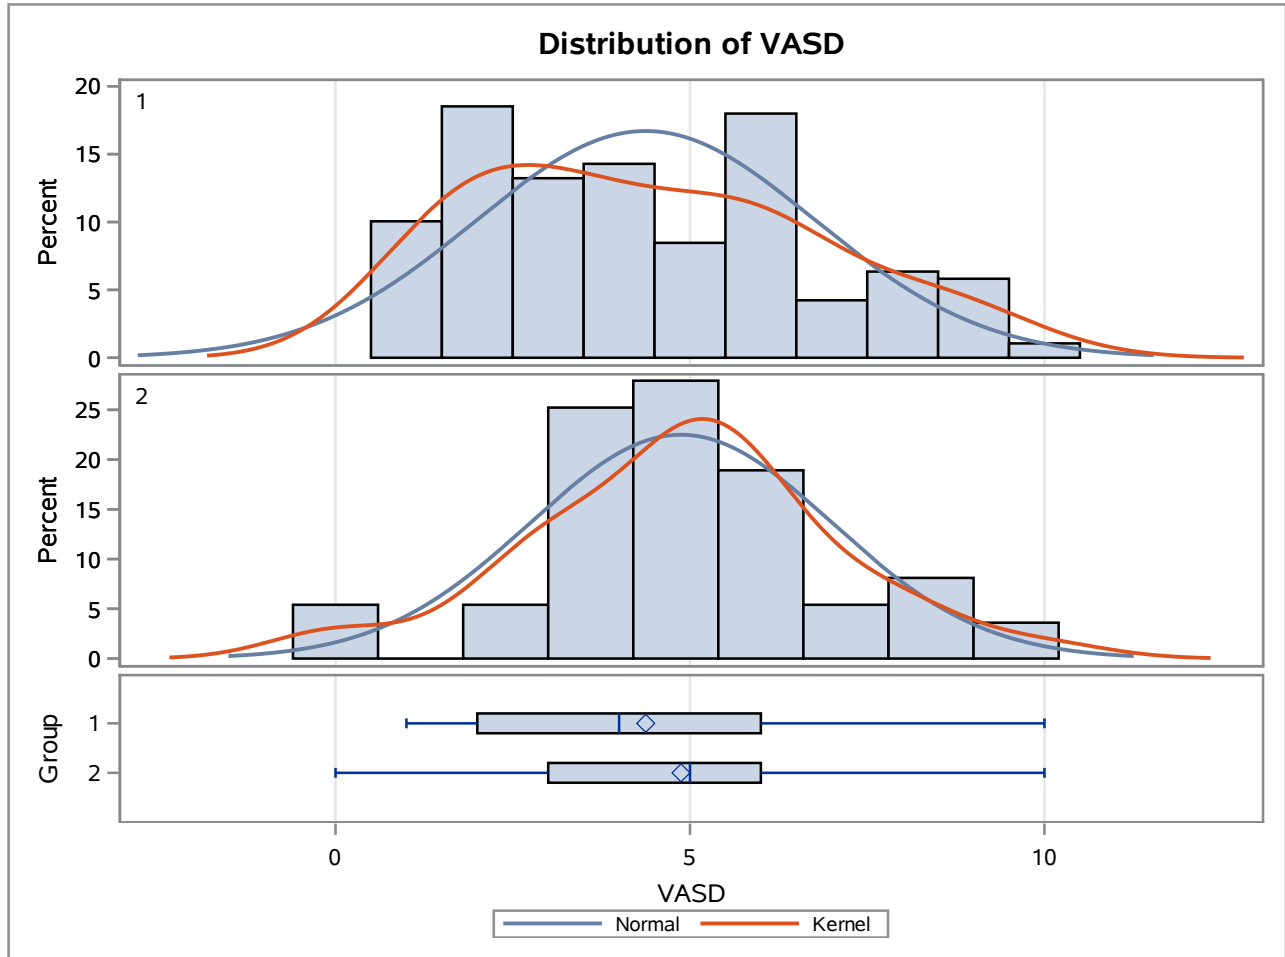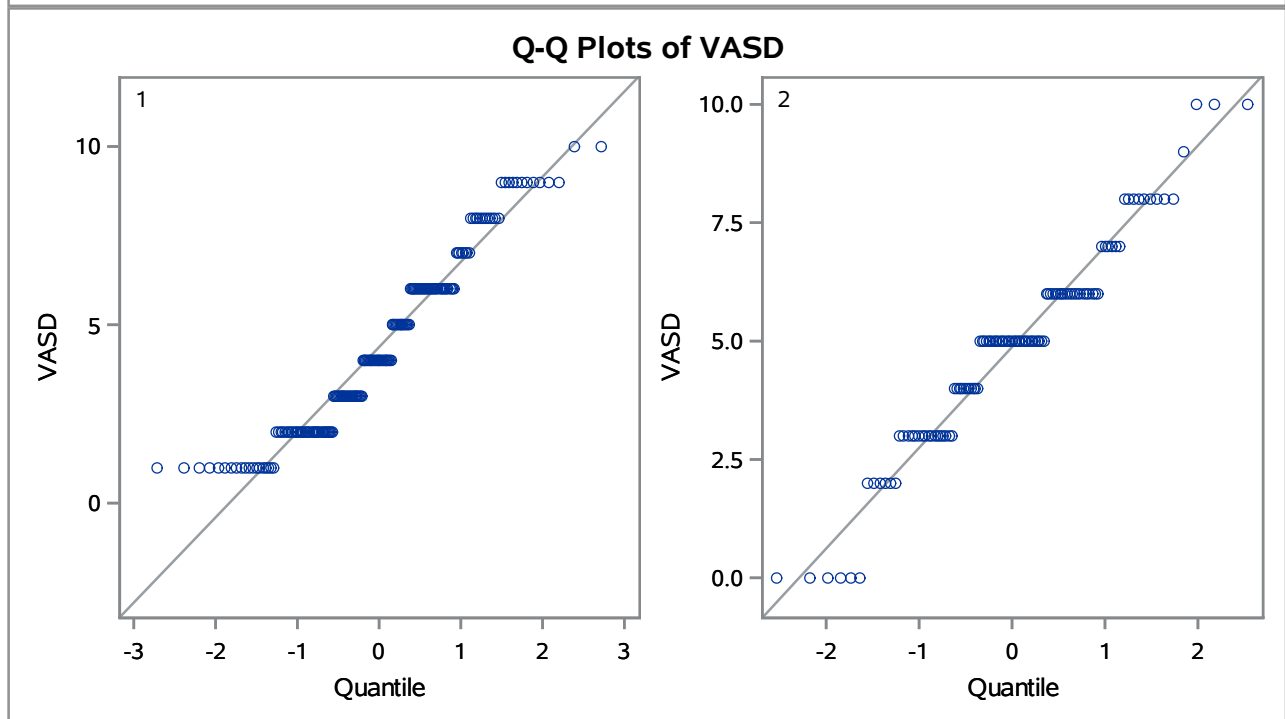

Variable: PHQ  
Group = 2

Variable: PHQ

Variable: PHQ

| Group      | N   | Mean    | Std Dev | Std Err | Minimum | Maximum |
|------------|-----|---------|---------|---------|---------|---------|
| 1          | 189 | 4.1376  | 4.0975  | 0.2980  | 0       | 20.0000 |
| 2          | 111 | 5.1081  | 4.0031  | 0.3800  | 0       | 19.0000 |
| Diff (1-2) |     | -0.9705 | 4.0629  | 0.4859  |         |         |

| Group      | Method        | Mean    | 95% CL Mean |         | Std Dev | 95% CL Std Dev |        |
|------------|---------------|---------|-------------|---------|---------|----------------|--------|
|            |               |         |             |         |         |                |        |
| 1          |               | 4.1376  | 3.5496      | 4.7255  | 4.0975  | 3.7219         | 4.5581 |
| 2          |               | 5.1081  | 4.3551      | 5.8611  | 4.0031  | 3.5368         | 4.6121 |
| Diff (1-2) | Pooled        | -0.9705 | -1.9267     | -0.0144 | 4.0629  | 3.7613         | 4.4175 |
| Diff (1-2) | Satterthwaite | -0.9705 | -1.9219     | -0.0192 |         |                |        |

| Method        | Variances | DF     | t Value | Pr >  t |
|---------------|-----------|--------|---------|---------|
| Pooled        | Equal     | 298    | -2.00   | 0.0467  |
| Satterthwaite | Unequal   | 234.97 | -2.01   | 0.0456  |

| Equality of Variances |        |        |         |        |
|-----------------------|--------|--------|---------|--------|
| Method                | Num DF | Den DF | F Value | Pr > F |
| Folded F              | 188    | 110    | 1.05    | 0.7958 |

Variable: PHQ  
Group = 2

Variable: PHQ

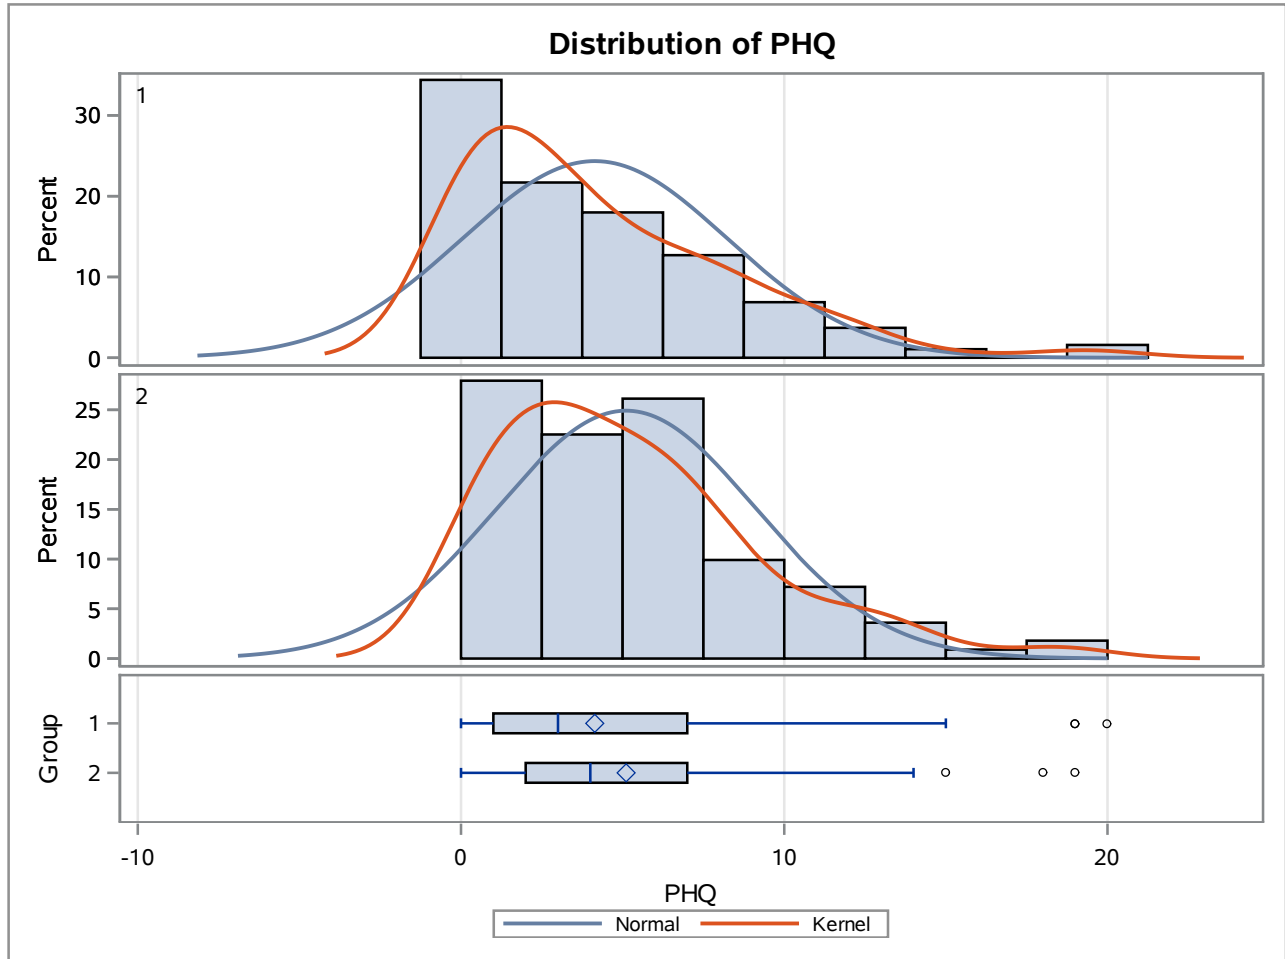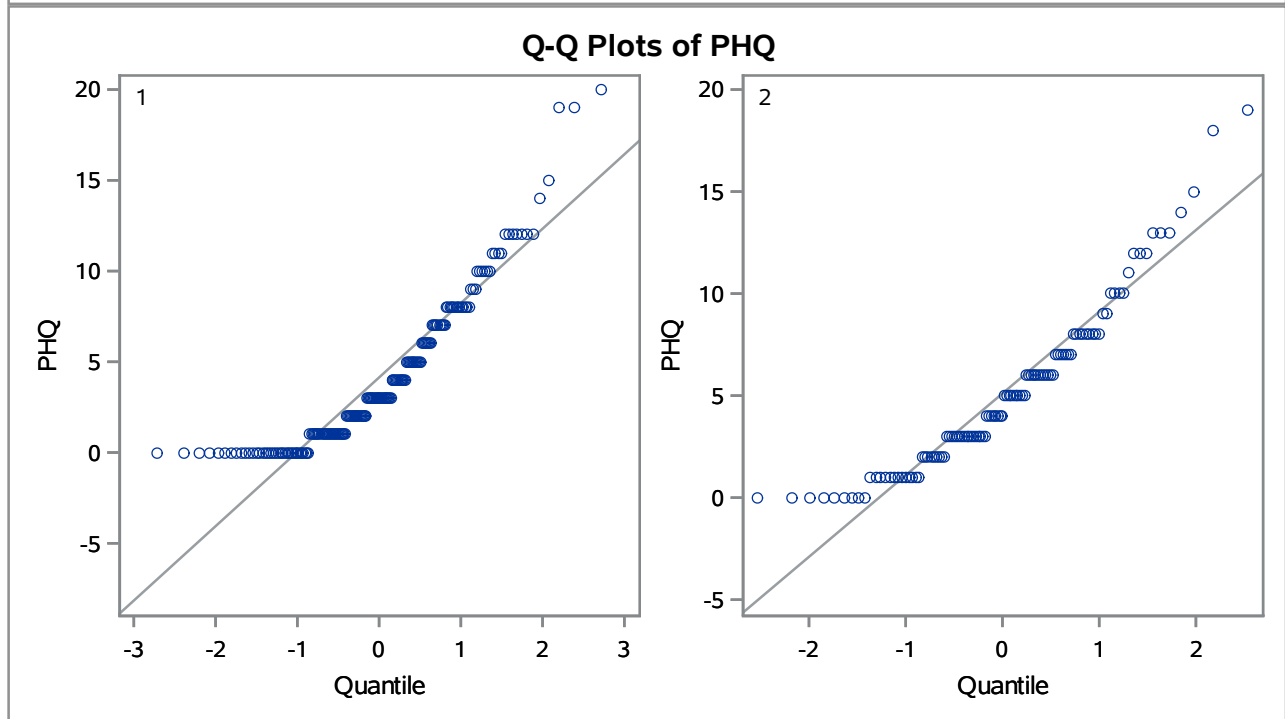

Variable: VASA  
Group = 2

Variable: VASA

Variable: VASA

| Group      | N   | Mean    | Std Dev | Std Err | Minimum | Maximum |
|------------|-----|---------|---------|---------|---------|---------|
| 1          | 189 | 5.2063  | 2.0277  | 0.1475  | 1.0000  | 9.0000  |
| 2          | 111 | 5.2973  | 2.6236  | 0.2490  | 0       | 10.0000 |
| Diff (1-2) |     | -0.0909 | 2.2660  | 0.2710  |         |         |

| Group      | Method        | Mean    | 95% CL Mean |        | Std Dev | 95% CL Std Dev |        |
|------------|---------------|---------|-------------|--------|---------|----------------|--------|
|            |               |         | Lower       | Upper  |         | Lower          | Upper  |
| 1          |               | 5.2063  | 4.9154      | 5.4973 | 2.0277  | 1.8418         | 2.2556 |
| 2          |               | 5.2973  | 4.8038      | 5.7908 | 2.6236  | 2.3180         | 3.0228 |
| Diff (1-2) | Pooled        | -0.0909 | -0.6242     | 0.4423 | 2.2660  | 2.0978         | 2.4638 |
| Diff (1-2) | Satterthwaite | -0.0909 | -0.6619     | 0.4800 |         |                |        |

| Method        | Variances | DF     | t Value | Pr >  t |
|---------------|-----------|--------|---------|---------|
| Pooled        | Equal     | 298    | -0.34   | 0.7374  |
| Satterthwaite | Unequal   | 187.23 | -0.31   | 0.7537  |

| Equality of Variances |        |        |         |        |
|-----------------------|--------|--------|---------|--------|
| Method                | Num DF | Den DF | F Value | Pr > F |
| Folded F              | 110    | 188    | 1.67    | 0.0019 |

Variable: VASA  
Group = 2

Variable: VASA

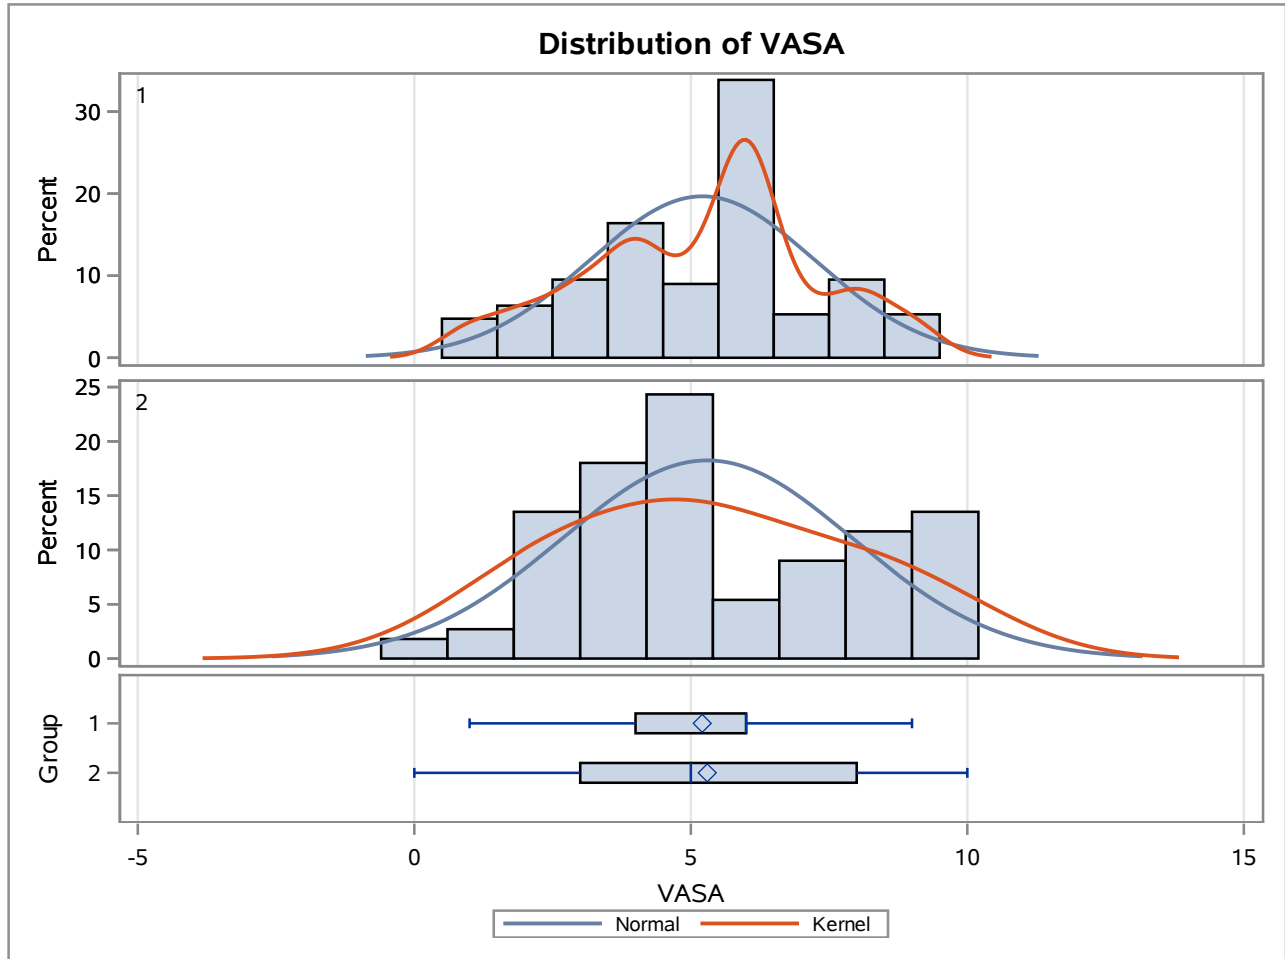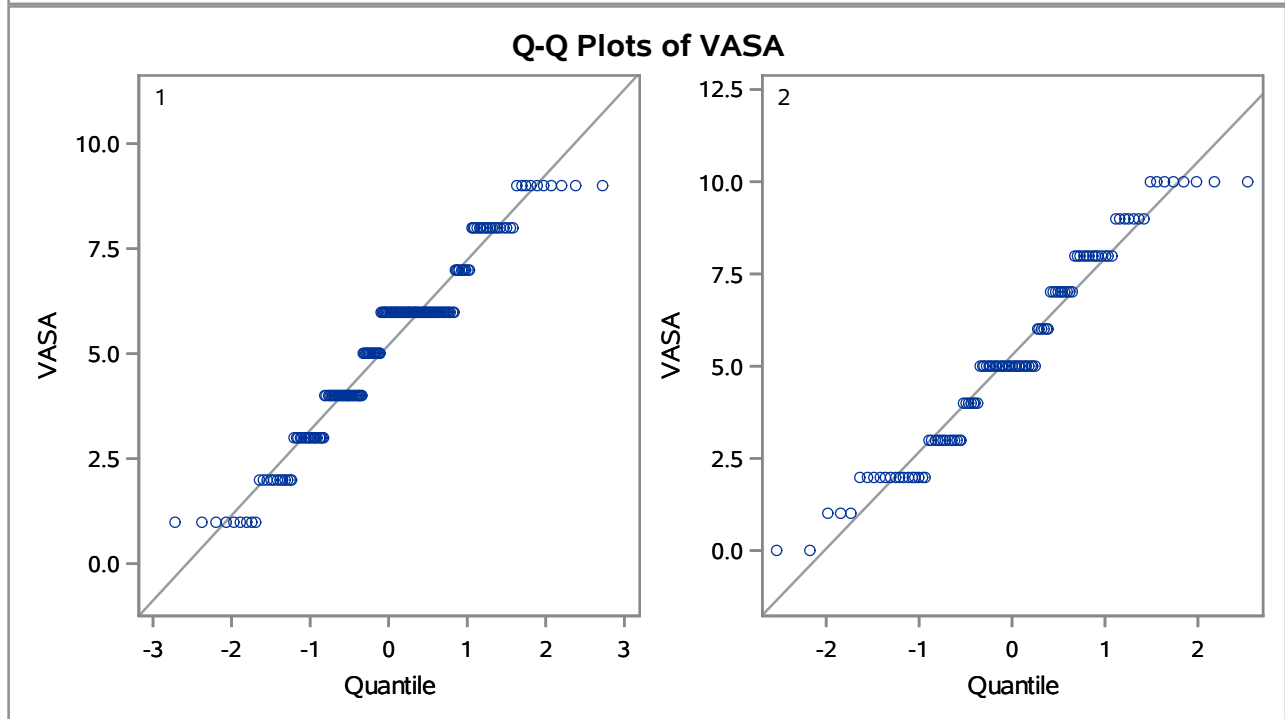



Variable: SAS  
Group = 2

Variable: SAS

Variable: SAS

| Group      | N   | Mean    | Std Dev | Std Err | Minimum | Maximum |
|------------|-----|---------|---------|---------|---------|---------|
| 1          | 189 | 36.2328 | 7.3375  | 0.5337  | 23.0000 | 70.0000 |
| 2          | 111 | 37.0541 | 7.3631  | 0.6989  | 21.0000 | 56.0000 |
| Diff (1-2) |     | -0.8212 | 7.3470  | 0.8786  |         |         |

| Group      | Method        | Mean    | 95% CL Mean |         | Std Dev | 95% CL Std Dev |        |
|------------|---------------|---------|-------------|---------|---------|----------------|--------|
|            |               |         | Lower       | Upper   |         | Lower          | Upper  |
| 1          |               | 36.2328 | 35.1799     | 37.2857 | 7.3375  | 6.6649         | 8.1624 |
| 2          |               | 37.0541 | 35.6690     | 38.4391 | 7.3631  | 6.5054         | 8.4833 |
| Diff (1-2) | Pooled        | -0.8212 | -2.5502     | 0.9077  | 7.3470  | 6.8015         | 7.9883 |
| Diff (1-2) | Satterthwaite | -0.8212 | -2.5539     | 0.9114  |         |                |        |

| Method        | Variances | DF     | t Value | Pr >  t |
|---------------|-----------|--------|---------|---------|
| Pooled        | Equal     | 298    | -0.93   | 0.3507  |
| Satterthwaite | Unequal   | 229.96 | -0.93   | 0.3513  |

| Equality of Variances |        |        |         |        |
|-----------------------|--------|--------|---------|--------|
| Method                | Num DF | Den DF | F Value | Pr > F |
| Folded F              | 110    | 188    | 1.01    | 0.9555 |

Variable: SAS  
Group = 2

Variable: SAS

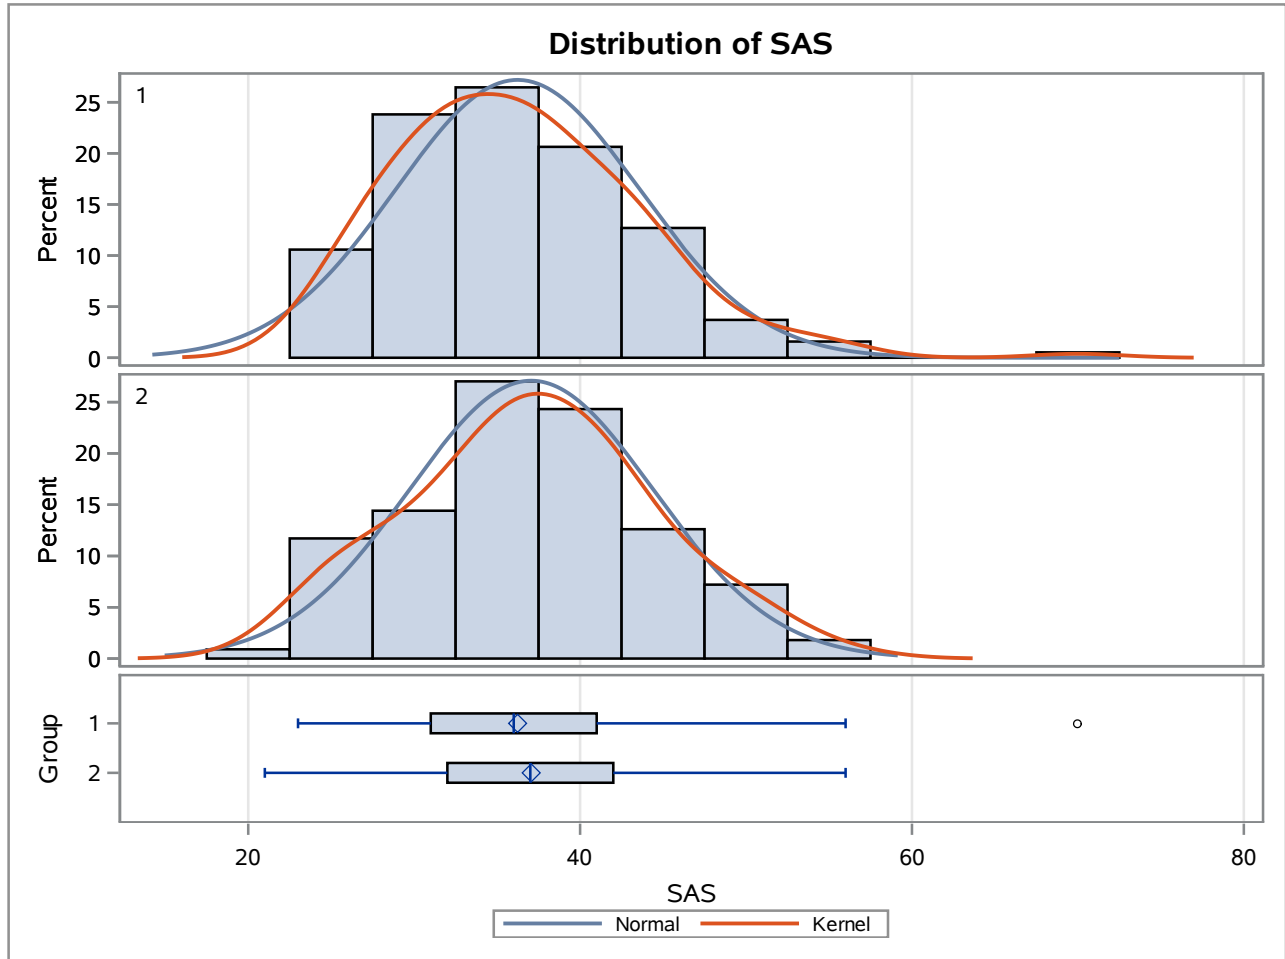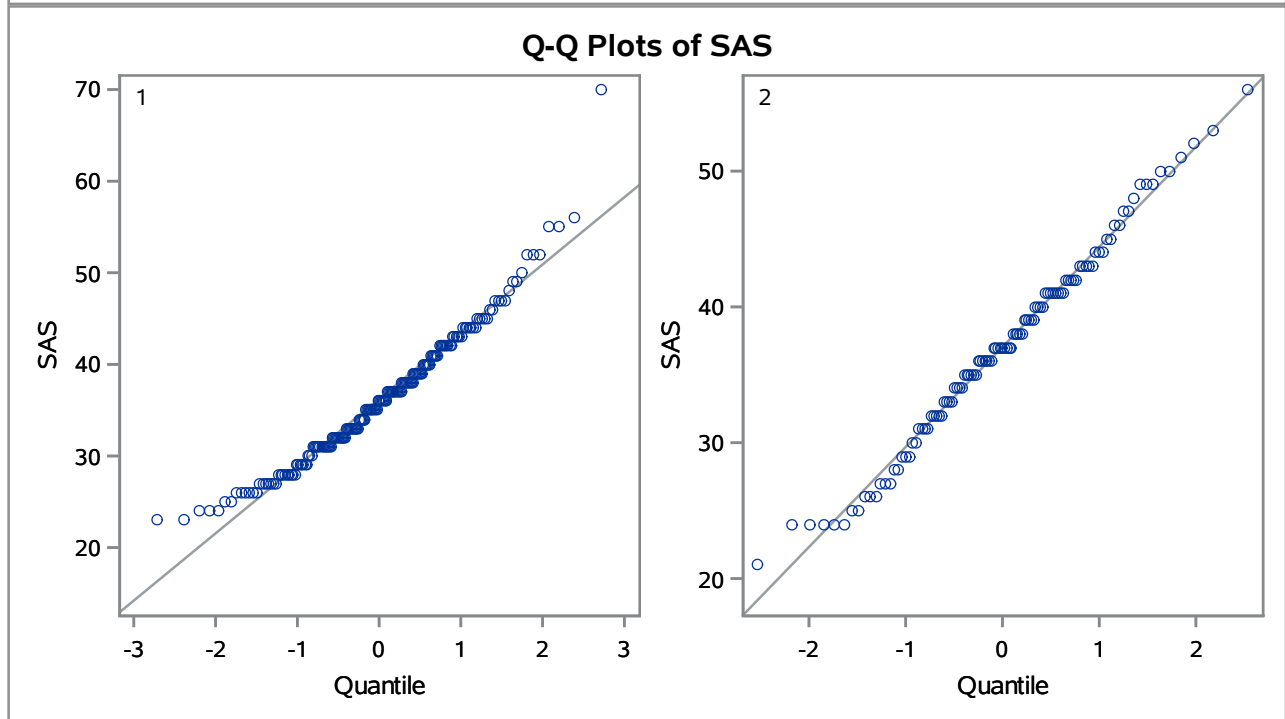

Variable: ISI  
Group = 2

Variable: ISI

Variable: ISI

| Group      | N   | Mean    | Std Dev | Std Err | Minimum | Maximum |
|------------|-----|---------|---------|---------|---------|---------|
| 1          | 189 | 8.5767  | 6.2544  | 0.4549  | 0       | 28.0000 |
| 2          | 111 | 10.7027 | 5.2007  | 0.4936  | 2.0000  | 28.0000 |
| Diff (1-2) |     | -2.1260 | 5.8875  | 0.7040  |         |         |

| Group      | Method        | Mean    | 95% CL Mean |         | Std Dev | 95% CL Std Dev |        |
|------------|---------------|---------|-------------|---------|---------|----------------|--------|
|            |               |         |             |         |         |                |        |
| 1          |               | 8.5767  | 7.6793      | 9.4742  | 6.2544  | 5.6811         | 6.9575 |
| 2          |               | 10.7027 | 9.7244      | 11.6810 | 5.2007  | 4.5949         | 5.9919 |
| Diff (1-2) | Pooled        | -2.1260 | -3.5115     | -0.7405 | 5.8875  | 5.4504         | 6.4014 |
| Diff (1-2) | Satterthwaite | -2.1260 | -3.4477     | -0.8042 |         |                |        |

| Method        | Variances | DF     | t Value | Pr >  t |
|---------------|-----------|--------|---------|---------|
| Pooled        | Equal     | 298    | -3.02   | 0.0027  |
| Satterthwaite | Unequal   | 264.55 | -3.17   | 0.0017  |

| Equality of Variances |        |        |         |        |
|-----------------------|--------|--------|---------|--------|
| Method                | Num DF | Den DF | F Value | Pr > F |
| Folded F              | 188    | 110    | 1.45    | 0.0344 |

Variable: ISI  
Group = 2

Variable: ISI

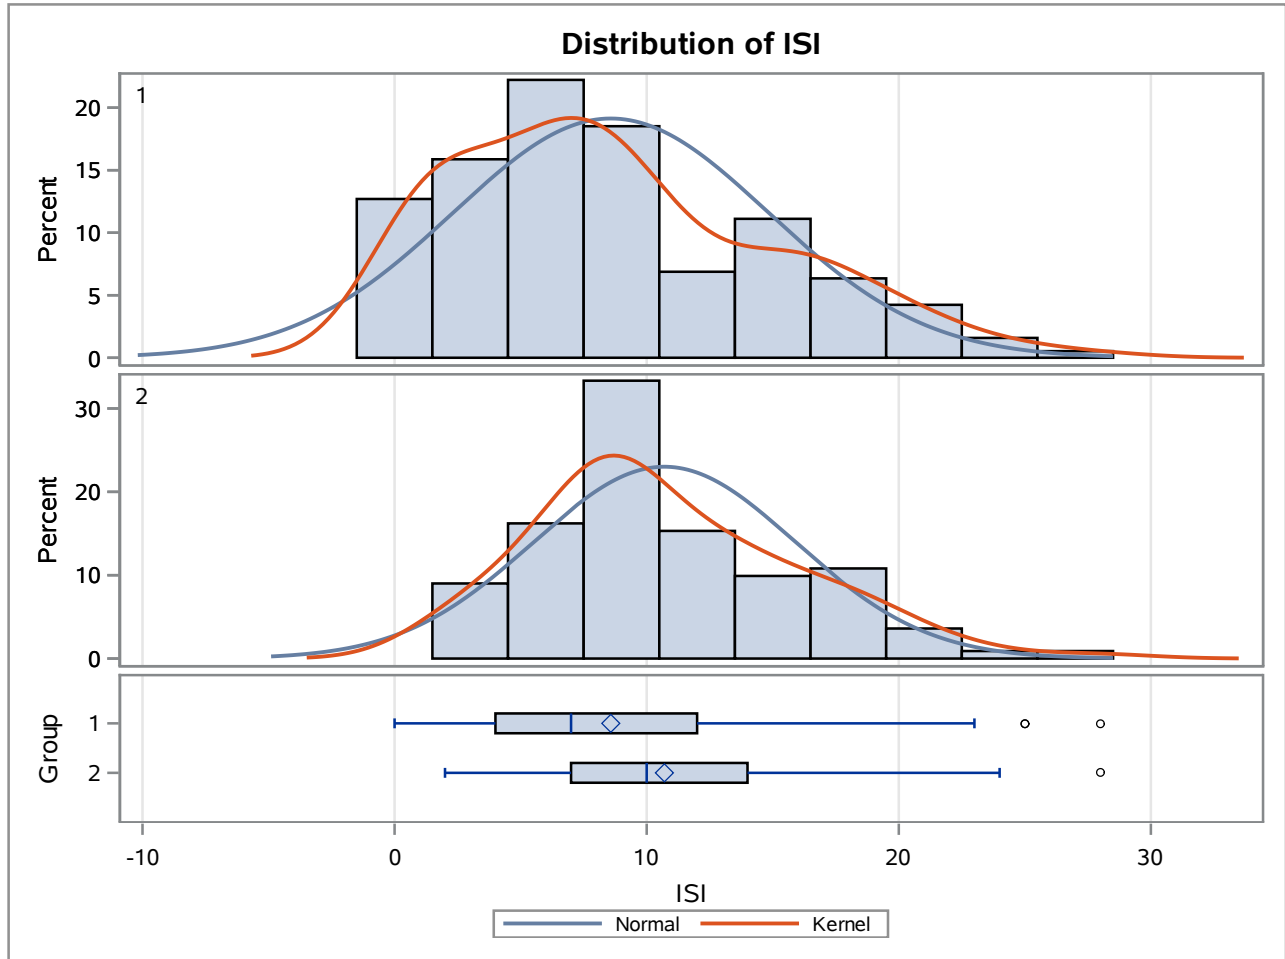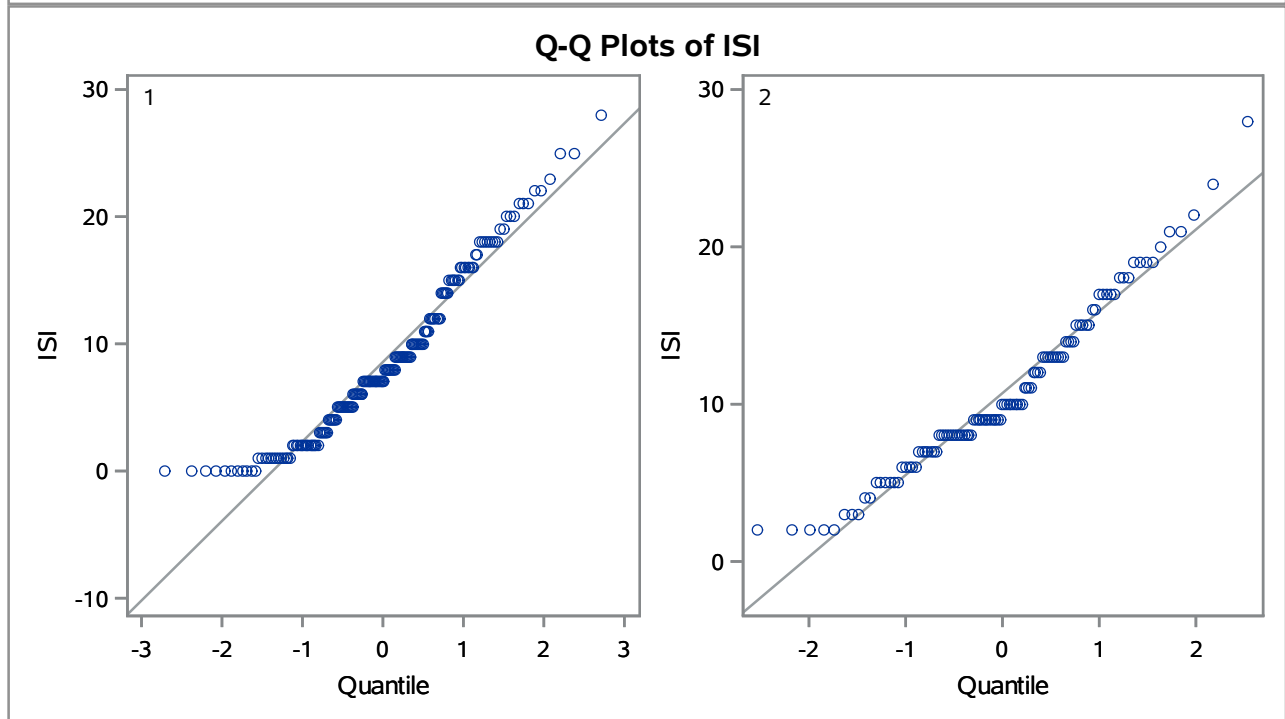

Variable: FCV  
Group = 2

Variable: FCV

Variable: FCV

| Group      | N   | Mean    | Std Dev | Std Err | Minimum | Maximum |
|------------|-----|---------|---------|---------|---------|---------|
| 1          | 189 | 17.4815 | 5.9444  | 0.4324  | 7.0000  | 34.0000 |
| 2          | 111 | 17.4324 | 5.3557  | 0.5083  | 7.0000  | 35.0000 |
| Diff (1-2) |     | 0.0490  | 5.7342  | 0.6857  |         |         |

| Group      | Method        | Mean    | 95% CL Mean |         | Std Dev | 95% CL Std Dev |        |
|------------|---------------|---------|-------------|---------|---------|----------------|--------|
|            |               |         |             |         |         |                |        |
| 1          |               | 17.4815 | 16.6285     | 18.3344 | 5.9444  | 5.3995         | 6.6127 |
| 2          |               | 17.4324 | 16.4250     | 18.4399 | 5.3557  | 4.7319         | 6.1706 |
| Diff (1-2) | Pooled        | 0.0490  | -1.3004     | 1.3985  | 5.7342  | 5.3084         | 6.2347 |
| Diff (1-2) | Satterthwaite | 0.0490  | -1.2653     | 1.3634  |         |                |        |

| Method        | Variances | DF     | t Value | Pr >  t |
|---------------|-----------|--------|---------|---------|
| Pooled        | Equal     | 298    | 0.07    | 0.9430  |
| Satterthwaite | Unequal   | 250.14 | 0.07    | 0.9415  |

| Equality of Variances |        |        |         |        |
|-----------------------|--------|--------|---------|--------|
| Method                | Num DF | Den DF | F Value | Pr > F |
| Folded F              | 188    | 110    | 1.23    | 0.2303 |

Variable: FCV  
Group = 2

Variable: FCV

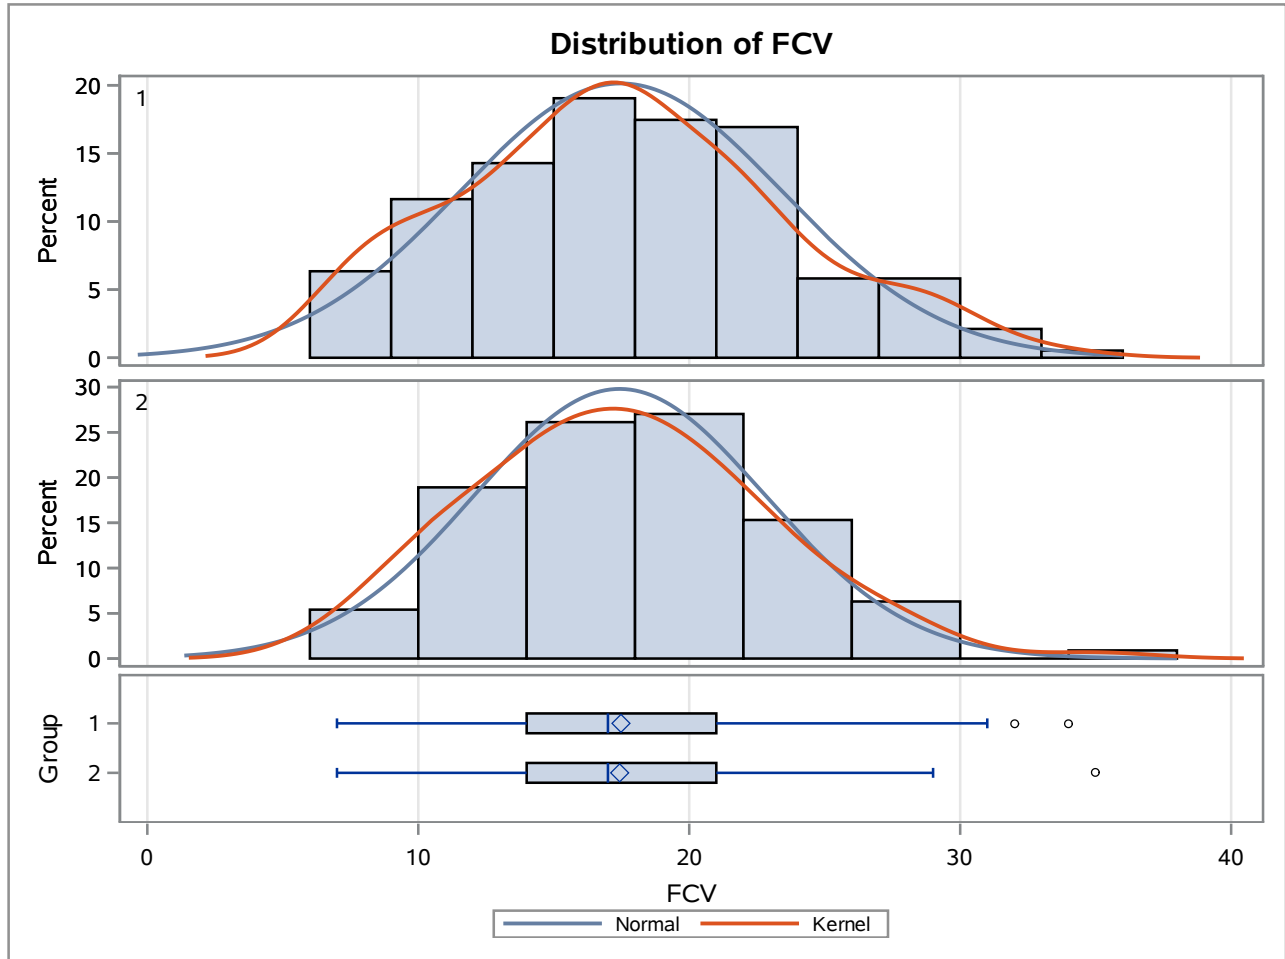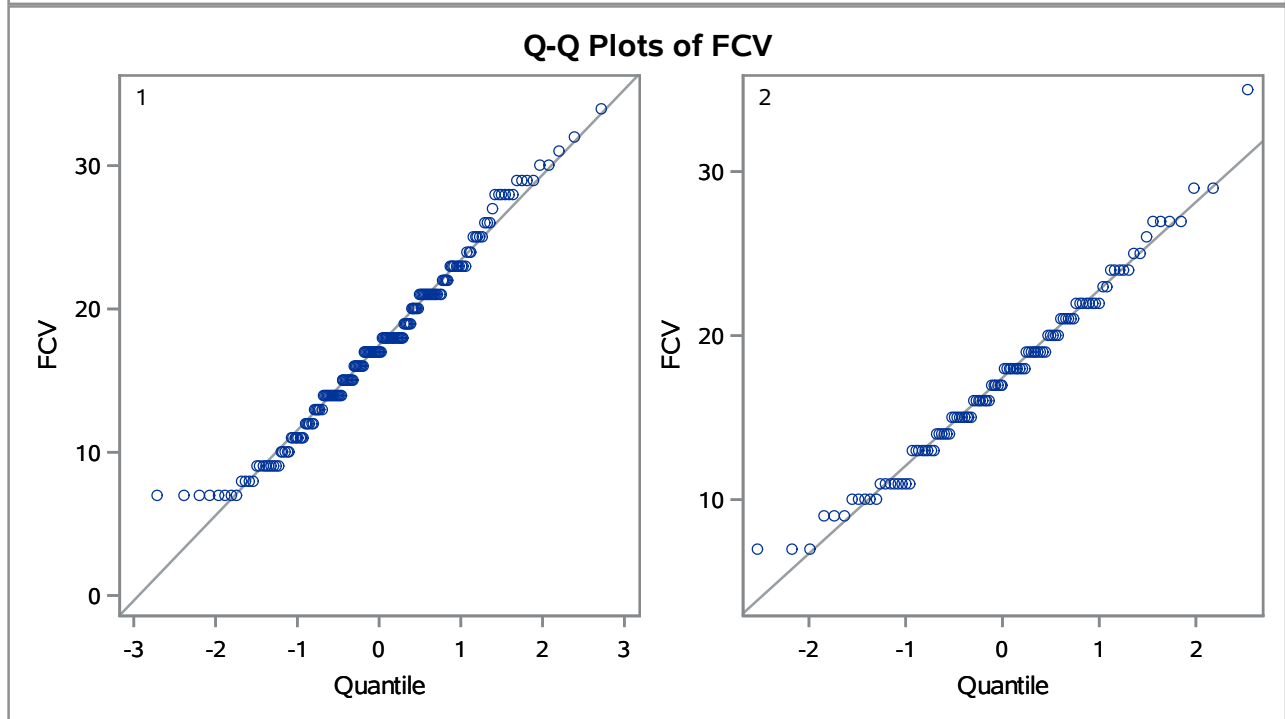

Variable: WHOQOL  
Group = 2

Variable: WHOQOL

Variable: WHOQOL

| Group      | N   | Mean    | Std Dev | Std Err | Minimum | Maximum |
|------------|-----|---------|---------|---------|---------|---------|
| 1          | 189 | 84.0000 | 13.9970 | 1.0181  | 49.0000 | 118.0   |
| 2          | 111 | 89.0721 | 15.2528 | 1.4477  | 54.0000 | 123.0   |
| Diff (1-2) |     | -5.0721 | 14.4732 | 1.7307  |         |         |

| Group      | Method        | Mean    | 95% CL Mean |         | Std Dev | 95% CL Std Dev |         |
|------------|---------------|---------|-------------|---------|---------|----------------|---------|
| 1          |               | 84.0000 | 81.9916     | 86.0084 | 13.9970 | 12.7138        | 15.5704 |
| 2          |               | 89.0721 | 86.2030     | 91.9411 | 15.2528 | 13.4762        | 17.5734 |
| Diff (1-2) | Pooled        | -5.0721 | -8.4781     | -1.6660 | 14.4732 | 13.3987        | 15.7366 |
| Diff (1-2) | Satterthwaite | -5.0721 | -8.5606     | -1.5835 |         |                |         |

| Method        | Variances | DF     | t Value | Pr >  t |
|---------------|-----------|--------|---------|---------|
| Pooled        | Equal     | 298    | -2.93   | 0.0036  |
| Satterthwaite | Unequal   | 214.95 | -2.87   | 0.0046  |

| Equality of Variances |        |        |         |        |
|-----------------------|--------|--------|---------|--------|
| Method                | Num DF | Den DF | F Value | Pr > F |
| Folded F              | 110    | 188    | 1.19    | 0.3019 |

Variable: WHOQOL  
Group = 2

Variable: WHOQOL

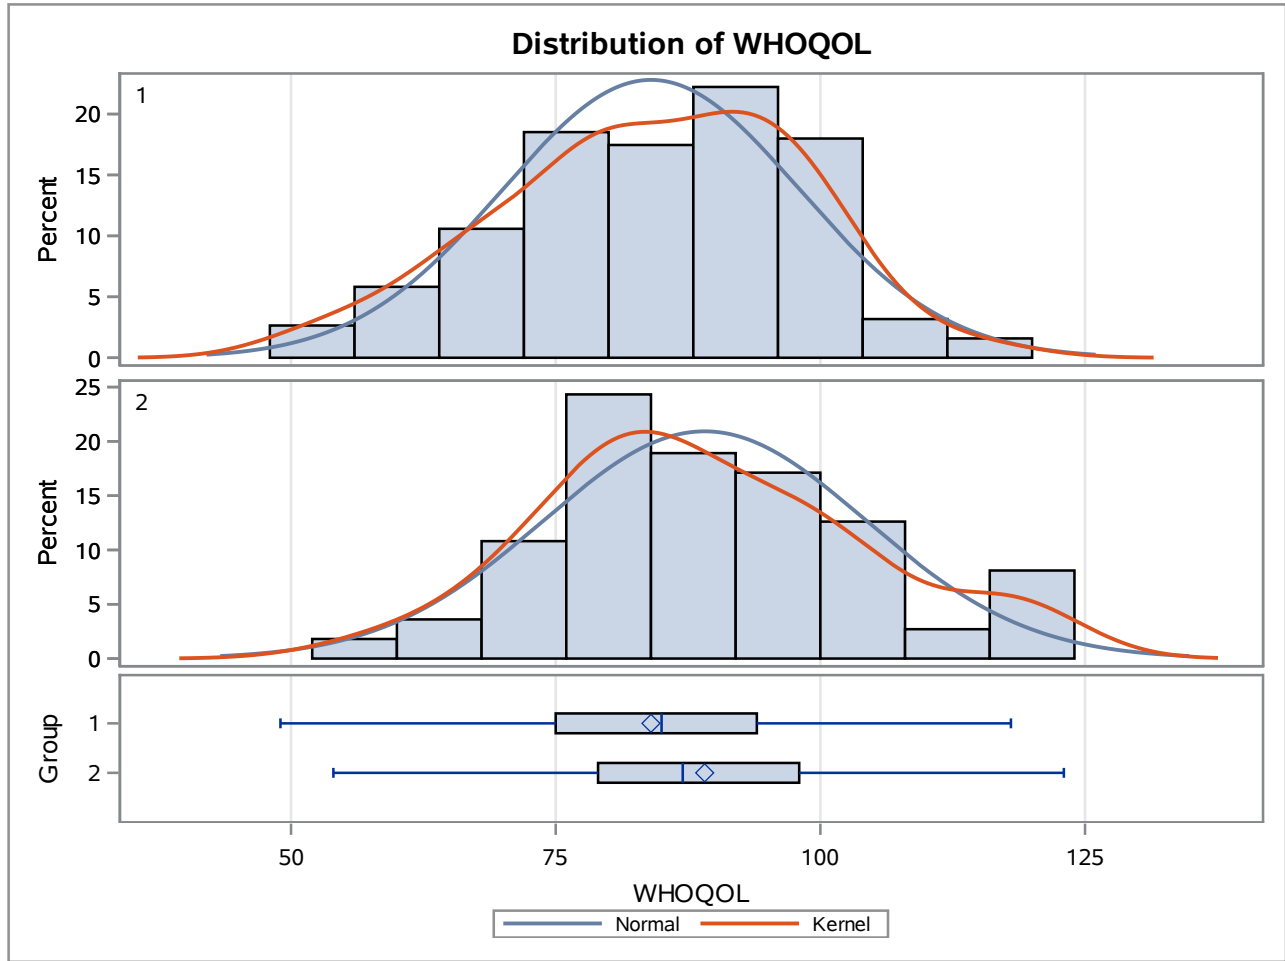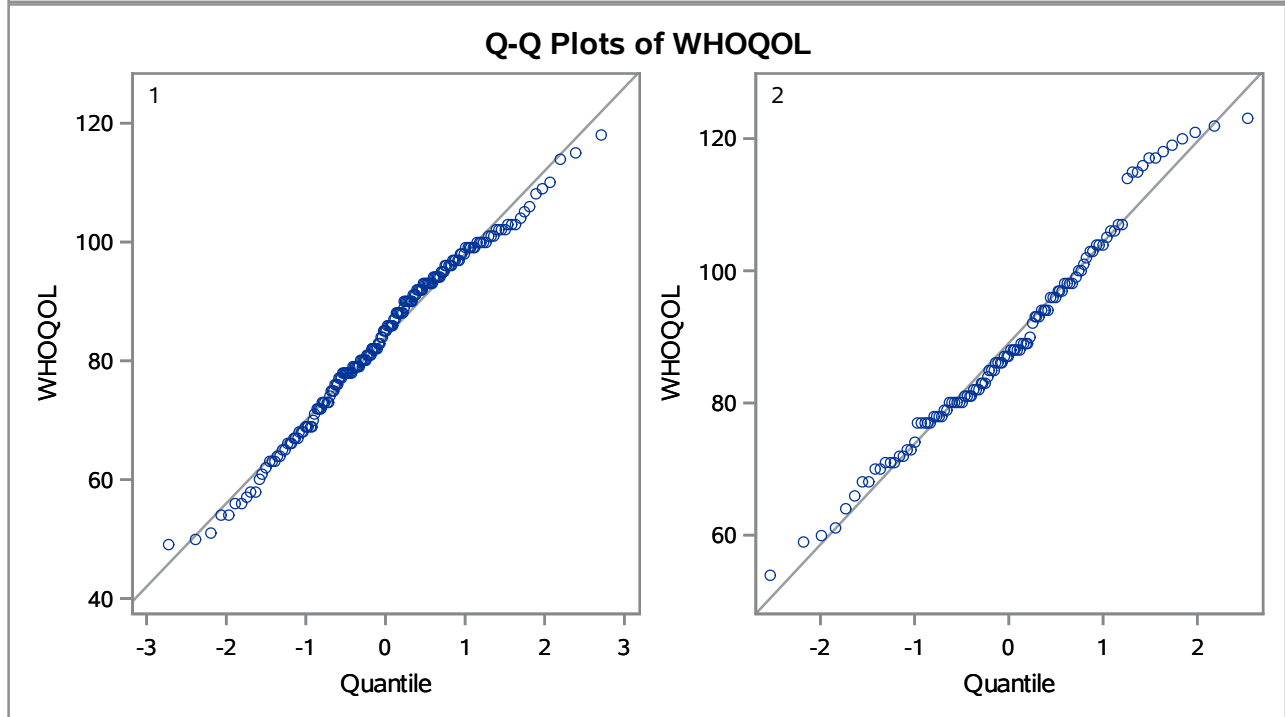



Variable: PRMQ  
Group = 2

Variable: PRMQ

Variable: PRMQ

| Group      | N   | Mean    | Std Dev | Std Err | Minimum | Maximum |
|------------|-----|---------|---------|---------|---------|---------|
| 1          | 189 | 30.1693 | 8.6801  | 0.6314  | 16.0000 | 58.0000 |
| 2          | 111 | 32.6036 | 9.4852  | 0.9003  | 17.0000 | 60.0000 |
| Diff (1-2) |     | -2.4343 | 8.9857  | 1.0745  |         |         |

| Group      | Method        | Mean    | 95% CL Mean |         | Std Dev | 95% CL Std Dev |         |
|------------|---------------|---------|-------------|---------|---------|----------------|---------|
| 1          |               | 30.1693 | 28.9238     | 31.4148 | 8.6801  | 7.8843         | 9.6558  |
| 2          |               | 32.6036 | 30.8194     | 34.3878 | 9.4852  | 8.3803         | 10.9283 |
| Diff (1-2) | Pooled        | -2.4343 | -4.5489     | -0.3197 | 8.9857  | 8.3185         | 9.7700  |
| Diff (1-2) | Satterthwaite | -2.4343 | -4.6017     | -0.2668 |         |                |         |

| Method        | Variances | DF     | t Value | Pr >  t |
|---------------|-----------|--------|---------|---------|
| Pooled        | Equal     | 298    | -2.27   | 0.0242  |
| Satterthwaite | Unequal   | 214.46 | -2.21   | 0.0279  |

| Equality of Variances |        |        |         |        |
|-----------------------|--------|--------|---------|--------|
| Method                | Num DF | Den DF | F Value | Pr > F |
| Folded F              | 110    | 188    | 1.19    | 0.2867 |

Variable: PRMQ  
Group = 2

Variable: PRMQ

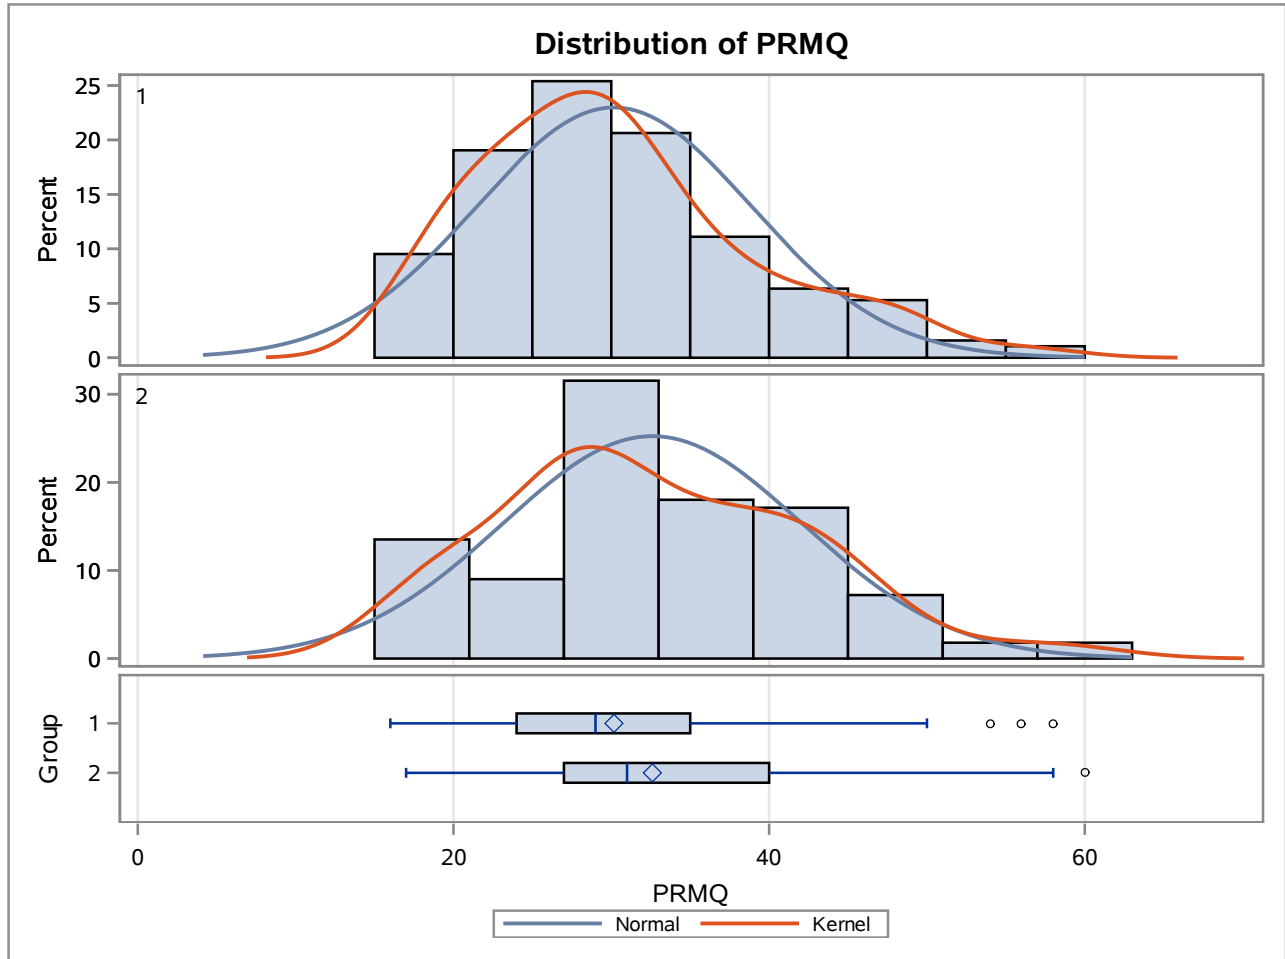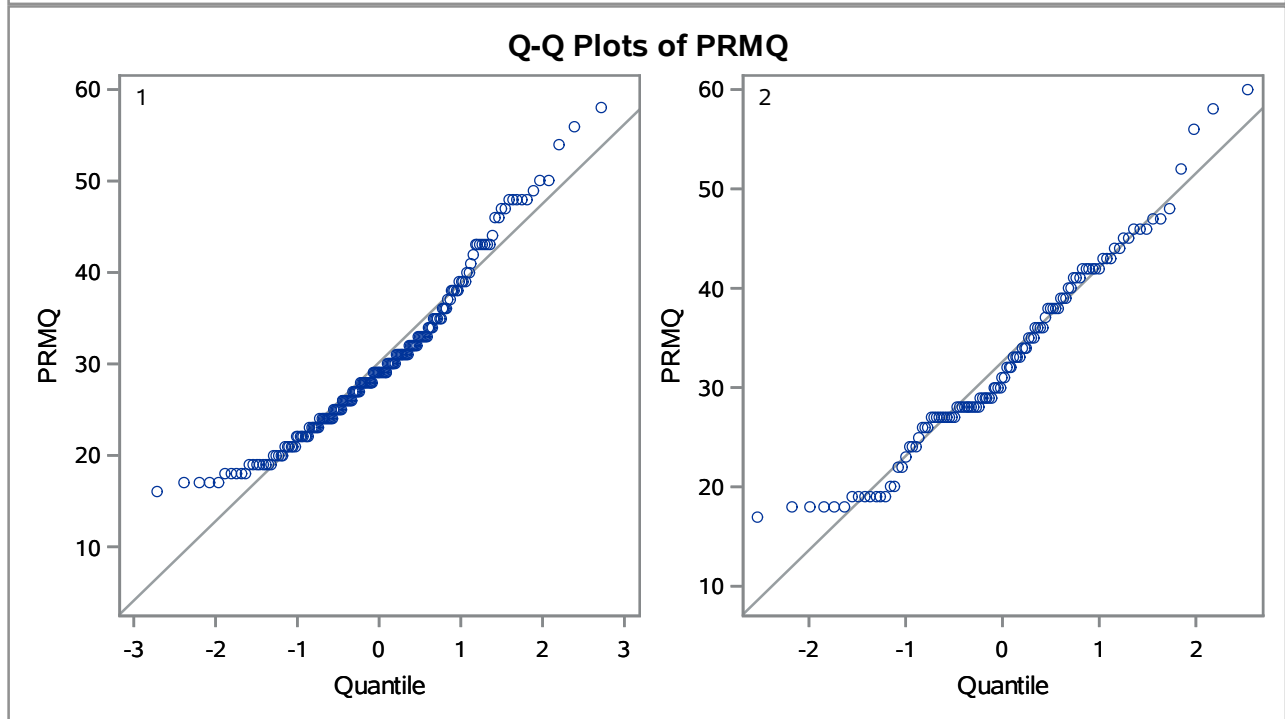

Variable: PM  
Group = 2

Variable: PM

Variable: PM

| Group      | N   | Mean    | Std Dev | Std Err | Minimum | Maximum |
|------------|-----|---------|---------|---------|---------|---------|
| 1          | 189 | 15.4709 | 4.3486  | 0.3163  | 8.0000  | 28.0000 |
| 2          | 111 | 18.4775 | 5.6470  | 0.5360  | 9.0000  | 31.0000 |
| Diff (1-2) |     | -3.0066 | 4.8683  | 0.5822  |         |         |

| Group      | Method        | Mean    | 95% CL Mean |         | Std Dev | 95% CL Std Dev |        |
|------------|---------------|---------|-------------|---------|---------|----------------|--------|
|            |               |         |             |         |         |                |        |
| 1          |               | 15.4709 | 14.8469     | 16.0949 | 4.3486  | 3.9499         | 4.8374 |
| 2          |               | 18.4775 | 17.4153     | 19.5397 | 5.6470  | 4.9892         | 6.5061 |
| Diff (1-2) | Pooled        | -3.0066 | -4.1523     | -1.8609 | 4.8683  | 4.5069         | 5.2933 |
| Diff (1-2) | Satterthwaite | -3.0066 | -4.2343     | -1.7788 |         |                |        |

| Method        | Variances | DF     | t Value | Pr >  t |
|---------------|-----------|--------|---------|---------|
| Pooled        | Equal     | 298    | -5.16   | <.0001  |
| Satterthwaite | Unequal   | 186.71 | -4.83   | <.0001  |

| Equality of Variances |        |        |         |        |
|-----------------------|--------|--------|---------|--------|
| Method                | Num DF | Den DF | F Value | Pr > F |
| Folded F              | 110    | 188    | 1.69    | 0.0017 |

Variable: PM  
Group = 2

Variable: PM

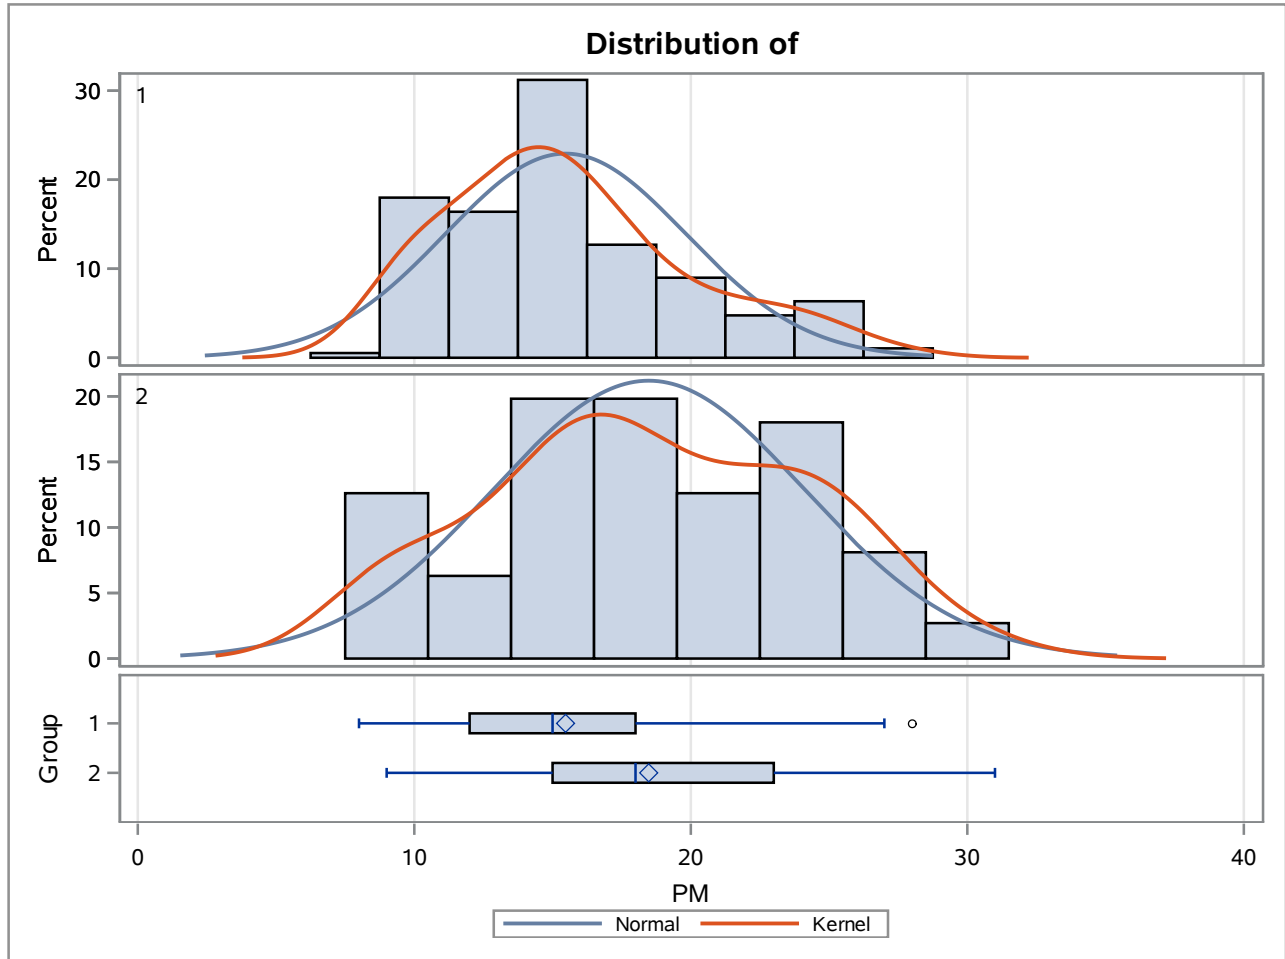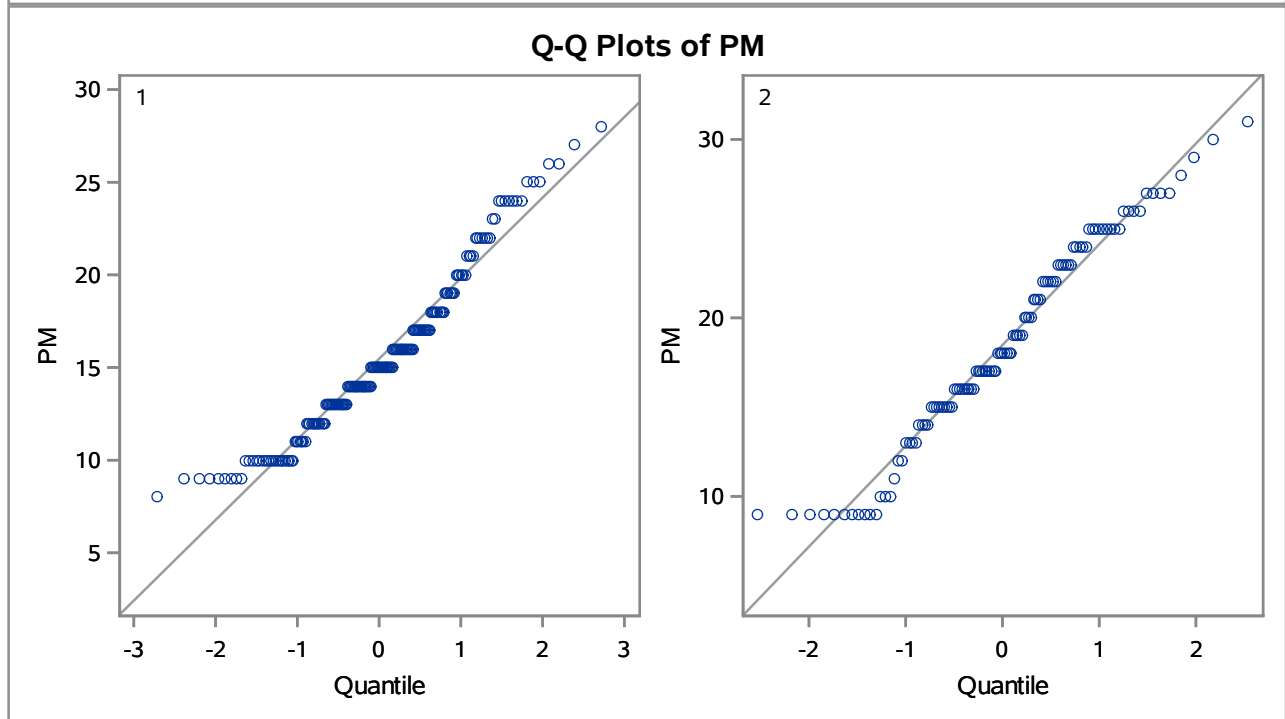

Variable: RM  
Group = 2

Variable: RM

Variable: RM

| Group      | N   | Mean    | Std Dev | Std Err | Minimum | Maximum |
|------------|-----|---------|---------|---------|---------|---------|
| 1          | 189 | 14.6984 | 4.6102  | 0.3353  | 8.0000  | 30.0000 |
| 2          | 111 | 14.1261 | 4.4927  | 0.4264  | 8.0000  | 32.0000 |
| Diff (1-2) |     | 0.5723  | 4.5672  | 0.5462  |         |         |

| Group      | Method        | Mean    | 95% CL Mean |         | Std Dev | 95% CL Std Dev |        |
|------------|---------------|---------|-------------|---------|---------|----------------|--------|
|            |               |         | Lower       | Upper   |         | Lower          | Upper  |
| 1          |               | 14.6984 | 14.0369     | 15.3599 | 4.6102  | 4.1876         | 5.1285 |
| 2          |               | 14.1261 | 13.2811     | 14.9712 | 4.4927  | 3.9693         | 5.1762 |
| Diff (1-2) | Pooled        | 0.5723  | -0.5025     | 1.6471  | 4.5672  | 4.2281         | 4.9659 |
| Diff (1-2) | Satterthwaite | 0.5723  | -0.4965     | 1.6410  |         |                |        |

| Method        | Variances | DF     | t Value | Pr >  t |
|---------------|-----------|--------|---------|---------|
| Pooled        | Equal     | 298    | 1.05    | 0.2956  |
| Satterthwaite | Unequal   | 235.44 | 1.05    | 0.2925  |

| Equality of Variances |        |        |         |        |
|-----------------------|--------|--------|---------|--------|
| Method                | Num DF | Den DF | F Value | Pr > F |
| Folded F              | 188    | 110    | 1.05    | 0.7731 |

Variable: RM  
Group = 2

Variable: RM

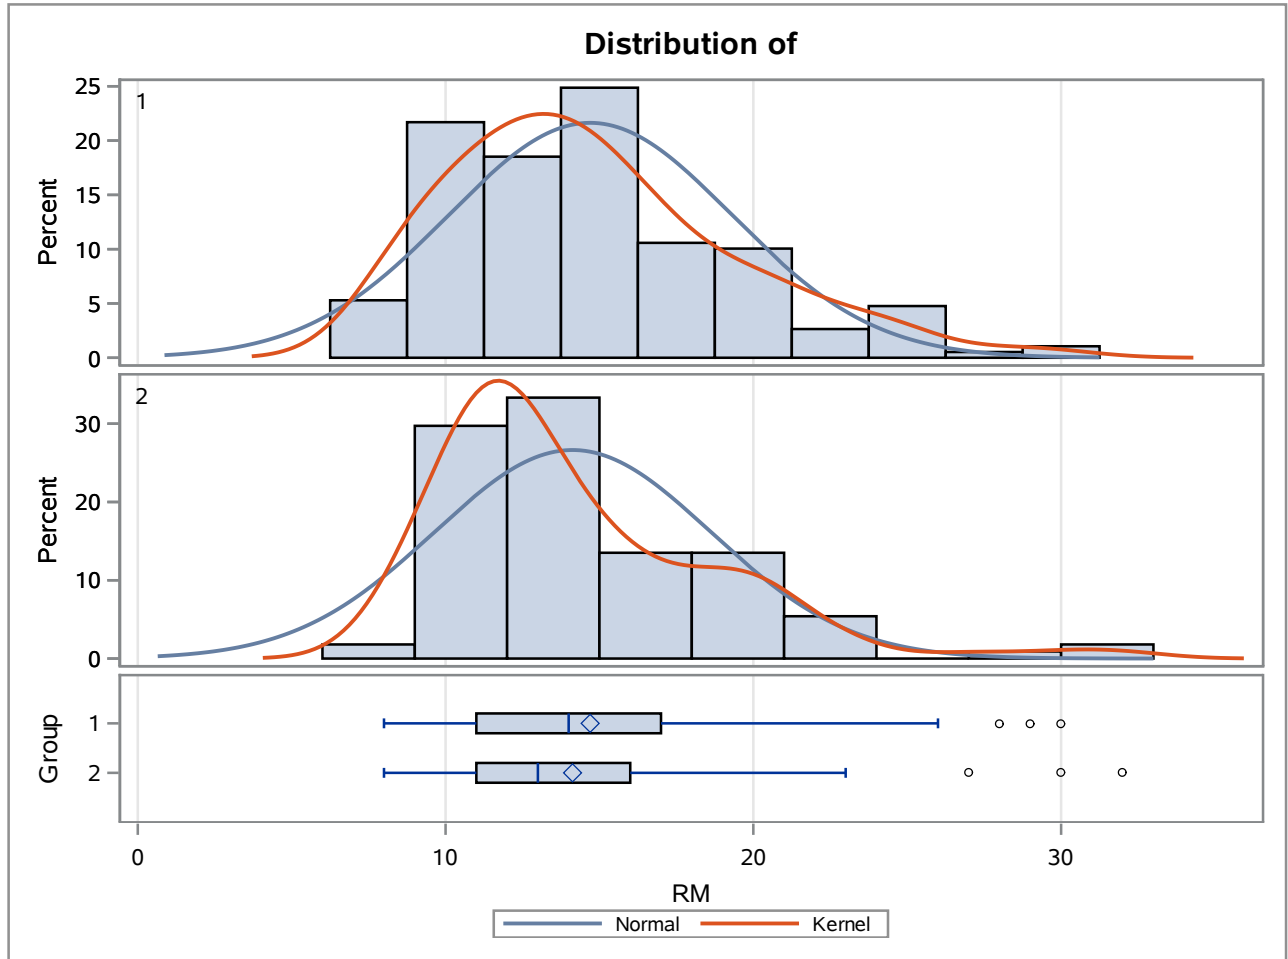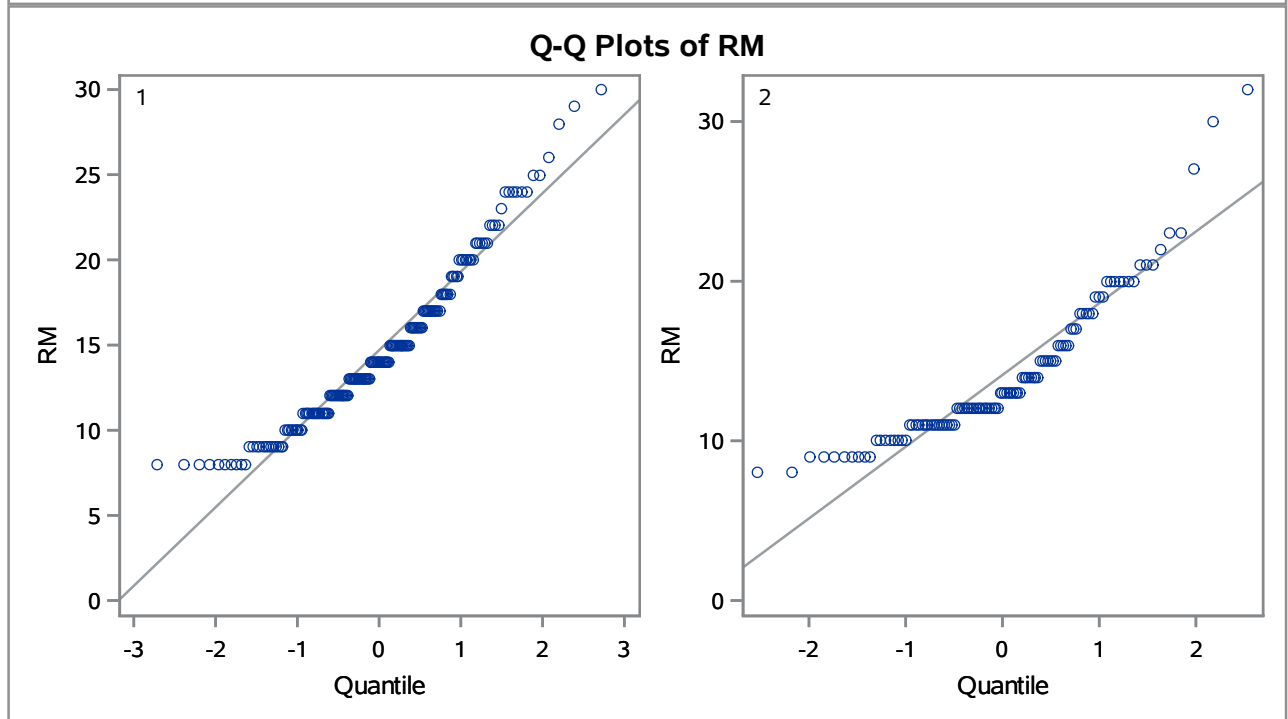

Variable: SMCQ  
Group = 2

Variable: SMCQ

Variable: SMCQ

| Group      | N   | Mean    | Std Dev | Std Err | Minimum | Maximum |
|------------|-----|---------|---------|---------|---------|---------|
| 1          | 189 | 2.6402  | 2.5511  | 0.1856  | 0       | 14.0000 |
| 2          | 111 | 2.9640  | 2.6489  | 0.2514  | 0       | 10.0000 |
| Diff (1-2) |     | -0.3238 | 2.5877  | 0.3094  |         |         |

| Group      | Method        | Mean    | 95% CL Mean |        | Std Dev | 95% CL Std Dev |        |
|------------|---------------|---------|-------------|--------|---------|----------------|--------|
|            |               |         | Lower       | Upper  |         | Lower          | Upper  |
| 1          |               | 2.6402  | 2.2742      | 3.0063 | 2.5511  | 2.3172         | 2.8379 |
| 2          |               | 2.9640  | 2.4657      | 3.4622 | 2.6489  | 2.3404         | 3.0519 |
| Diff (1-2) | Pooled        | -0.3238 | -0.9327     | 0.2852 | 2.5877  | 2.3955         | 2.8135 |
| Diff (1-2) | Satterthwaite | -0.3238 | -0.9396     | 0.2920 |         |                |        |

| Method        | Variances | DF     | t Value | Pr >  t |
|---------------|-----------|--------|---------|---------|
| Pooled        | Equal     | 298    | -1.05   | 0.2963  |
| Satterthwaite | Unequal   | 223.65 | -1.04   | 0.3013  |

| Equality of Variances |        |        |         |        |
|-----------------------|--------|--------|---------|--------|
| Method                | Num DF | Den DF | F Value | Pr > F |
| Folded F              | 110    | 188    | 1.08    | 0.6464 |

Variable: SMCQ  
Group = 2

Variable: SMCQ

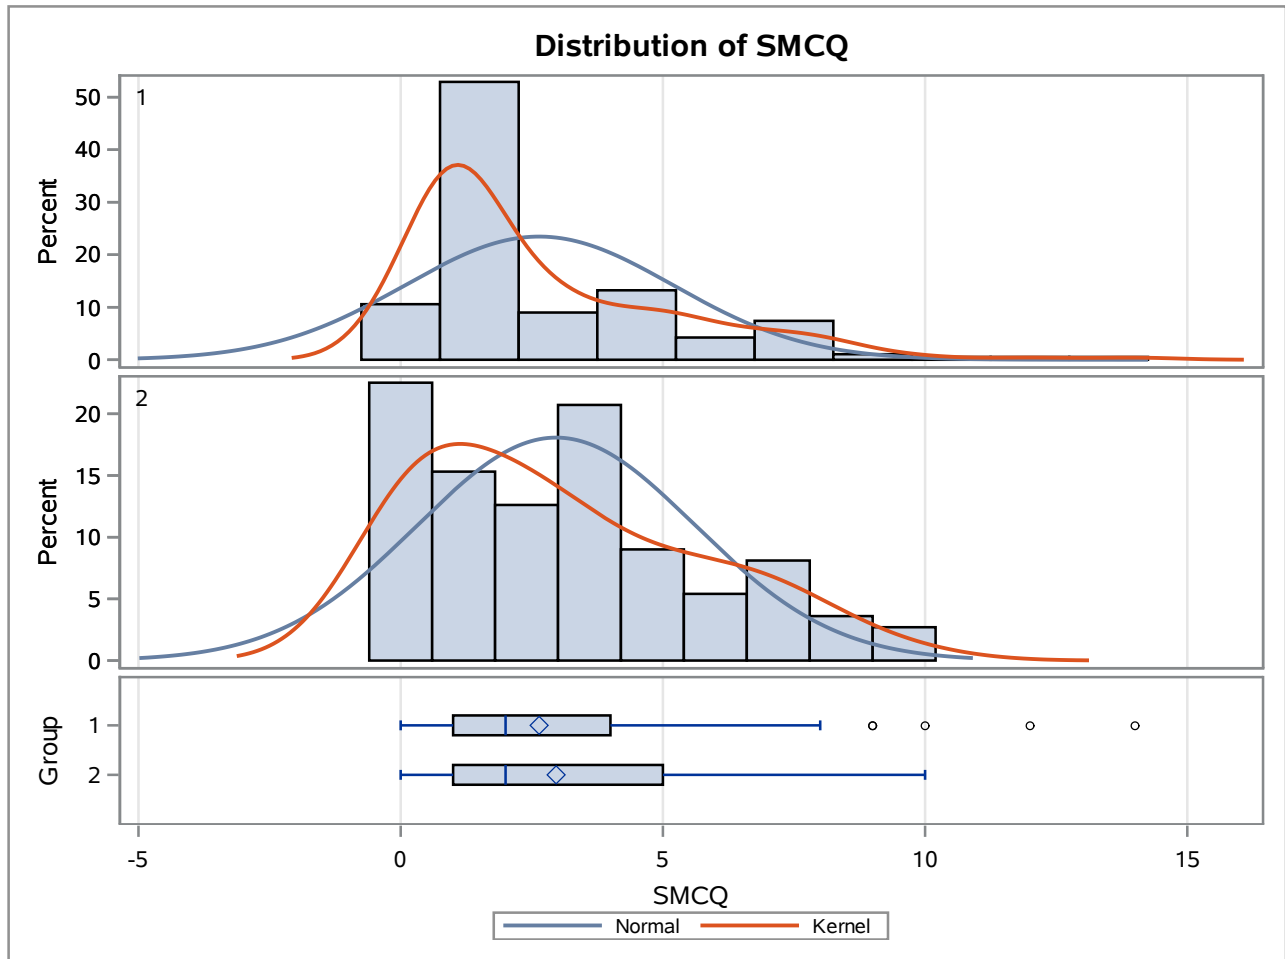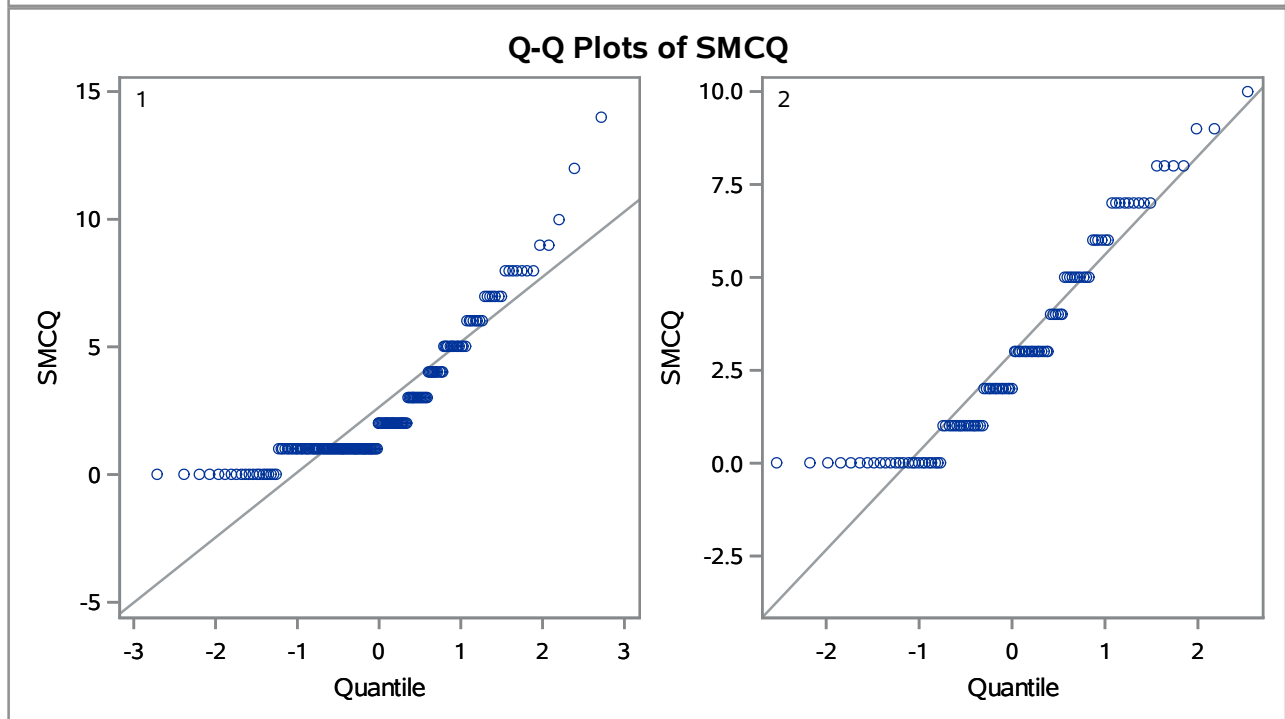

Supplement: MOESM2 [file 26934458]
